# Supplementary material for: The role of Rif1 in telomere length regulation is separable from its role in origin firing
Source: eLife journal article supplement (doi:10.7554/elife.58066), 2020-06-29

**A**

|          | RVxF motif<br>"Site 1"                        | SILK motif<br>"Site 2" | "Site 3"       | "Site 4"       |
|----------|-----------------------------------------------|------------------------|----------------|----------------|
| WT       | PVTIKSVAFSDRIESSPIYRIPGSSPKPSPSSKPGK          | SILRNFLP               | / GILR         | / KIVKW        |
| pp1bs    | PVT <b>ASAA</b> SDRIESSPIYRIPGSSPKPSPSSKPGK   | <b>SAAN</b> FLP        | / GILR         | / KIVKW        |
| R/S      | PVTKS <b>ARAS</b> DRIESSPIYRIPGSSPKPSPSSKPGK  | <b>RRAN</b> FLP        | / GILR         | / KIVKW        |
| pp1bs-4P | PVT <b>ASAA</b> SDRIESSPIYRIPGSSPKPSPSSKPGK   | <b>SAAN</b> FLP        | / <b>GAA</b> R | / <b>KIAKA</b> |
| pp1bsD   | PVT <b>ASAA</b> FS DRIESSPIYRIPGSSPKPSPSSKPGK | <b>SAAN</b> FLP        | / <b>GAA</b> R | / <b>KIAKA</b> |

**B**

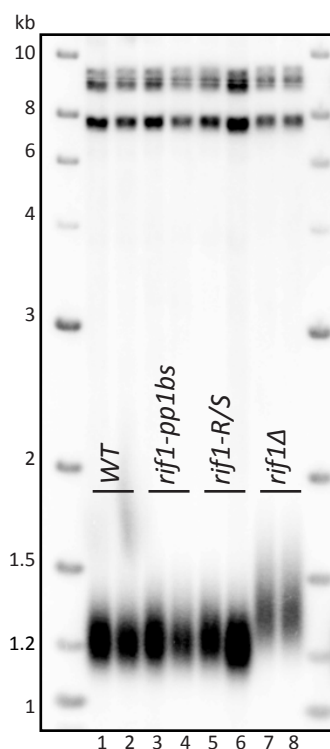

**C**

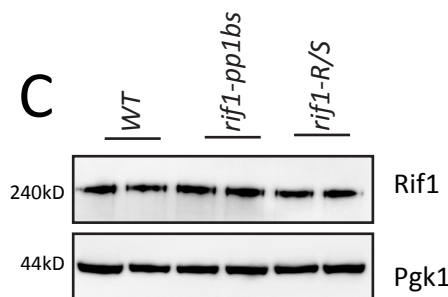

**D**

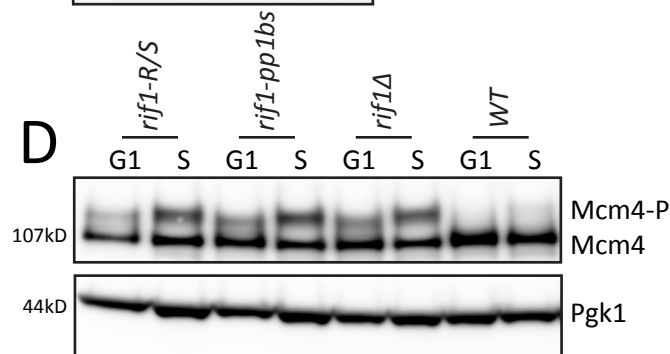

**E**

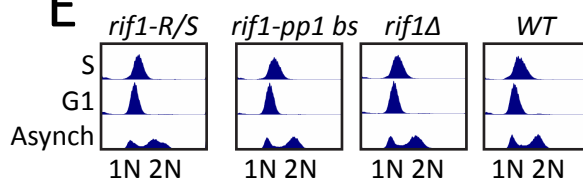

**F**

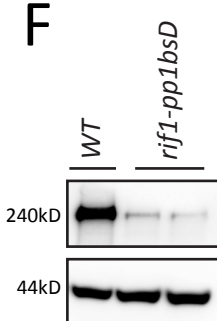

**G**

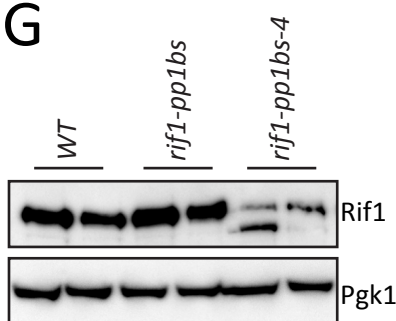

Supplement: supp [file elife_poa_e58066_Figure_1_figure_supplement_2.pdf › elife_poa_e58066_Figure_1_figure_supplement_2.pdf]
