# Supplementary material for: The role of Rif1 in telomere length regulation is separable from its role in origin firing
Source: eLife. 2020 Jun 29;9:e58066. doi: 10.7554/eLife.58066 (PMC7371424; doi:10.7554/eLife.58066)
Supplement: Supplementary file 1. [file elife-58066-supp1.xlsx]

## Sheet: Strains
Strain ID	Genotype	Source	Figure
SSy161	MATa ade2-1 ura3-1 his3-11,15 trp1-1 leu2-3,112 can1-100 bar1::hisG		N/A
CVy61	SSy161 + TRP1::BrdU–Inc	https://doi.org/10.1002/yea.1406	N/A
CALy120, 121	CVy61 + rif1-pp1bs4-(K114A V116A F118A I147A L148A R149A I223A L224A V318A W320A)-13myc::KANMX	This study	1
CALy140, 141	CVy61 + MCM4-G6 linker-2XFLAG	This study	2
CALy149, 150	CALy140 + ADH promoter- DBF4-G6 linker-V5 (at URA3 locus)	This study	2
CALy151, 152	CALy140 + ADH promoter- ∆N (∆2-65)-dbf4-G6 linker-V5 (at URA3 locus)	This study	2
CALy153, 154	CALy140 + ADH promoter- CDC7-6xHIS-HA (at LEU2 locus)	This study	2
CALy155 (DDK)	CALy149 + ADH promoter- CDC7-6xHIS-HA (at LEU2 locus)	This study	2
CALy406 (DDK)	CALy153 + ADH promoter- DBF4-G6 linker-V5 (at URA3 locus)	This study	2
CALy156 (∆N-dbf4 CDC7)	CALy151 + ADH promoter- CDC7-6xHIS-HA (at LEU2 locus)	This study	2
CALy407 (∆N-dbf4 CDC7)	CALy153 + ADH promoter- ∆N (∆2-65) -dbf4-G6 linker-V5 (at URA3 locus)	This study	2
CALy157, 158	CALy140 + rif1∆::KANMX	This study	1,2,3,4
CALy191, 192	CALy140 + RIF1-13myc::KANMX	This study	1,3,4
CALy193, 194	CALy140 + rif1-pp1bs-2 (K114A V116A F118A I147A L148A R149A)-13myc::KANMX	This study	1
CALy145	MATa (haploid segregant from CALy134)	This study	3
CALy216	MATa sld3-A-13myc::hygR mcm5-bob1 (P83L) ::HIS3 (haploid segregant from CALy164)	This study	3
CALy321	CALy191 + sld3-A-13myc::HYGR	This study	3
CALy323	CALy321 + mcm5-bob1 (P83L)::HIS3	This study	3
CALy338, 339	CALy140 + rif1-∆1322-13myc::KANMX	This study	4
CALy358, 359	CALy140 + rif1-HOOK (K437E K563E K570E)-13myc::KANMX	This study	4
CALy344, 405	CALy140 + rif1-R/S (V116R F118R I147R L148R R149A)-13myc ::KANMX	This study	Supplemental Figure 2 relating to Figure 1
CALy134, 135	diploid: mcm5-bob1 (P83L)::HIS/MCM5 ; SLD3/sld3-A-13myc::KANMX	This study (mated y2043 and y2357)	3 (haploids Southern)
CALy164, 165	diploid: CALy135+ RIF1/rif1-pp1bs-2 (K114A V116A F118A I147A L148A R149A)-13myc::KANMX	This study	3 (haploids passaged Southern)
y2043	W303alpha mcm5-bob1 (P83L)::HIS	gift from John Diffley; doi: 10.1038/nature09373	N/A
y2357	W303a sld3-A-13myc::KANMX	gift from John Diffley; doi: 10.1038/nature09373	N/A
ASy26	SHy201 Rif1-13myc::HIS3	gift from Anne Donaldson; doi: 10.1101/gad.231258.113	Supplemental Figure 2 relating to Figure 1
SMKy30, 31	ASy26 rif1-pp1bsD-(K114A V116A I147A L148A I223A L224A V318A W320A)-13myc::HIS3	gift from Anne Donaldson; doi: 10.1093/nar/gky132	Supplemental Figure 2 relating to Figure 1

## Sheet: Constructs for cloning
Construct for cloning	Resulting Strain (CALy)	Template	Oligo 1	Oligo 2	Oligo 3	Oligo 4	Oligo 5
MCM4-2XFLAG- using crispr	140, 141	N/A	CS264	CS265	CS268	CS269	CS263*
rif1∆	157, 158	rif1∆::kanmx gDNA	OCC23	OCC84		Note* CS263 includes Mcm4 gRNA, and was inserted using Gibson assembly into BplI digested pJH2972 before transformation into yeast
sld3-A-13myc	321	pCS174	CS326	CS374
mcm5-bob1	323	mcm5-bob1::HIS3 gDNA	CS270	CS373
rif1-∆1322-13myc	338, 339	pCS141	RW428	CS323
rif1HOOK-13myc	358, 359	pCS181	RW428	CS323
Construct for cloning	Resulting Strain (CALy)	Template	Enzyme 1	Enzyme 2
rif1-pp1bs-4-13myc	120, 121	pCS85	NheI	NotI
Dbf4-V5 integrated at URA3	155, 406	pCS126	NcoI-HF
∆N-dbf4-V5 integrated at URA3	151, 152, 156, 407	pCS127	NcoI-HF
Cdc7-HA integrated at LEU2	155, 156, 406, 407	pCS130	AflII
RIF1-13myc	191, 192	pCS49	XhoI	NotI
rif1-pp1bs-13myc	193, 194	pCS49	XhoI	NotI
rif1-R/S-13myc	344, 405	pCS175	XhoI	NotI
Cells and enzymes for cloning
NEB5a	New England Biolabs	NEB:C2987H
TOP10	Thermo Fisher Scientific	Thermo:C404010
DH5a	Thermo Fisher Scientific	Thermo:18265017
XhoI	New England Biolabs	NEB:R0146L
NotI	New England Biolabs	NEB:R0189S
NheI	New England Biolabs	NEB:R0131S
NcoI-HF	New England Biolabs	NEB:R3193S
AflII	New England Biolabs	NEB:R0520S
BplI	Thermo Fisher Scientific	Thermo:ER1312

## Sheet: Plasmids_primers_media
Primers	Sequence
CS263	GCAGTGAAAGATAAATGATCAGCATCAGACACGGTTATTCGTTTTAGAGCTAGAAATAGC
CS264	AGGTCATTGTCCTTGGCGAGGGTGTAAGGAGATCAGTTCGGCTGAATAACCGTGTcgggggaggcgggggtggagattacaaggacgacg
CS265	gagattacaaggacgacgatgacaaggattacaaggacgacgatgacaagTGATGCTGTCTACTACAATCATTCCCTGCGTAACAATTAA
CS268	GAGGACAAGGTCATTGTCCTTGG
CS269	GCTATAATTAATTAGTATTTATTAATTGTTACGCAGGGAATG
CS270	TTGTTGCTATGCGGTGTGTG
CS323	GTGCGAATTATTGGGTTATGATAACG
CS326	CGGAAGTGACAGTTACAAAATAGC
CS373	CAAACATACGACATGATAAAACGG
CS374	CATTTTGAAAAGAGACGACGC
OCC23	TTTTCAGTTCTTTGTGTTTTTCCTC
OCC84	TGATCCTTTAGAATGGAGAAGATTG
RW428	TGTTAACGAGGTTGATCAGAAATTCAA
Y' PROBE FOR SOUTHERN- PCR from gDNA
YPrimeFWD	CGCGAATTCGCCCTACAGCACTTCTACATAGC	doi.org/10.1534/genetics.115.177899
YPrimeREV	CGAGAATTCCAGCGTTTGCGTTCCATGACG	doi.org/10.1534/genetics.115.177899
PLASMID	DESCRIPTION	REFERENCE
pCR2.1	Thermo Fisher Scientific	Thermo: K202020
pJH2972	pRS316 + Cas9 and BplI cloning site for gRNA	gift from Jim Haber; doi:10.1038/protex.2017.021a; RRID: Addgene_100956
pCS49	rif1-PP1BSmut- 2 site-myc::KANMX (K114A V116A F118A I147A L148A R149A)	this study
pCS85	rif1-PP1BSmut- 4 site-myc::KANMX	this study
pCS126	pRS406-ADH promoter-DBF4-G6 linker-V5	this study
pCS127	pRS406-ADH promoter-∆N-dbf4-G6 linker-V5	this study
pCS130	pRS405-ADH promoter-CDC7-6HIS-HA	this study
pCS141	pCS49 + ∆1322 truncation	this study
pCS174	pCR2.1 + Sld3-A-HygR	this study
pCS175	pCS49 + R/S mutant	this study
pCS181	pCS49 + HOOK mutations (K437E K563E K570E)	this study
YEAST MEDIA SUPPLEMENTS
Alpha Factor	25ng/ml for bar1∆ for 2hrs; 8µg/ml for 1hr supplemented with 6µg/ml for 1hr	US Biological H9120
Hydroxyurea	200mM for 90min	Sigma T6901; US Biological Y2016
