# Supplementary material for: The role of Rif1 in telomere length regulation is separable from its role in origin firing
Source: eLife. 2020 Jun 29;9:e58066. doi: 10.7554/eLife.58066 (PMC7371424; doi:10.7554/eLife.58066)
Supplement: Supplementary file 2. [file elife-58066-supp2.xlsx]

## Sheet: BedGraphs
Source data is available at: https://www.ncbi.nlm.nih.gov/bioproject/PRJNA627739			Figure 3	Figure 3	Figure 1	Figure 1	Figure 1	Figure 2	Figure 2	Figure 2, 4	Figure 4	Figure 4
			CALy145	CALy216	CALy157	CALy193	CALy191	CALy151	CALy156	CALy191	CALy338	CALy358
track type=bedGraph	Start	End	WT-1	sld3-A bob1	rif1∆	rif1-pp1bs	WT-2	∆N-dbf4 o/e	∆N-dbf4 Cdc7 o/e	WT-3	rif1-∆1322	rif1HOOK
chrI	1	250	1.05	1.15	0.99	1.02	1	0.9	0.94	0.99	0.93	1.01
chrI	251	500	1	1.19	0.93	0.97	1	0.94	0.93	0.95	0.92	0.95
chrI	501	750	0.99	1.19	0.94	1.07	1.01	0.97	0.94	0.98	0.91	0.95
chrI	751	1000	0.98	1.19	1.02	1.08	1.02	0.96	0.94	0.93	0.92	0.92
chrI	1001	1250	0.96	1.12	1.02	1.02	1.02	0.96	0.97	0.94	0.95	0.92
chrI	1251	1500	0.97	1.1	0.95	1.02	1.05	0.94	0.92	0.95	0.99	0.94
chrI	1501	1750	0.95	1.05	0.96	1.16	1.05	0.98	0.97	0.98	0.98	0.94
chrI	1751	2000	1	1.02	1.02	0.99	1.02	0.95	0.91	1	0.97	0.97
chrI	2001	2250	1.05	1.02	0.99	1.01	1.02	0.95	0.94	0.99	1.01	0.94
chrI	2251	2500	1.03	0.98	0.99	0.98	0.99	0.96	0.96	0.93	0.97	0.95
chrI	2501	2750	0.99	0.98	1.05	1.03	1.01	0.94	0.94	0.95	0.98	0.97
chrI	2751	3000	0.98	1.02	0.97	1.08	1	0.96	0.98	0.93	0.97	0.94
chrI	3001	3250	0.97	1.03	0.96	1.12	1.01	0.98	1	0.95	0.92	0.95
chrI	3251	3500	1	0.98	0.92	1.04	0.99	0.96	1	0.94	0.93	0.95
chrI	3501	3750	1	1.01	0.99	1.03	0.99	0.95	1.03	0.92	0.95	0.95
chrI	3751	4000	1.01	0.99	0.97	1.02	0.98	0.93	0.99	0.97	0.91	0.95
chrI	4001	4250	1	1.01	0.92	1.04	0.98	0.99	0.97	0.96	0.9	0.9
chrI	4251	4500	1	1.04	0.95	1.02	0.99	1.02	1.03	0.97	0.91	0.9
chrI	4501	4750	1.03	1.05	1.01	1.03	1.04	1.02	1.03	0.97	0.89	0.87
chrI	4751	5000	0.99	0.96	1	1.01	1.03	1.01	1	0.95	0.88	0.88
chrI	5001	5250	0.99	0.94	0.98	1.08	1	1.01	0.98	0.94	0.96	0.89
chrI	5251	5500	1.01	0.97	1.02	1.03	1.01	1.03	0.96	0.95	0.94	0.91
chrI	5501	5750	1.02	0.99	1.04	1.06	1.03	0.95	0.97	0.95	0.93	0.88
chrI	5751	6000	1	0.99	1.04	1.12	1.05	0.94	0.97	0.94	0.91	0.92
chrI	6001	6250	0.96	1.03	1	1.05	1.03	0.9	1.01	0.92	0.92	0.97
chrI	6251	6500	0.96	1.03	0.97	1.01	1.01	0.95	1.02	0.97	0.95	0.93
chrI	6501	6750	0.96	1.06	0.92	1.09	1.01	0.99	1.04	0.92	0.91	0.91
chrI	6751	7000	0.95	1.14	0.88	1.07	0.99	1.03	1.04	0.92	0.89	0.88
chrI	7001	7250	0.94	1.13	0.99	1.03	0.98	1.07	1.02	0.91	0.85	0.9
chrI	7251	7500	0.96	1.07	1.05	0.97	0.98	0.95	0.96	0.93	0.91	0.95
chrI	7501	7750	0.97	1.03	1.03	1.01	1	0.93	0.98	0.97	0.93	0.95
chrI	7751	8000	1	1.06	0.97	1.07	1	0.94	0.97	0.94	0.94	0.92
chrI	8001	8250	0.97	1.05	0.98	0.99	1	0.96	0.95	0.97	0.95	0.95
chrI	8251	8500	0.96	1.06	1.01	1.01	1.03	0.95	0.99	0.93	0.92	0.93
chrI	8501	8750	1.01	1.04	1.02	1.03	0.98	0.98	1.04	0.93	0.92	0.92
chrI	8751	9000	1.03	1.04	0.96	0.99	0.99	0.96	1.04	0.91	0.93	0.95
chrI	9001	9250	0.97	0.98	0.92	1.04	1.03	1	1.05	0.94	0.96	0.93
chrI	9251	9500	0.99	1	0.95	1	0.99	0.96	1.03	0.97	0.94	0.95
chrI	9501	9750	1.02	1.02	0.94	1.07	0.99	0.97	1.04	0.95	0.93	0.9
chrI	9751	10000	0.99	1.08	0.98	1.18	0.98	0.97	1.03	0.94	0.93	0.89
chrI	10001	10250	0.92	1.08	0.94	1.12	1	1.04	1.01	0.92	0.9	0.87
chrI	10251	10500	0.93	1.03	0.94	1.08	1.02	1.04	1.03	0.93	0.88	0.89
chrI	10501	10750	0.95	1.01	1.04	1.11	1.04	0.99	1.03	0.96	0.85	0.92
chrI	10751	11000	0.91	1.03	1.01	1.13	1.06	0.96	1.03	0.98	0.85	0.91
chrI	11001	11250	0.9	1.17	0.99	1.11	1.03	0.96	1.03	0.91	0.88	0.9
chrI	11251	11500	0.93	1.16	0.99	1.09	1.06	0.99	1	0.87	0.93	0.93
chrI	11501	11750	1	1.04	1.03	1.01	1.02	0.9	0.96	0.93	0.92	0.92
chrI	11751	12000	1	1.03	0.98	0.91	0.98	0.92	0.87	0.94	0.91	0.99
chrI	12001	12250	1.01	1.01	1	0.93	0.98	0.91	0.87	0.95	0.93	0.99
chrI	12251	12500	1.05	1.01	0.95	0.94	1	0.88	0.9	0.95	0.94	0.99
chrI	12501	12750	1.01	1	1.01	1	1	0.92	0.92	0.95	0.95	0.94
chrI	12751	13000	1	1.04	1.05	1.02	1	0.92	0.9	0.94	0.98	0.95
chrI	13001	13250	1.03	1.01	1.05	0.95	0.95	0.94	0.89	0.93	0.95	0.96
chrI	13251	13500	1.03	1.02	1.04	0.93	0.93	0.91	0.88	0.96	0.91	0.96
chrI	13501	13750	1.01	1.03	1	0.92	0.94	0.92	0.91	0.93	0.92	0.97
chrI	13751	14000	1.01	0.97	1.01	1.01	0.98	0.94	0.93	0.93	0.94	0.96
chrI	14001	14250	1.03	1.03	1	1.05	1	0.95	0.94	0.97	0.96	0.93
chrI	14251	14500	1	1.03	1	0.93	0.96	0.91	0.93	0.94	0.94	0.98
chrI	14501	14750	0.99	1.03	0.95	0.91	0.94	0.95	0.99	0.93	0.93	0.95
chrI	14751	15000	0.98	0.96	0.98	0.98	0.95	0.98	1	0.94	0.9	0.94
chrI	15001	15250	1	0.98	1	1.04	0.95	0.95	1.01	0.95	0.92	0.91
chrI	15251	15500	0.96	1.01	0.98	1.05	0.95	0.94	1	0.94	0.94	0.96
chrI	15501	15750	0.98	1.01	1.03	1.07	0.97	0.94	1.03	0.95	0.95	0.93
chrI	15751	16000	1	1.07	1.05	1.06	0.98	0.98	1.05	0.94	0.94	0.92
chrI	16001	16250	0.97	1.05	1.06	0.97	0.98	1.01	1.04	0.94	0.89	0.92
chrI	16251	16500	0.94	1.06	1.05	1.01	0.98	0.99	1.02	0.93	0.93	0.92
chrI	16501	16750	0.92	1.04	0.98	1.06	0.96	0.99	0.97	0.94	0.94	0.94
chrI	16751	17000	0.98	1.13	0.96	1.09	1.03	1.02	0.99	0.93	0.94	0.89
chrI	17001	17250	0.83	1.19	0.95	1.11	1.03	0.98	1.04	0.9	0.9	0.87
chrI	17251	17500	0.83	1.15	1.03	0.97	0.98	1	1	0.88	0.89	0.89
chrI	17501	17750	0.87	1.12	1.03	1.02	0.97	0.98	1.02	0.89	0.91	0.88
chrI	17751	18000	0.99	1.07	0.99	1.07	1.01	0.95	1.01	0.93	0.97	0.89
chrI	18001	18250	1.03	1.06	0.99	1.01	1	1	1.02	0.93	0.94	0.89
chrI	18251	18500	1.02	1.03	1.01	0.95	0.96	0.97	1	0.92	0.93	0.9
chrI	18501	18750	0.98	1	0.98	1	0.95	0.96	1.01	0.94	0.9	0.89
chrI	18751	19000	0.96	1.03	1.01	1.05	0.96	0.99	1	0.95	0.9	0.92
chrI	19001	19250	0.93	1.05	0.99	1.04	0.99	1.01	1.02	0.93	0.91	0.95
chrI	19251	19500	0.93	1.01	0.98	0.99	0.98	0.98	1	0.93	0.88	0.96
chrI	19501	19750	0.98	0.97	0.99	0.95	0.98	0.95	0.96	0.93	0.93	0.96
chrI	19751	20000	1	0.98	0.95	1.03	1.02	0.95	0.95	0.93	0.97	0.95
chrI	20001	20250	1.03	1	0.93	0.97	1	0.95	0.96	0.93	0.91	0.98
chrI	20251	20500	1.05	0.98	0.96	0.99	0.99	0.97	0.99	0.93	0.93	0.96
chrI	20501	20750	1.04	1	0.97	1.03	0.98	0.98	0.96	0.96	0.93	0.93
chrI	20751	21000	1.01	1.01	0.98	0.97	1	0.92	0.93	0.98	0.94	0.93
chrI	21001	21250	0.99	0.97	1.03	0.97	0.99	0.91	0.95	0.97	0.94	0.95
chrI	21251	21500	0.96	0.97	0.99	1.01	0.98	0.94	0.97	0.99	0.92	0.92
chrI	21501	21750	0.94	0.94	0.96	1.03	0.98	0.94	0.96	0.98	0.93	0.9
chrI	21751	22000	0.95	0.97	0.97	1.07	1.01	1	0.97	0.94	0.93	0.91
chrI	22001	22250	0.96	1	0.98	1	0.98	1.02	0.94	0.91	0.89	0.91
chrI	22251	22500	0.94	1.02	0.91	0.97	0.95	1.03	0.94	0.88	0.9	0.87
chrI	22501	22750	0.98	0.97	0.94	0.98	0.94	1	0.96	0.92	0.88	0.9
chrI	22751	23000	1.02	0.94	1	0.96	0.95	0.94	0.95	0.93	0.88	0.93
chrI	23001	23250	1.03	0.96	1.01	0.98	0.97	0.95	0.95	0.92	0.9	0.95
chrI	23251	23500	0.94	0.95	0.95	0.97	0.97	0.98	0.98	0.91	0.92	0.87
chrI	23501	23750	0.86	1.05	0.98	0.99	0.97	1.02	1.06	0.86	0.88	0.83
chrI	23751	24000	0.87	1.1	0.94	1.01	0.99	0.99	1.02	0.9	0.87	0.88
chrI	24001	24250	0.95	0.99	0.94	0.92	0.96	0.91	0.94	0.92	0.93	0.93
chrI	24251	24500	0.99	1.01	0.98	0.96	0.98	0.91	0.9	0.94	0.96	0.96
chrI	24501	24750	1.01	1.02	0.99	1	1	0.93	0.88	0.95	0.91	0.95
chrI	24751	25000	1	0.98	0.98	0.89	0.96	0.95	0.88	0.95	0.9	0.95
chrI	25001	25250	0.99	0.97	0.98	0.91	0.98	0.94	0.87	0.96	0.92	0.95
chrI	25251	25500	0.96	0.99	1.02	0.96	0.99	0.92	0.88	0.97	0.97	1.01
chrI	25501	25750	0.99	0.98	0.94	0.83	0.89	0.91	0.87	0.95	0.97	0.99
chrI	25751	26000	1.07	1.02	0.89	1.4	1.01	0.93	1	1.05	1.02	1.04
chrI	26001	26250	1.04	0.96	0.95	1.22	1.08	1.03	0.89	1.01	1.05	0.93
chrI	26251	26500	0.98	0.94	1.02	1.2	1.32	1.01	0.89	1.02	1	0.87
chrI	26501	26750	0.98	1.01	1.06	1.23	0.95	0.98	0.88	1.05	0.97	0.97
chrI	26751	27000	1.03	0.97	1.05	1.02	0.97	0.98	0.93	0.99	0.97	0.97
chrI	27001	27250	1.06	0.98	1	0.98	0.98	0.99	0.94	0.97	0.97	0.98
chrI	27251	27500	0.99	1.02	0.97	0.92	0.99	0.98	0.91	0.95	0.98	0.95
chrI	27501	27750	0.99	0.95	0.96	0.97	0.96	1.03	0.95	0.93	0.95	0.93
chrI	27751	28000	0.98	1.02	0.96	0.99	1.04	1	0.97	0.99	0.94	0.94
chrI	28001	28250	1.02	1.05	0.97	1.02	1.02	1.03	1.06	0.97	0.92	0.9
chrI	28251	28500	1.02	1.01	1.05	1.02	1	1.05	1.06	0.95	0.92	0.95
chrI	28501	28750	1.02	1.01	1	1.02	0.98	1	1.05	0.96	0.92	0.91
chrI	28751	29000	1.01	1.08	0.96	1.01	1.01	1.01	1.07	0.98	0.94	0.91
chrI	29001	29250	1.04	1.02	0.97	1	1.02	1.02	1.04	0.95	0.91	0.89
chrI	29251	29500	1.07	1.1	0.94	1.06	1.02	1	1.07	0.97	0.91	0.94
chrI	29501	29750	1.06	1.17	1	1.09	1.03	1.06	1.09	0.96	0.9	0.94
chrI	29751	30000	1.03	1.23	1.05	1.07	1.01	1.07	1.13	0.97	0.91	0.94
chrI	30001	30250	1.02	1.27	1.09	1.03	1.02	1.09	1.2	0.99	0.89	0.95
chrI	30251	30500	0.98	1.35	1.1	1	1.04	1.05	1.18	0.97	0.9	0.92
chrI	30501	30750	1	1.4	1.1	1.02	1.05	1.06	1.19	0.94	0.93	0.93
chrI	30751	31000	0.87	1.47	1.06	1.01	1.06	1.1	1.26	0.95	0.9	0.9
chrI	31001	31250	0.84	1.44	1.02	1.1	1.02	1.11	1.26	0.94	0.92	0.85
chrI	31251	31500	0.89	1.37	1.01	1.08	0.98	1.08	1.23	0.96	0.98	0.87
chrI	31501	31750	0.95	1.32	0.98	0.99	0.95	1.01	1.16	0.96	0.98	0.95
chrI	31751	32000	0.97	1.29	0.99	0.95	0.97	1	1.09	0.97	0.96	0.98
chrI	32001	32250	0.96	1.25	0.98	0.94	0.99	1	1.07	0.97	0.94	1
chrI	32251	32500	0.99	1.24	1.01	0.98	1.01	1.03	1.04	1	0.96	1
chrI	32501	32750	0.97	1.19	0.98	1.02	1	0.98	1.08	0.98	0.98	1
chrI	32751	33000	0.99	1.32	0.95	1.24	0.93	1.06	0.94	0.95	1.16	1.02
chrI	33001	33250	0.95	1.06	1.05	1.12	0.99	1.04	1.08	0.96	0.94	0.96
chrI	33251	33500	0.97	1.04	1.04	1.03	1.03	1.03	1.04	0.97	0.91	0.96
chrI	33501	33750	0.99	1.02	1.05	0.94	1	0.95	0.99	0.98	0.94	0.93
chrI	33751	34000	1	1.02	1.03	1.03	1	0.95	0.98	1	0.96	1
chrI	34001	34250	0.99	0.98	1	1	1.01	0.99	0.96	0.99	0.98	0.99
chrI	34251	34500	1.02	1	1.08	1	0.98	0.99	0.94	0.96	0.98	0.96
chrI	34501	34750	1.02	1.01	1.02	1.02	0.95	0.98	0.97	1.01	0.95	0.99
chrI	34751	35000	0.97	0.95	1.03	1.02	0.97	0.97	0.97	0.98	0.92	0.94
chrI	35001	35250	0.98	0.95	1.01	1.01	1.03	1	0.98	0.96	0.93	0.94
chrI	35251	35500	1.01	1.02	1.01	0.97	1.03	0.99	0.91	0.97	0.93	1
chrI	35501	35750	1.02	1.01	1	0.93	1.01	0.94	0.91	0.99	0.94	0.98
chrI	35751	36000	0.99	0.98	1.02	0.91	1.04	0.94	0.91	0.99	0.98	0.94
chrI	36001	36250	0.94	0.97	0.99	0.92	1.01	0.96	0.88	0.95	0.91	0.94
chrI	36251	36500	0.99	0.92	0.92	1	1.03	1.03	0.94	0.94	0.92	0.92
chrI	36501	36750	0.96	0.94	0.96	1.01	1.01	1.02	0.93	0.92	0.93	0.92
chrI	36751	37000	1.01	0.96	0.91	0.98	1.01	1.01	0.94	0.93	0.94	0.94
chrI	37001	37250	0.98	0.96	0.95	0.99	1	1.02	0.95	0.92	0.96	0.93
chrI	37251	37500	0.93	0.91	0.95	1.06	1.03	1.01	0.96	0.96	0.95	0.91
chrI	37501	37750	0.98	0.95	1.02	0.99	1	0.98	0.99	0.95	0.95	0.96
chrI	37751	38000	1.02	0.99	1.01	0.94	1.02	0.99	0.98	1	0.96	0.94
chrI	38001	38250	1.08	1.02	1.03	0.96	0.97	0.99	0.97	0.97	1	0.95
chrI	38251	38500	1.02	1	1.04	0.96	0.96	0.96	0.93	0.98	1	0.96
chrI	38501	38750	1.01	0.96	1.03	0.95	1	0.97	1	0.94	0.96	0.94
chrI	38751	39000	0.98	0.95	1	0.98	1.02	0.98	1.06	0.96	0.91	0.95
chrI	39001	39250	0.94	1	0.99	1.05	1.05	0.96	1.09	0.96	0.9	0.89
chrI	39251	39500	0.97	0.97	1.05	1.04	1	0.99	1.05	0.95	0.96	0.94
chrI	39501	39750	1.01	1	1.02	0.97	1.01	0.97	1.05	0.97	0.91	0.94
chrI	39751	40000	1.02	1.01	1.04	1	1.03	1.01	1.07	0.98	0.93	0.92
chrI	40001	40250	0.97	1.02	1.07	1.04	1.01	1.02	1.07	1	0.96	0.9
chrI	40251	40500	0.99	1.07	1.04	1.04	1	1.02	1.11	0.98	0.95	0.94
chrI	40501	40750	1	1.15	1.05	0.97	1.03	0.95	1.09	0.94	0.92	0.95
chrI	40751	41000	0.99	1.22	1.04	0.9	1.01	0.95	1.09	0.93	0.97	0.95
chrI	41001	41250	0.98	1.32	1.09	0.96	1	1	1.12	0.93	0.91	0.94
chrI	41251	41500	1.02	1.33	1.04	0.99	0.99	0.98	1.12	0.96	0.93	0.94
chrI	41501	41750	1	1.31	1.04	1.02	0.99	0.97	1.13	0.95	0.92	0.93
chrI	41751	42000	0.98	1.35	1.05	1.15	1	1.05	1.16	0.89	0.93	0.91
chrI	42001	42250	0.97	1.35	0.95	1.03	0.99	1.09	1.16	0.93	0.93	0.89
chrI	42251	42500	0.99	1.34	1.06	0.94	1.01	1	1.14	0.9	0.96	0.93
chrI	42501	42750	0.97	1.3	1.06	0.93	1.02	1.01	1.16	0.94	0.95	0.94
chrI	42751	43000	0.94	1.25	1.05	1.05	1.01	1.02	1.22	0.96	0.93	0.92
chrI	43001	43250	0.96	1.12	1.06	1.03	1	0.92	1.1	0.96	1	0.98
chrI	43251	43500	0.99	1.08	1.07	1.02	0.99	0.94	1.06	0.98	0.97	1
chrI	43501	43750	0.97	1.05	1.08	0.97	1	0.96	1.06	0.97	0.99	0.93
chrI	43751	44000	0.98	1	1.08	1.03	0.99	0.99	1.04	0.98	0.96	0.95
chrI	44001	44250	0.99	1.01	0.99	0.99	0.98	0.97	1.05	0.99	0.98	0.95
chrI	44251	44500	1.02	1.01	0.96	0.98	0.99	0.93	1.01	0.98	0.96	0.97
chrI	44501	44750	1.01	0.99	1	0.95	1	0.95	1	0.96	0.99	0.98
chrI	44751	45000	1.01	1.01	1.03	0.94	1	0.95	0.99	0.99	0.97	0.97
chrI	45001	45250	0.95	0.95	1.02	0.98	1	0.96	1.04	0.99	0.99	0.91
chrI	45251	45500	0.96	0.92	0.91	0.97	1.01	0.95	1.04	0.99	0.95	0.92
chrI	45501	45750	0.95	0.96	0.88	0.99	1.03	1.02	1.02	0.96	0.91	0.94
chrI	45751	46000	0.98	0.97	0.94	1.04	1.02	1	0.98	0.96	0.96	0.95
chrI	46001	46250	0.99	0.99	0.98	1	1	0.99	0.93	0.96	0.95	0.98
chrI	46251	46500	0.99	1	1.03	0.94	1	0.89	0.94	0.97	0.99	0.98
chrI	46501	46750	0.97	0.98	1	0.98	0.99	0.95	0.93	0.97	0.94	0.97
chrI	46751	47000	1.01	0.97	1.03	0.98	1.01	0.99	0.97	0.95	0.94	0.9
chrI	47001	47250	1.07	0.97	1.03	0.93	1.04	1.01	0.91	0.91	0.92	0.93
chrI	47251	47500	1.06	0.98	1.01	0.94	1.01	0.97	0.92	0.94	0.91	0.94
chrI	47501	47750	1.01	0.98	1.03	0.89	1	0.94	0.95	0.95	0.96	0.94
chrI	47751	48000	1	0.97	0.97	0.93	0.97	0.92	0.89	0.98	1	0.97
chrI	48001	48250	0.98	0.93	0.93	0.97	0.95	0.91	0.89	0.92	0.94	0.97
chrI	48251	48500	1	0.97	0.96	0.98	1.02	0.93	0.89	0.95	0.94	0.91
chrI	48501	48750	1.01	0.96	0.98	0.93	0.98	0.9	0.87	0.95	0.96	0.95
chrI	48751	49000	1	0.93	1.03	1.02	0.99	0.97	0.95	0.98	0.95	0.93
chrI	49001	49250	1	0.91	0.97	1.01	0.98	0.98	0.93	0.97	0.96	0.93
chrI	49251	49500	0.97	0.95	0.96	1.02	1.01	0.96	0.95	0.96	0.92	0.91
chrI	49501	49750	0.95	0.97	0.95	0.97	0.98	0.95	0.94	0.99	0.9	0.91
chrI	49751	50000	0.94	0.94	0.98	0.99	0.96	0.95	0.95	0.94	0.92	0.92
chrI	50001	50250	0.96	0.93	0.93	0.93	0.97	0.97	0.86	0.94	0.96	0.93
chrI	50251	50500	0.94	0.93	0.98	1	0.98	0.97	0.89	0.94	0.96	0.93
chrI	50501	50750	0.94	1.02	1.01	1.04	0.99	0.96	0.95	0.91	0.92	0.93
chrI	50751	51000	0.98	1.02	1.02	1.04	0.99	0.99	0.98	0.95	0.93	0.91
chrI	51001	51250	1	0.95	0.98	0.96	0.99	0.94	0.94	0.92	0.98	0.96
chrI	51251	51500	0.97	0.95	0.98	0.92	0.99	0.94	0.92	0.96	0.97	0.97
chrI	51501	51750	0.96	0.98	0.98	0.99	1.01	0.95	0.94	0.96	0.94	0.95
chrI	51751	52000	0.94	0.95	1.01	0.94	1	0.95	0.91	1	0.92	0.9
chrI	52001	52250	0.96	0.94	1.07	0.94	1	0.95	0.93	1	0.91	0.92
chrI	52251	52500	0.99	0.95	1.02	0.96	1.03	0.95	0.91	0.97	0.97	0.91
chrI	52501	52750	1	0.94	0.98	0.96	1.01	0.92	0.89	0.99	0.96	0.97
chrI	52751	53000	1	0.95	0.93	1.02	1.01	0.95	0.94	0.98	0.93	0.92
chrI	53001	53250	1.02	1	0.98	0.96	1.02	0.92	0.9	0.95	0.94	0.94
chrI	53251	53500	0.99	0.97	1.01	0.94	0.98	0.9	0.91	0.98	0.96	0.95
chrI	53501	53750	1.03	1	1.05	0.9	0.97	0.92	0.92	0.97	0.95	0.95
chrI	53751	54000	1.03	1	1.02	0.98	0.98	0.93	0.93	0.98	0.97	0.94
chrI	54001	54250	1.02	0.97	1.03	0.96	0.98	0.92	0.94	0.95	0.92	0.93
chrI	54251	54500	1	1	1.02	0.94	0.99	0.92	0.96	0.93	0.94	0.91
chrI	54501	54750	1	1.01	1.01	0.95	1.01	0.87	0.96	0.96	1	0.93
chrI	54751	55000	0.94	0.97	0.94	1.04	1.02	0.98	0.95	0.97	0.96	0.93
chrI	55001	55250	0.94	0.97	1.02	1.01	1.02	0.96	0.96	0.92	0.86	0.91
chrI	55251	55500	0.96	1.02	1	1.01	1.02	1	0.96	0.9	0.89	0.96
chrI	55501	55750	0.84	1.08	1	1	1	1.03	0.94	0.91	0.91	0.93
chrI	55751	56000	0.91	1.06	1.03	1.01	0.99	0.98	0.97	0.93	0.91	0.91
chrI	56001	56250	0.92	0.96	1.04	1	1.02	0.91	0.92	0.95	0.93	0.96
chrI	56251	56500	0.97	0.92	1.06	0.98	1.01	0.97	0.93	0.97	0.89	0.96
chrI	56501	56750	0.97	0.97	1.07	0.96	0.97	0.96	0.91	0.96	0.93	0.94
chrI	56751	57000	0.94	0.98	1.1	1.04	0.98	0.95	0.9	0.94	0.95	0.97
chrI	57001	57250	1	0.98	1.06	0.98	0.95	0.92	0.91	0.92	0.95	0.96
chrI	57251	57500	1.01	0.98	1.06	0.98	0.96	0.93	0.92	0.95	0.94	0.96
chrI	57501	57750	1.02	0.98	0.98	0.88	1.01	0.95	0.93	1	0.92	0.97
chrI	57751	58000	1.01	1	0.96	0.92	1	0.94	0.92	0.98	0.96	0.92
chrI	58001	58250	0.98	0.98	0.92	0.91	0.99	0.94	0.89	1.01	0.96	0.95
chrI	58251	58500	0.99	1	0.91	0.95	0.95	0.91	0.9	1.01	0.94	0.97
chrI	58501	58750	1	0.97	1.02	0.92	0.96	0.95	0.93	0.99	0.92	0.94
chrI	58751	59000	1.04	0.97	1.01	0.87	0.98	0.92	0.89	0.97	0.9	0.99
chrI	59001	59250	1	1	0.98	0.91	0.98	0.91	0.86	0.98	0.92	1
chrI	59251	59500	0.99	0.99	0.96	0.95	0.99	0.9	0.89	0.96	0.96	0.99
chrI	59501	59750	0.95	0.99	0.96	0.94	0.99	0.87	0.87	0.99	0.96	0.98
chrI	59751	60000	0.96	0.95	0.98	0.98	0.97	0.88	0.87	0.94	0.96	1.03
chrI	60001	60250	0.97	0.97	0.94	0.98	0.97	0.87	0.86	0.95	0.93	1
chrI	60251	60500	0.95	1	0.94	1.01	0.97	0.92	0.88	0.98	0.94	0.95
chrI	60501	60750	0.93	0.97	1.01	0.92	0.95	0.91	0.92	0.97	0.93	0.99
chrI	60751	61000	0.96	1.06	0.96	0.91	0.95	0.89	0.9	0.97	0.94	1
chrI	61001	61250	1	1	0.96	0.88	1.01	0.91	0.92	0.99	0.94	0.98
chrI	61251	61500	0.96	1.03	0.96	0.84	0.98	0.92	0.91	0.96	0.93	0.97
chrI	61501	61750	0.95	0.98	1	0.87	0.99	0.92	0.87	0.99	0.93	0.99
chrI	61751	62000	0.97	0.98	1.03	0.94	0.97	0.9	0.89	1	0.93	0.97
chrI	62001	62250	0.97	1.02	1	0.93	0.96	0.92	0.89	1.01	0.95	0.93
chrI	62251	62500	1	0.98	1	0.91	0.94	0.89	0.86	0.96	0.97	0.95
chrI	62501	62750	1	0.94	1.03	0.94	0.96	0.9	0.84	0.94	0.99	0.94
chrI	62751	63000	1.03	0.93	0.99	0.83	0.95	0.88	0.9	0.94	0.96	0.99
chrI	63001	63250	1.01	0.96	1.06	0.87	0.96	0.91	0.91	0.97	0.98	0.98
chrI	63251	63500	1.05	0.96	1.04	0.95	0.96	0.91	0.86	1	0.93	0.98
chrI	63501	63750	1.02	0.99	1	0.89	0.96	0.9	0.9	0.96	0.89	0.96
chrI	63751	64000	0.99	0.93	0.97	0.93	1.01	0.9	0.93	0.94	0.89	0.91
chrI	64001	64250	1.01	0.95	0.97	0.96	1.03	0.94	0.98	0.94	0.89	0.93
chrI	64251	64500	1.03	1	0.97	0.95	1.01	0.95	0.96	0.97	0.86	0.93
chrI	64501	64750	1	0.93	0.95	0.95	1	0.91	0.92	0.97	0.91	0.91
chrI	64751	65000	0.98	0.95	0.97	0.94	0.97	0.97	0.91	0.96	0.94	0.96
chrI	65001	65250	0.94	0.98	0.97	0.94	0.97	0.95	0.92	0.95	0.96	0.89
chrI	65251	65500	0.96	0.98	0.92	0.92	0.96	0.99	0.96	0.95	0.92	0.88
chrI	65501	65750	0.92	1.03	0.96	1.01	1.18	1.01	0.98	0.94	0.88	0.87
chrI	65751	66000	0.97	0.96	0.97	1.02	0.98	0.95	0.97	1	0.95	0.93
chrI	66001	66250	0.98	0.96	1.01	0.93	0.98	0.92	0.9	0.98	0.93	0.97
chrI	66251	66500	0.97	0.98	1.02	0.98	0.99	0.96	0.92	0.98	0.92	0.94
chrI	66501	66750	0.97	0.92	0.98	0.97	1.01	0.94	0.93	0.95	0.94	0.91
chrI	66751	67000	0.98	0.92	1.03	0.9	0.96	0.98	0.96	0.96	1.01	0.95
chrI	67001	67250	0.97	0.95	1.01	0.89	1	0.92	0.97	0.96	0.98	1
chrI	67251	67500	1	0.94	1	0.95	0.99	0.91	0.96	0.96	0.98	0.98
chrI	67501	67750	1.03	0.97	1.02	0.94	1	0.96	0.95	0.95	0.97	0.93
chrI	67751	68000	1.02	0.96	1.04	0.92	1.01	1	1.03	0.96	0.97	0.89
chrI	68001	68250	1.01	0.96	0.94	0.94	1	0.96	1.03	0.95	0.97	0.92
chrI	68251	68500	1.01	1.04	0.98	0.9	0.98	0.91	0.96	0.99	0.99	0.96
chrI	68501	68750	0.99	1.09	1.01	0.92	0.96	0.97	1.02	1.01	0.97	0.95
chrI	68751	69000	0.99	1.17	0.98	0.92	0.97	0.96	1.02	0.96	0.93	0.98
chrI	69001	69250	0.97	1.16	0.94	0.93	0.99	0.99	1.04	1	0.98	0.97
chrI	69251	69500	0.99	1.2	0.92	0.99	0.96	0.98	1.04	1	0.97	0.96
chrI	69501	69750	1.02	1.22	0.88	0.97	0.97	1	1.13	0.94	1.01	0.92
chrI	69751	70000	1.02	1.24	1.01	0.95	1	1.03	1.16	0.96	0.96	0.92
chrI	70001	70250	1.01	1.24	1.05	0.93	0.97	1.04	1.12	0.97	0.92	0.94
chrI	70251	70500	0.96	1.23	1.06	0.96	0.95	1	1.13	0.96	0.97	0.94
chrI	70501	70750	0.93	1.22	1	1	0.99	0.97	1.13	0.97	0.95	0.94
chrI	70751	71000	0.89	1.19	0.93	0.98	1.01	1.05	1.12	0.97	0.97	0.93
chrI	71001	71250	0.94	1.11	0.94	0.94	0.99	1.01	1.09	0.96	0.93	0.96
chrI	71251	71500	1	1.13	1	0.93	0.98	1.03	1.11	0.94	0.95	1.03
chrI	71501	71750	0.97	1.15	0.95	0.93	1.02	1.06	1.09	0.92	0.91	0.96
chrI	71751	72000	1.02	1.11	0.96	0.95	1	1.03	0.99	0.92	0.93	0.96
chrI	72001	72250	0.99	1.07	1.01	0.93	1	0.97	0.99	0.94	0.94	0.96
chrI	72251	72500	0.96	1.03	0.96	0.92	0.92	1	0.97	0.95	1	1.01
chrI	72501	72750	0.97	1.05	0.97	0.91	0.93	0.98	1.01	0.98	1.03	1.02
chrI	72751	73000	1.01	1.02	0.97	0.98	0.94	0.97	0.96	1	1.03	1
chrI	73001	73250	0.97	1.06	0.95	0.96	0.95	1.01	0.98	1	0.93	0.97
chrI	73251	73500	0.83	1.1	0.9	0.97	1	1.06	1.03	0.95	0.92	0.95
chrI	73501	73750	0.9	1.02	0.96	0.97	1.03	1.09	1.05	0.9	0.93	0.93
chrI	73751	74000	0.94	0.94	1.02	0.96	1.02	1.04	1.03	0.92	0.91	0.96
chrI	74001	74250	1.02	0.98	1.07	1	1	1	0.94	0.97	0.93	0.93
chrI	74251	74500	1	0.94	1.09	1	0.99	0.95	0.98	0.98	0.92	0.97
chrI	74501	74750	0.95	0.95	1.08	1	0.97	0.97	0.97	0.95	0.91	0.97
chrI	74751	75000	0.93	0.92	0.94	1.02	0.96	0.99	0.95	0.93	0.95	0.93
chrI	75001	75250	1	0.98	1	1.02	0.95	0.94	0.94	0.97	0.92	0.94
chrI	75251	75500	1.02	0.98	1.02	0.93	0.98	0.96	0.89	0.97	0.94	0.94
chrI	75501	75750	0.98	1.02	1	0.89	0.99	0.96	0.9	0.98	0.95	0.98
chrI	75751	76000	0.98	1	1	0.84	0.94	0.93	0.89	0.95	0.92	0.96
chrI	76001	76250	1.01	0.96	1	0.86	0.94	0.93	0.88	0.96	0.97	0.97
chrI	76251	76500	0.97	0.96	1.02	0.92	0.94	0.96	0.89	0.97	0.95	0.99
chrI	76501	76750	1.01	0.97	0.94	0.89	0.96	0.93	0.91	0.97	0.93	0.98
chrI	76751	77000	0.99	0.94	0.93	0.8	0.94	0.95	0.91	0.95	0.94	0.98
chrI	77001	77250	0.96	0.98	0.95	0.85	0.97	0.96	0.9	0.95	0.96	0.97
chrI	77251	77500	0.96	0.97	1.02	0.9	0.94	0.93	0.87	1.02	0.94	0.96
chrI	77501	77750	0.96	0.98	0.98	0.9	0.97	0.91	0.88	1.01	0.87	0.98
chrI	77751	78000	0.97	0.96	0.93	0.99	0.95	0.95	0.89	0.96	0.94	0.98
chrI	78001	78250	0.98	0.99	0.98	0.98	0.94	0.97	0.94	0.94	0.92	0.92
chrI	78251	78500	1.03	0.99	1.02	0.95	0.95	0.94	0.93	0.94	0.93	0.96
chrI	78501	78750	0.99	1.02	1	0.98	0.95	0.93	0.95	0.95	0.94	0.96
chrI	78751	79000	1	0.98	1.07	0.93	0.95	0.95	0.97	0.94	0.93	0.93
chrI	79001	79250	0.98	0.97	0.99	0.87	0.97	0.92	0.96	0.97	0.94	0.89
chrI	79251	79500	0.98	0.98	0.93	0.87	0.98	0.9	0.94	1.01	0.92	0.93
chrI	79501	79750	0.96	0.97	0.98	0.91	0.96	0.98	0.91	0.99	0.92	0.93
chrI	79751	80000	1	1.01	1.04	0.91	0.94	0.99	0.93	0.98	0.95	0.93
chrI	80001	80250	1.02	0.96	1.05	0.91	0.94	0.92	0.94	0.93	0.95	0.94
chrI	80251	80500	0.92	0.95	0.99	0.94	0.98	0.91	0.92	0.95	0.93	0.91
chrI	80501	80750	0.93	0.94	0.97	0.98	0.99	0.95	0.94	0.93	0.91	0.91
chrI	80751	81000	0.99	0.97	0.92	1.01	0.97	0.9	0.89	0.93	0.93	1
chrI	81001	81250	0.95	0.96	0.96	0.95	0.95	0.89	0.89	0.96	0.96	0.98
chrI	81251	81500	0.94	1	0.99	0.93	0.94	0.92	0.94	0.97	0.96	0.94
chrI	81501	81750	0.92	1.02	1.02	0.89	0.96	0.9	0.9	0.95	0.98	0.96
chrI	81751	82000	0.95	1.01	0.94	0.96	0.97	0.93	0.96	0.95	0.95	0.93
chrI	82001	82250	0.95	0.95	0.92	0.87	0.96	0.89	0.89	0.97	0.94	0.98
chrI	82251	82500	0.95	0.9	1	0.91	0.97	0.9	0.89	0.97	0.92	0.97
chrI	82501	82750	0.93	0.95	0.99	0.9	0.96	0.93	0.95	0.99	0.93	0.9
chrI	82751	83000	0.89	0.97	0.9	0.88	0.96	0.92	0.92	0.97	0.93	0.93
chrI	83001	83250	0.95	0.95	0.9	0.95	0.97	0.95	0.99	0.98	0.89	0.91
chrI	83251	83500	0.92	0.95	0.92	0.91	0.94	0.91	0.95	0.98	0.91	0.92
chrI	83501	83750	0.95	1.04	1.03	0.87	0.93	0.91	0.9	1.02	0.92	0.92
chrI	83751	84000	0.97	1.02	1.06	0.87	0.93	0.9	0.9	1.03	0.91	0.98
chrI	84001	84250	0.96	1.03	1.03	0.84	0.94	0.9	0.93	0.98	0.9	0.96
chrI	84251	84500	0.94	0.97	0.94	0.89	0.94	0.92	0.91	0.97	0.91	0.97
chrI	84501	84750	0.98	0.97	0.91	0.93	0.97	1.02	0.95	0.92	0.95	0.98
chrI	84751	85000	0.99	0.99	0.97	0.87	0.96	0.94	0.89	0.92	0.93	0.98
chrI	85001	85250	1	0.97	1.02	0.85	0.96	0.93	0.91	0.95	0.92	0.98
chrI	85251	85500	0.95	0.93	0.98	0.93	0.96	0.9	0.91	1.01	0.93	0.95
chrI	85501	85750	0.96	0.97	0.94	0.97	0.91	0.91	0.93	1.02	0.94	0.98
chrI	85751	86000	0.98	0.99	0.98	0.97	0.92	0.9	0.94	0.98	0.97	0.96
chrI	86001	86250	1	0.99	0.99	0.94	0.94	0.92	0.92	0.92	0.93	0.97
chrI	86251	86500	1.01	0.99	1.03	0.99	0.9	0.97	0.94	0.96	0.91	0.95
chrI	86501	86750	0.94	0.97	0.93	0.99	0.95	0.93	0.97	0.95	0.94	0.97
chrI	86751	87000	0.97	0.97	0.96	0.96	0.95	0.94	0.98	0.94	0.98	0.94
chrI	87001	87250	0.99	0.92	1.02	0.97	0.96	0.95	0.93	0.96	0.94	0.93
chrI	87251	87500	0.92	0.98	1.01	0.91	0.97	0.97	0.95	0.97	0.92	0.91
chrI	87501	87750	0.94	0.97	0.94	0.92	0.98	0.91	0.96	0.95	0.98	0.9
chrI	87751	88000	0.96	1.01	0.96	0.96	0.94	0.97	1	0.93	0.94	0.92
chrI	88001	88250	0.98	1.03	1.04	0.96	0.9	0.96	0.92	0.97	0.94	0.92
chrI	88251	88500	1.01	1	1.05	0.96	0.94	0.93	1	0.94	0.96	0.92
chrI	88501	88750	1.01	1.04	1.01	0.92	0.97	0.95	0.94	0.94	0.91	0.94
chrI	88751	89000	1.03	1.05	0.98	0.97	0.97	0.96	0.93	0.91	0.94	0.91
chrI	89001	89250	1.02	1.04	1	1	0.96	1	0.94	0.91	0.9	0.89
chrI	89251	89500	1.01	1.02	1.01	0.96	0.96	1.01	0.97	0.91	0.91	0.92
chrI	89501	89750	0.98	1	0.96	0.96	0.95	0.96	0.95	0.94	0.92	0.9
chrI	89751	90000	0.95	1.01	0.94	0.96	0.95	0.97	0.92	0.96	0.93	0.88
chrI	90001	90250	0.98	1.01	0.93	0.99	0.93	0.97	0.93	0.97	0.92	0.91
chrI	90251	90500	0.97	0.98	0.93	0.93	0.95	0.93	0.96	0.95	0.93	0.94
chrI	90501	90750	0.99	0.96	0.92	0.93	0.96	0.92	0.96	0.95	0.95	0.94
chrI	90751	91000	1.03	0.95	0.91	0.94	0.94	0.94	0.96	0.93	0.91	0.93
chrI	91001	91250	0.96	1.01	1	0.93	0.92	0.94	0.93	0.93	0.96	0.92
chrI	91251	91500	0.96	1.03	1.03	0.94	0.93	0.93	0.93	0.96	0.96	0.9
chrI	91501	91750	0.96	1	0.96	0.96	0.92	0.92	0.93	0.93	0.94	0.93
chrI	91751	92000	0.96	0.97	0.9	0.88	0.9	0.93	0.96	0.96	0.96	0.94
chrI	92001	92250	0.93	0.93	0.94	0.93	0.91	0.91	0.97	0.94	0.96	0.96
chrI	92251	92500	0.92	1	0.94	0.95	0.93	0.95	0.98	0.94	0.97	0.92
chrI	92501	92750	0.88	1.02	0.98	0.96	0.96	1.01	1	0.92	0.95	0.91
chrI	92751	93000	0.9	0.99	1.04	0.91	0.95	0.97	0.96	0.93	0.93	0.92
chrI	93001	93250	0.94	0.99	1.03	0.88	0.95	0.9	0.93	0.94	0.96	0.95
chrI	93251	93500	0.92	1.03	0.96	0.86	0.92	0.94	0.87	0.95	0.91	0.98
chrI	93501	93750	0.92	1.03	0.94	0.86	0.92	0.92	0.89	0.99	0.93	0.97
chrI	93751	94000	0.96	1.07	0.94	0.87	0.93	0.94	0.87	0.95	0.89	0.97
chrI	94001	94250	0.98	1.04	0.97	0.86	0.95	0.95	0.89	0.91	0.87	0.93
chrI	94251	94500	0.93	1.05	1.03	0.93	0.95	0.96	0.97	0.94	0.87	0.88
chrI	94501	94750	0.92	0.95	1.01	0.94	0.98	0.96	0.93	0.92	0.9	0.87
chrI	94751	95000	0.96	0.95	1.02	0.94	0.97	0.96	0.97	0.92	0.94	0.9
chrI	95001	95250	0.93	0.96	1.01	0.89	0.92	0.9	0.96	0.95	0.93	0.96
chrI	95251	95500	0.9	0.96	1	0.92	0.92	0.96	0.98	0.96	0.97	0.87
chrI	95501	95750	0.89	0.98	0.89	0.94	0.95	0.96	1	0.95	0.93	0.88
chrI	95751	96000	0.93	1.02	0.97	0.95	0.94	0.91	0.98	0.94	0.93	0.93
chrI	96001	96250	0.93	1	1.01	1.01	0.99	0.99	0.98	0.92	0.91	0.92
chrI	96251	96500	0.94	0.97	0.99	0.9	0.93	0.99	0.99	0.96	0.91	0.94
chrI	96501	96750	0.96	0.98	0.94	0.89	0.94	0.95	0.97	0.97	0.93	0.94
chrI	96751	97000	0.95	0.98	0.98	0.86	0.91	0.89	0.94	0.95	0.95	0.95
chrI	97001	97250	0.98	1	1.02	0.92	0.93	0.91	0.97	0.95	0.93	0.92
chrI	97251	97500	0.97	0.98	1.02	0.99	0.96	0.97	0.98	0.94	0.92	0.94
chrI	97501	97750	0.99	0.94	0.96	0.92	0.93	0.94	0.96	0.9	0.94	0.96
chrI	97751	98000	0.96	0.96	0.93	0.97	0.93	0.97	0.97	0.94	0.94	0.91
chrI	98001	98250	0.95	0.92	0.92	0.94	0.94	0.97	0.97	0.88	0.91	0.88
chrI	98251	98500	0.94	0.95	0.96	0.91	0.96	0.95	0.95	0.87	0.93	0.87
chrI	98501	98750	0.95	0.95	0.93	0.94	0.96	0.97	0.96	0.94	0.91	0.9
chrI	98751	99000	0.94	0.96	0.96	0.94	0.97	0.95	0.93	0.95	0.93	0.91
chrI	99001	99250	0.9	0.95	0.91	0.96	0.98	0.96	0.96	0.95	0.97	0.93
chrI	99251	99500	0.94	0.97	0.98	0.98	0.98	0.97	0.93	0.96	0.98	0.93
chrI	99501	99750	0.94	0.93	1	0.92	0.94	0.96	0.95	0.97	0.94	0.96
chrI	99751	100000	0.89	0.95	1.03	0.92	0.95	0.96	0.96	0.95	0.96	0.92
chrI	100001	100250	0.91	0.99	0.99	0.97	0.93	0.97	0.94	0.91	0.96	0.94
chrI	100251	100500	0.94	0.97	1.07	0.91	0.94	0.91	0.92	0.95	0.93	1.01
chrI	100501	100750	0.97	1.01	0.98	0.86	0.95	0.91	0.9	0.93	0.95	0.97
chrI	100751	101000	0.98	1.01	1.04	0.86	0.95	0.89	0.92	0.97	0.94	0.96
chrI	101001	101250	0.93	1.04	1	0.9	0.94	0.96	0.95	0.95	0.93	0.94
chrI	101251	101500	0.92	1.08	0.9	0.97	0.89	1.01	1.02	0.91	0.89	0.9
chrI	101501	101750	0.92	0.99	0.95	0.92	0.91	0.98	0.97	0.93	0.93	0.9
chrI	101751	102000	0.93	1.01	0.99	0.88	0.89	0.92	0.95	0.93	0.92	0.92
chrI	102001	102250	0.96	1.03	0.99	1.02	0.92	0.94	1.02	0.96	0.92	0.93
chrI	102251	102500	0.96	0.98	0.97	0.96	0.94	0.95	0.99	0.93	0.9	0.91
chrI	102501	102750	0.95	0.94	0.98	0.94	0.97	0.91	0.96	0.95	0.92	0.95
chrI	102751	103000	0.93	1	0.93	0.94	0.93	0.95	0.95	0.93	0.91	0.93
chrI	103001	103250	0.93	0.99	0.94	0.94	0.92	0.94	0.98	0.93	0.92	0.94
chrI	103251	103500	0.91	0.99	0.96	0.93	0.93	0.94	0.92	0.92	0.9	0.95
chrI	103501	103750	0.92	0.96	0.95	0.94	0.92	0.97	0.94	0.97	0.91	0.95
chrI	103751	104000	0.91	0.97	0.97	0.89	0.91	0.98	0.99	0.95	0.9	0.97
chrI	104001	104250	1	0.97	1.01	0.89	0.94	0.94	0.98	0.94	0.92	0.95
chrI	104251	104500	1.01	1.01	1.01	0.88	0.93	0.97	0.98	0.98	0.91	0.93
chrI	104501	104750	0.99	1	0.96	0.9	0.91	0.97	1	0.95	0.95	0.91
chrI	104751	105000	0.95	0.95	0.93	0.87	0.92	0.92	0.99	0.96	0.9	0.91
chrI	105001	105250	0.93	1.01	0.97	0.89	0.93	0.93	0.91	0.94	0.95	0.96
chrI	105251	105500	0.96	1.03	0.96	0.91	0.92	0.95	0.93	0.96	0.96	0.95
chrI	105501	105750	0.94	0.94	0.97	0.86	0.92	0.94	0.95	0.95	0.98	0.95
chrI	105751	106000	0.93	0.92	0.97	0.9	0.92	0.93	0.93	0.97	0.93	0.96
chrI	106001	106250	0.92	0.91	0.95	0.92	0.91	0.94	1	0.95	0.95	0.92
chrI	106251	106500	0.93	0.98	0.95	0.87	0.9	0.9	1	0.98	0.94	0.95
chrI	106501	106750	0.94	1.01	0.91	0.84	0.91	0.89	0.93	0.94	0.98	0.95
chrI	106751	107000	0.93	0.98	0.94	0.84	0.92	0.9	0.91	0.94	0.97	0.96
chrI	107001	107250	0.94	1	0.96	0.87	0.9	0.88	0.91	0.95	0.96	0.96
chrI	107251	107500	0.92	1.03	0.96	0.88	0.91	0.9	0.95	0.94	0.93	0.93
chrI	107501	107750	0.97	1.03	1	0.93	0.94	0.89	0.91	0.95	0.9	0.93
chrI	107751	108000	0.95	1.06	0.94	0.89	0.91	0.91	0.91	0.94	0.96	0.92
chrI	108001	108250	0.93	1.02	0.97	0.89	0.89	0.92	0.92	0.97	0.99	0.95
chrI	108251	108500	0.92	1.01	0.99	0.9	0.91	0.92	0.91	0.95	0.92	0.97
chrI	108501	108750	0.9	0.99	0.99	0.85	0.91	0.93	0.93	0.92	0.94	0.93
chrI	108751	109000	0.94	0.99	0.94	0.85	0.9	0.93	0.92	0.95	0.95	0.95
chrI	109001	109250	0.96	0.99	0.91	0.87	0.9	0.93	0.9	0.99	0.93	0.96
chrI	109251	109500	0.96	1.01	0.97	0.9	0.91	0.9	0.9	0.97	0.94	0.95
chrI	109501	109750	0.98	0.96	1	0.91	0.89	0.85	0.9	0.97	0.95	0.98
chrI	109751	110000	0.95	0.92	0.96	0.92	0.89	0.88	0.91	0.96	0.95	0.93
chrI	110001	110250	1	0.96	0.95	0.92	0.92	0.89	0.93	0.93	0.95	0.92
chrI	110251	110500	0.97	0.97	0.95	0.9	0.91	0.93	0.93	0.93	0.9	0.94
chrI	110501	110750	0.9	0.9	0.88	0.95	0.89	0.95	0.97	0.89	0.91	0.94
chrI	110751	111000	0.89	1	0.92	0.86	0.89	0.91	0.92	0.94	0.93	0.95
chrI	111001	111250	0.94	0.98	0.92	0.9	0.91	0.9	0.92	0.93	0.97	0.94
chrI	111251	111500	0.98	1.02	0.97	0.92	0.93	0.88	0.91	0.93	0.96	0.93
chrI	111501	111750	1	1.02	0.98	0.88	0.88	0.86	0.91	0.95	0.9	0.94
chrI	111751	112000	0.92	1.03	0.93	0.86	0.87	0.87	0.88	0.99	0.91	0.99
chrI	112001	112250	0.94	0.98	0.91	0.86	0.9	0.86	0.9	0.95	0.91	0.97
chrI	112251	112500	0.95	1.01	0.95	0.92	0.91	0.88	0.92	0.94	0.96	0.99
chrI	112501	112750	0.95	0.97	0.94	0.9	0.86	0.9	0.89	0.96	0.95	0.99
chrI	112751	113000	0.97	0.99	0.99	0.89	0.88	0.89	0.91	0.95	0.95	0.98
chrI	113001	113250	0.97	0.96	0.95	0.9	0.89	0.9	0.9	0.92	0.98	0.97
chrI	113251	113500	1	0.97	0.94	0.86	0.89	0.91	0.88	0.97	0.97	0.99
chrI	113501	113750	0.97	1	0.94	0.86	0.89	0.91	0.91	0.96	0.98	0.98
chrI	113751	114000	0.96	0.98	0.96	0.9	0.91	0.88	0.91	0.95	1	0.97
chrI	114001	114250	0.98	1.01	0.95	0.92	0.88	0.86	0.88	0.98	0.99	0.96
chrI	114251	114500	0.96	0.98	0.94	0.87	0.89	0.89	0.9	0.96	0.95	0.99
chrI	114501	114750	0.95	0.96	0.94	0.85	0.87	0.91	0.9	0.94	0.94	0.97
chrI	114751	115000	0.99	1.02	0.96	0.85	0.89	0.9	0.87	0.95	0.93	0.99
chrI	115001	115250	0.96	1	0.92	0.81	0.89	0.86	0.91	0.99	0.96	1
chrI	115251	115500	0.94	1	1.01	0.86	0.92	0.89	0.89	0.94	0.98	0.96
chrI	115501	115750	0.96	0.96	0.92	0.86	0.9	0.9	0.89	0.93	0.94	0.95
chrI	115751	116000	0.96	1	0.9	0.86	0.87	0.9	0.89	0.93	0.96	0.94
chrI	116001	116250	0.95	1.03	0.91	0.85	0.88	0.91	0.89	0.93	0.91	0.95
chrI	116251	116500	0.93	1	0.94	0.87	0.86	0.95	0.93	0.94	0.93	0.96
chrI	116501	116750	0.94	1	0.94	0.87	0.89	0.91	0.94	0.95	0.92	0.93
chrI	116751	117000	0.97	0.96	0.99	0.87	0.88	0.93	0.91	0.92	0.92	0.96
chrI	117001	117250	0.95	0.95	1	0.9	0.92	0.92	0.93	0.93	0.89	0.95
chrI	117251	117500	0.93	0.93	0.99	0.89	0.92	0.93	0.96	0.96	0.89	0.93
chrI	117501	117750	0.88	0.98	0.94	0.93	0.9	0.95	0.98	0.98	0.88	0.92
chrI	117751	118000	0.91	1	0.98	0.92	0.89	1.01	0.94	0.96	0.89	0.92
chrI	118001	118250	0.9	1.01	0.96	0.92	0.92	0.99	0.94	0.94	0.88	0.92
chrI	118251	118500	0.88	0.96	0.87	0.99	0.89	1.06	0.97	0.9	0.89	0.89
chrI	118501	118750	0.93	0.99	0.91	0.89	0.89	0.99	0.98	0.9	0.87	0.9
chrI	118751	119000	0.92	0.97	0.98	0.88	0.89	0.99	0.99	0.91	0.91	0.92
chrI	119001	119250	0.94	0.93	0.96	0.89	0.88	0.99	0.97	0.93	0.94	0.94
chrI	119251	119500	0.95	0.98	1.01	0.8	0.85	0.99	0.95	0.89	0.88	0.93
chrI	119501	119750	0.91	0.94	0.94	0.82	0.91	1.04	0.98	0.9	0.94	0.85
chrI	119751	120000	0.9	0.94	0.96	0.87	0.88	1.04	0.99	0.91	0.92	0.88
chrI	120001	120250	0.95	0.98	0.96	0.89	0.88	1.08	0.99	0.92	0.92	0.88
chrI	120251	120500	0.91	0.94	0.9	0.9	0.88	1.03	1	0.94	0.89	0.94
chrI	120501	120750	0.95	0.95	0.94	0.85	0.88	1.06	0.99	0.91	0.9	0.95
chrI	120751	121000	0.95	0.98	0.96	0.89	0.87	1.03	1.01	0.95	0.94	0.97
chrI	121001	121250	0.99	0.96	0.94	0.9	0.85	1.1	1.03	0.9	0.96	0.95
chrI	121251	121500	0.99	1.02	0.99	0.96	0.87	1.1	1.05	0.95	0.92	0.94
chrI	121501	121750	1	1.03	0.99	0.92	0.88	1.1	1.06	0.96	0.92	0.98
chrI	121751	122000	0.96	1.07	0.95	0.89	0.89	1.11	1.05	0.95	0.9	0.96
chrI	122001	122250	0.95	1.1	0.96	0.91	0.89	1.13	1.08	0.94	0.96	0.98
chrI	122251	122500	0.96	1.1	1.02	0.89	0.9	1.16	1.16	0.98	0.94	0.93
chrI	122501	122750	1.01	1.15	1.07	0.9	0.92	1.15	1.21	0.96	0.87	0.93
chrI	122751	123000	0.97	1.19	1.1	0.9	0.9	1.17	1.18	0.92	0.89	0.94
chrI	123001	123250	0.94	1.26	1.11	0.95	0.88	1.12	1.2	0.9	0.91	0.95
chrI	123251	123500	0.94	1.27	1.1	0.98	0.87	1.12	1.15	0.9	0.95	0.98
chrI	123501	123750	0.93	1.28	1.07	1.04	0.87	1.15	1.19	0.91	0.91	0.94
chrI	123751	124000	0.95	1.38	1.09	1.03	0.89	1.15	1.2	0.93	0.92	0.96
chrI	124001	124250	0.94	1.35	1.09	0.94	0.88	1.13	1.25	0.95	0.91	0.96
chrI	124251	124500	0.88	1.33	1.01	0.96	0.9	1.2	1.26	0.92	0.93	0.9
chrI	124501	124750	0.87	1.34	1.07	1.03	0.91	1.2	1.23	0.89	0.91	0.9
chrI	124751	125000	0.94	1.33	1.08	0.93	0.87	1.15	1.18	0.93	0.91	0.98
chrI	125001	125250	0.97	1.28	1.04	0.99	0.86	1.16	1.19	0.94	0.93	0.97
chrI	125251	125500	1.02	1.31	1.08	1.01	0.86	1.17	1.23	0.91	0.93	0.97
chrI	125501	125750	0.94	1.2	1.14	0.98	0.88	1.14	1.23	0.95	0.91	0.94
chrI	125751	126000	0.95	1.23	1.07	0.9	0.9	1.13	1.19	0.93	0.93	0.96
chrI	126001	126250	0.96	1.24	1.04	0.95	0.88	1.18	1.17	0.9	0.93	0.92
chrI	126251	126500	0.99	1.13	1.04	0.99	0.88	1.13	1.16	0.9	0.9	0.92
chrI	126501	126750	0.93	1.07	1.03	0.95	0.88	1.12	1.12	0.9	0.9	0.91
chrI	126751	127000	0.93	1.04	0.96	0.96	0.87	1.13	1.15	0.92	0.89	0.96
chrI	127001	127250	0.91	1.06	1.05	0.9	0.86	1.1	1.09	0.94	0.88	0.99
chrI	127251	127500	0.91	1.08	1.02	0.88	0.86	1.07	1.04	0.93	0.91	0.97
chrI	127501	127750	0.91	1.01	0.96	0.87	0.87	1.04	1.05	0.92	0.93	0.96
chrI	127751	128000	0.9	0.94	0.92	0.82	0.86	1.06	1.03	0.95	0.9	0.97
chrI	128001	128250	0.91	0.94	0.89	0.89	0.87	1.08	1.03	0.96	0.89	0.93
chrI	128251	128500	0.92	0.92	0.9	0.86	0.85	1.07	0.97	0.94	0.9	0.92
chrI	128501	128750	0.89	0.94	0.91	0.83	0.82	1.06	0.93	0.93	0.91	0.95
chrI	128751	129000	0.88	0.97	0.93	0.84	0.84	1.07	0.94	0.92	0.92	0.96
chrI	129001	129250	0.91	0.98	0.92	0.86	0.87	1.05	0.91	0.93	0.91	0.94
chrI	129251	129500	0.92	0.95	0.99	0.85	0.86	0.97	0.91	0.92	0.95	0.98
chrI	129501	129750	0.9	1.01	0.94	0.83	0.85	0.93	0.88	0.94	0.95	0.96
chrI	129751	130000	0.97	1	0.94	0.81	0.85	0.93	0.93	0.93	0.93	0.94
chrI	130001	130250	0.97	1.01	0.91	0.81	0.83	0.92	0.9	0.87	0.9	0.95
chrI	130251	130500	0.94	0.96	0.93	0.81	0.85	0.94	0.93	0.87	0.91	1
chrI	130501	130750	0.95	0.94	0.96	0.86	0.86	0.96	0.95	0.9	0.91	0.93
chrI	130751	131000	0.92	0.98	0.87	0.82	0.84	0.92	0.9	0.9	0.93	0.93
chrI	131001	131250	0.93	0.95	0.94	0.84	0.86	0.88	0.87	0.92	0.95	0.94
chrI	131251	131500	0.94	0.96	0.9	0.81	0.86	0.89	0.85	0.91	0.94	0.97
chrI	131501	131750	0.95	1	0.91	0.8	0.85	0.89	0.87	0.91	0.9	0.97
chrI	131751	132000	0.89	1	0.92	0.83	0.84	0.9	0.87	0.9	0.91	0.97
chrI	132001	132250	0.87	0.98	0.92	0.86	0.84	0.93	0.95	0.86	0.9	0.94
chrI	132251	132500	0.92	0.94	0.93	0.81	0.83	0.88	0.93	0.86	0.94	0.97
chrI	132501	132750	0.88	0.94	0.88	0.77	0.83	0.89	0.87	0.88	0.93	0.93
chrI	132751	133000	0.89	0.91	0.87	0.75	0.82	0.91	0.89	0.88	0.89	0.93
chrI	133001	133250	0.9	0.93	0.88	0.74	0.82	0.92	0.89	0.87	0.9	0.91
chrI	133251	133500	0.87	0.93	0.92	0.75	0.83	0.9	0.91	0.89	0.87	0.95
chrI	133501	133750	0.89	0.93	1	0.81	0.82	0.93	0.94	0.85	0.85	0.92
chrI	133751	134000	0.89	0.92	0.95	0.87	0.8	0.9	0.93	0.86	0.89	0.9
chrI	134001	134250	0.85	0.94	0.88	0.89	0.82	0.93	0.97	0.85	0.9	0.88
chrI	134251	134500	0.92	0.96	0.85	0.9	0.82	0.94	0.92	0.86	0.87	0.88
chrI	134501	134750	0.91	0.92	0.92	0.83	0.82	0.92	0.94	0.86	0.87	0.9
chrI	134751	135000	0.9	0.95	0.95	0.88	0.82	0.93	0.87	0.83	0.85	0.88
chrI	135001	135250	0.86	0.97	0.9	0.9	0.83	0.95	0.91	0.83	0.85	0.89
chrI	135251	135500	0.86	0.96	0.96	0.85	0.82	0.93	0.87	0.87	0.89	0.89
chrI	135501	135750	0.89	0.94	0.96	0.78	0.81	0.91	0.88	0.85	0.91	0.9
chrI	135751	136000	0.89	0.95	0.95	0.78	0.8	0.91	0.86	0.83	0.88	0.89
chrI	136001	136250	0.94	0.99	0.92	0.81	0.84	0.9	0.9	0.85	0.86	0.9
chrI	136251	136500	0.92	0.95	0.91	0.77	0.84	0.9	0.93	0.93	0.89	0.86
chrI	136501	136750	0.87	0.96	0.9	0.81	0.81	0.91	0.93	0.9	0.91	0.85
chrI	136751	137000	0.86	0.93	0.95	0.9	0.82	0.91	0.92	0.93	0.91	0.87
chrI	137001	137250	0.85	0.91	0.95	0.78	0.81	0.87	0.89	0.91	0.89	0.92
chrI	137251	137500	0.86	0.98	0.94	0.79	0.83	0.94	0.94	0.86	0.85	0.88
chrI	137501	137750	0.87	1.12	0.93	0.79	0.86	0.97	0.99	0.85	0.86	0.86
chrI	137751	138000	0.95	1.05	0.94	0.87	0.84	0.91	0.9	0.87	0.88	0.89
chrI	138001	138250	0.93	1.02	0.93	0.85	0.85	0.86	0.91	0.88	0.89	0.91
chrI	138251	138500	0.94	1.01	0.91	0.81	0.84	0.89	0.93	0.93	0.84	0.88
chrI	138501	138750	0.91	0.95	0.91	0.86	0.86	0.87	0.98	0.95	0.85	0.87
chrI	138751	139000	0.9	0.88	0.91	0.83	0.87	0.91	0.94	0.97	0.9	0.87
chrI	139001	139250	0.86	0.87	0.89	0.76	0.88	0.92	0.92	0.94	0.97	0.95
chrI	139251	139500	0.88	0.93	0.85	0.85	0.86	0.88	0.96	0.97	0.89	0.94
chrI	139501	139750	0.96	0.96	0.86	0.76	0.84	0.81	0.88	1	0.89	0.98
chrI	139751	140000	1.02	0.96	0.93	0.82	0.88	0.9	0.88	1.01	0.93	0.98
chrI	140001	140250	1	0.94	0.9	0.8	0.89	0.95	0.87	1.03	0.97	0.97
chrI	140251	140500	1.04	0.94	0.94	0.87	0.91	0.92	0.84	1.03	1.01	0.97
chrI	140501	140750	1.06	0.96	0.93	0.82	0.92	0.91	0.82	1.08	0.99	0.96
chrI	140751	141000	1.07	0.97	0.97	0.83	0.93	0.88	0.85	1.09	0.98	0.94
chrI	141001	141250	1.06	0.97	0.94	0.82	0.94	0.9	0.9	1.07	1	0.99
chrI	141251	141500	1.03	0.92	0.99	0.79	0.95	0.9	0.91	1.1	0.98	0.93
chrI	141501	141750	1.06	0.93	0.92	0.81	0.95	0.93	0.92	1.11	1.03	0.9
chrI	141751	142000	1.04	0.92	0.94	0.82	0.96	0.91	0.91	1.17	1.08	0.97
chrI	142001	142250	1.07	0.96	0.94	0.79	0.99	0.94	0.95	1.17	1.06	0.94
chrI	142251	142500	1.08	0.91	0.93	0.82	1.04	0.98	1	1.17	1.11	0.96
chrI	142501	142750	1.06	0.93	0.94	0.84	1.07	0.98	0.94	1.21	1.16	1.01
chrI	142751	143000	1.07	0.91	0.96	0.8	1.04	0.97	0.9	1.25	1.15	1.09
chrI	143001	143250	1.07	0.91	0.91	0.9	1.07	1.04	0.98	1.22	1.13	1.04
chrI	143251	143500	1.09	0.95	0.91	0.88	1.08	1.03	1	1.22	1.1	1.04
chrI	143501	143750	1.13	0.9	0.99	0.85	1.09	1.02	0.98	1.23	1.11	1.06
chrI	143751	144000	1.13	0.9	1.04	0.87	1.09	1.02	1	1.32	1.19	1.16
chrI	144001	144250	1.12	0.94	1.02	0.89	1.1	1.02	1.03	1.34	1.25	1.17
chrI	144251	144500	1.16	0.97	1.02	0.86	1.12	1.02	1.05	1.36	1.24	1.17
chrI	144501	144750	1.16	1	1.08	0.92	1.18	1.1	1.11	1.32	1.19	1.15
chrI	144751	145000	1.21	1.02	1.09	1.02	1.17	1.08	1.11	1.38	1.2	1.2
chrI	145001	145250	1.18	1.06	1.14	1	1.16	1.11	1.04	1.39	1.23	1.19
chrI	145251	145500	1.21	1.08	1.14	1.1	1.2	1.16	1.08	1.34	1.29	1.29
chrI	145501	145750	1.23	1.1	1.06	1.06	1.21	1.11	1.09	1.34	1.3	1.32
chrI	145751	146000	1.23	1.13	1.16	1.02	1.23	1.12	1.14	1.38	1.31	1.3
chrI	146001	146250	1.2	1.17	1.15	1.04	1.26	1.18	1.21	1.4	1.31	1.25
chrI	146251	146500	1.29	1.22	1.16	1.03	1.29	1.23	1.17	1.46	1.29	1.31
chrI	146501	146750	1.29	1.22	1.21	1.06	1.27	1.23	1.17	1.4	1.31	1.32
chrI	146751	147000	1.27	1.19	1.24	1.1	1.27	1.22	1.21	1.42	1.3	1.31
chrI	147001	147250	1.23	1.2	1.29	1.17	1.26	1.21	1.23	1.44	1.31	1.36
chrI	147251	147500	1.21	1.22	1.11	1.1	1.29	1.2	1.19	1.44	1.31	1.33
chrI	147501	147750	1.18	1.22	1.07	1.15	1.33	1.2	1.19	1.45	1.35	1.33
chrI	147751	148000	1.23	1.24	1.25	1.08	1.29	1.18	1.17	1.41	1.34	1.35
chrI	148001	148250	1.25	1.21	1.29	1.07	1.24	1.22	1.22	1.42	1.35	1.34
chrI	148251	148500	1.25	1.19	1.26	1.12	1.24	1.2	1.16	1.42	1.33	1.36
chrI	148501	148750	1.21	1.23	1.21	1.11	1.25	1.12	1.21	1.4	1.32	1.3
chrI	148751	149000	1.12	1.15	1.19	1.07	1.25	1.17	1.17	1.41	1.29	1.27
chrI	149001	149250	1.19	1.12	1.13	1.09	1.22	1.15	1.12	1.41	1.24	1.25
chrI	149251	149500	1.25	1.08	1.15	1.01	1.19	1.14	1.09	1.37	1.31	1.28
chrI	149501	149750	1.25	1.09	1.17	0.94	1.2	1.12	1.07	1.35	1.27	1.28
chrI	149751	150000	1.28	1.05	1.19	1.02	1.19	1.08	1.07	1.36	1.25	1.28
chrI	150001	150250	1.29	1.04	1.12	0.93	1.17	1.05	1.13	1.36	1.29	1.23
chrI	150251	150500	1.26	0.99	1.09	0.93	1.15	1.08	1.08	1.31	1.26	1.19
chrI	150501	150750	1.22	1.01	1.06	0.97	1.12	1.09	1.02	1.31	1.22	1.18
chrI	150751	151000	1.15	0.96	1.03	0.94	1.09	1.12	1.03	1.31	1.19	1.13
chrI	151001	151250	1.11	0.91	0.93	0.93	1.07	1.11	1.04	1.29	1.19	1.07
chrI	151251	151500	1.03	0.93	0.93	0.98	1.09	1.13	1.08	1.21	1.11	1
chrI	151501	151750	0.98	0.89	0.88	0.96	1.06	1.1	1.13	1.21	1.07	0.97
chrI	151751	152000	1.05	0.89	0.84	0.86	1.08	1.05	1.01	1.21	1.14	0.97
chrI	152001	152250	1.07	0.87	0.89	0.9	1.02	1.01	0.96	1.21	1.14	0.99
chrI	152251	152500	1.09	0.87	0.97	0.83	1.02	0.96	0.9	1.21	1.1	0.95
chrI	152501	152750	1.12	0.88	0.89	0.79	0.98	0.93	0.86	1.2	1.08	0.96
chrI	152751	153000	1.1	0.92	0.93	0.8	0.98	0.93	0.91	1.18	1.08	0.97
chrI	153001	153250	1.09	0.89	0.96	0.81	0.93	0.92	0.92	1.15	1.03	0.97
chrI	153251	153500	1.08	0.89	0.93	0.78	0.92	0.92	0.88	1.16	1.03	0.97
chrI	153501	153750	1.1	0.93	0.87	0.79	0.93	0.93	0.9	1.16	1.03	0.97
chrI	153751	154000	1.05	0.94	0.89	0.87	0.92	0.94	0.94	1.15	1.03	0.9
chrI	154001	154250	1.07	0.92	0.88	0.8	0.92	0.93	0.92	1.1	0.99	0.91
chrI	154251	154500	1.1	0.9	0.89	0.76	0.9	0.93	0.86	1.07	1.02	0.92
chrI	154501	154750	1.16	0.93	0.9	0.82	0.92	0.93	0.91	1.11	1.03	0.93
chrI	154751	155000	1.11	0.88	0.89	0.81	0.93	0.95	0.89	1.12	1.02	0.95
chrI	155001	155250	1.13	0.92	0.89	0.76	0.95	0.94	0.92	1.09	1	1
chrI	155251	155500	1.16	0.93	0.89	0.75	0.94	0.96	0.91	1.13	1	0.99
chrI	155501	155750	1.13	0.92	0.9	0.74	0.96	1.03	0.96	1.17	1	0.95
chrI	155751	156000	1.13	0.88	0.91	0.78	0.97	1.03	0.99	1.15	1	0.97
chrI	156001	156250	1.15	0.92	0.96	0.81	0.98	1.09	0.96	1.18	1.05	0.97
chrI	156251	156500	1.18	0.97	0.94	0.89	1	1.11	1.03	1.18	1.01	1
chrI	156501	156750	1.13	1.03	0.94	0.87	1.03	1.12	1.03	1.15	1.02	1.01
chrI	156751	157000	1.19	1.02	0.94	0.87	1.03	1.16	1.03	1.13	1.04	1.06
chrI	157001	157250	1.22	1.03	1	0.8	1.01	1.15	1.07	1.23	1.06	1.09
chrI	157251	157500	1.2	1.09	1	0.84	1.02	1.16	1.05	1.27	1.1	1.16
chrI	157501	157750	1.16	1.1	1.06	0.91	1.02	1.19	1.08	1.17	1.07	1.17
chrI	157751	158000	1.18	1.19	1.03	0.91	1.04	1.17	1.12	1.22	1.09	1.12
chrI	158001	158250	1.2	1.19	1.12	0.95	1.04	1.2	1.17	1.24	1.06	1.14
chrI	158251	158500	1.18	1.22	1.08	0.95	1.09	1.2	1.21	1.25	1.05	1.16
chrI	158501	158750	1.2	1.28	1.12	0.88	1.1	1.22	1.18	1.28	1.02	1.2
chrI	158751	159000	1.25	1.3	1.14	0.91	1.11	1.2	1.18	1.32	1.08	1.18
chrI	159001	159250	1.25	1.34	1.18	0.92	1.1	1.23	1.22	1.29	1.05	1.18
chrI	159251	159500	1.28	1.31	1.11	0.99	1.12	1.24	1.25	1.29	1.09	1.17
chrI	159501	159750	1.31	1.33	1.08	0.98	1.14	1.25	1.25	1.28	1.08	1.2
chrI	159751	160000	1.26	1.38	1.06	1	1.17	1.36	1.25	1.24	1.04	1.18
chrI	160001	160250	1.17	1.42	1.02	0.99	1.16	1.33	1.19	1.24	1.01	1.13
chrI	160251	160500	0.98	1.24	0.92	0.99	1.02	1.14	1.07	1	0.94	1.02
chrI	160501	160750	0.88	1.11	0.97	1	0.97	1.06	1.04	0.94	0.89	0.95
chrI	160751	161000	0.94	1.05	0.96	1	0.96	1.02	1.02	0.95	0.9	0.91
chrI	161001	161250	0.97	0.98	0.98	0.99	0.97	1.03	1.03	0.99	0.91	0.96
chrI	161251	161500	1.04	1.07	0.94	0.97	0.98	1.08	1.05	1.05	0.92	0.97
chrI	161501	161750	0.98	1.07	0.98	0.95	0.97	1.02	1.01	1.01	0.89	0.93
chrI	161751	162000	1	1.01	1.01	1	0.96	1.04	1.02	1	0.92	0.95
chrI	162001	162250	0.99	0.97	0.98	1.02	0.95	1.03	1.02	0.97	0.92	0.95
chrI	162251	162500	0.98	0.96	0.99	0.94	0.94	0.99	1.01	0.97	0.93	0.99
chrI	162501	162750	1.01	0.99	1.02	0.94	0.92	0.97	0.95	0.98	0.95	0.98
chrI	162751	163000	1	1.02	1	0.97	0.93	0.97	0.92	0.94	0.99	0.98
chrI	163001	163250	0.96	0.98	0.96	0.98	0.91	0.91	0.95	0.96	0.98	0.95
chrI	163251	163500	0.99	0.96	1.01	0.88	0.9	0.9	0.93	0.97	0.93	0.98
chrI	163501	163750	1.01	0.93	1.01	0.92	0.93	0.91	0.97	0.99	0.94	1.04
chrI	163751	164000	1	0.95	0.99	0.99	0.94	0.98	0.97	1.04	0.99	0.97
chrI	164001	164250	0.99	0.96	1.02	0.94	0.93	0.97	0.97	1.01	0.97	0.98
chrI	164251	164500	1	1.01	0.98	0.93	0.95	0.96	0.99	0.98	0.99	0.97
chrI	164501	164750	1	0.99	1.01	0.96	0.94	0.96	0.98	0.98	0.97	0.97
chrI	164751	165000	1.02	0.96	1	1	0.93	0.97	1	1	0.97	0.93
chrI	165001	165250	0.99	0.95	1	0.98	0.96	0.97	0.98	0.99	0.95	0.96
chrI	165251	165500	0.98	0.97	0.97	0.95	0.91	0.94	0.93	0.99	0.95	0.97
chrI	165501	165750	0.96	0.95	0.97	0.9	0.89	0.94	0.91	0.97	0.97	0.99
chrI	165751	166000	0.95	0.96	0.92	0.91	0.9	0.97	0.98	0.96	0.95	0.96
chrI	166001	166250	1.04	0.95	0.91	0.94	0.93	1.04	0.97	1.05	0.97	0.93
chrI	166251	166500	1.06	0.98	0.9	0.8	0.9	0.95	0.89	1.08	1.01	0.94
chrI	166501	166750	1.1	1	0.87	0.81	0.92	1	0.94	1.06	1	0.89
chrI	166751	167000	1.11	0.91	0.88	0.77	0.9	0.93	0.9	1.08	1	0.88
chrI	167001	167250	1.08	0.91	0.92	0.77	0.88	0.88	0.89	1.1	0.99	0.93
chrI	167251	167500	1.09	0.96	0.97	0.77	0.89	0.89	0.87	1.07	1.01	0.91
chrI	167501	167750	1.09	0.96	0.96	0.74	0.89	0.87	0.85	1.09	0.99	0.91
chrI	167751	168000	1.08	0.95	0.91	0.74	0.89	0.85	0.84	1.08	0.97	0.9
chrI	168001	168250	1.14	0.95	0.89	0.77	0.91	0.86	0.85	1.13	0.97	0.9
chrI	168251	168500	1.12	0.97	0.92	0.75	0.91	0.87	0.86	1.12	0.99	0.93
chrI	168501	168750	1.08	0.94	0.91	0.79	0.9	0.88	0.86	1.12	1.04	0.92
chrI	168751	169000	1.09	0.94	0.9	0.83	0.91	0.92	0.88	1.11	1.04	0.94
chrI	169001	169250	1.09	0.87	0.79	0.85	0.92	0.96	0.92	1.14	1.04	0.93
chrI	169251	169500	1.05	0.89	0.85	0.81	0.9	0.93	0.92	1.08	1	0.92
chrI	169501	169750	1.12	0.92	0.88	0.75	0.91	0.9	0.89	1.13	1.03	0.95
chrI	169751	170000	1.17	0.92	0.94	0.72	0.94	0.9	0.9	1.13	1.06	0.95
chrI	170001	170250	1.13	0.91	0.92	0.74	0.95	0.91	0.92	1.13	1.08	0.93
chrI	170251	170500	1.14	0.87	0.89	0.78	0.93	0.9	0.91	1.17	1.06	0.99
chrI	170501	170750	1.18	0.9	0.94	0.78	0.97	0.93	0.94	1.17	1.06	0.96
chrI	170751	171000	1.18	0.89	0.95	0.81	0.98	1	0.9	1.22	1.07	0.99
chrI	171001	171250	1.15	0.92	0.94	0.83	1.02	1.02	0.92	1.19	1.08	0.97
chrI	171251	171500	1.17	0.92	0.97	0.86	1.03	1.06	0.96	1.21	1.06	1.02
chrI	171501	171750	1.12	0.91	0.98	0.85	1.03	1.11	0.97	1.17	1.13	1.05
chrI	171751	172000	1.1	0.93	0.96	0.81	1.02	1.16	0.96	1.19	1.16	1.05
chrI	172001	172250	1.18	1.01	0.93	0.9	1.08	1.25	0.98	1.25	1.16	1.06
chrI	172251	172500	1.22	1.02	0.99	0.87	1.07	1.22	0.98	1.31	1.22	1.11
chrI	172501	172750	1.26	0.96	1.09	0.96	1.12	1.27	1.04	1.29	1.17	1.14
chrI	172751	173000	1.27	0.98	1.19	0.91	1.12	1.28	1.07	1.32	1.17	1.17
chrI	173001	173250	1.34	1.04	1.2	0.98	1.16	1.28	1.09	1.31	1.19	1.21
chrI	173251	173500	1.31	1.06	1.18	1	1.16	1.28	1.1	1.36	1.21	1.23
chrI	173501	173750	1.27	1.06	1.26	1.05	1.17	1.36	1.17	1.35	1.25	1.26
chrI	173751	174000	1.31	1.12	1.24	1.09	1.18	1.38	1.14	1.41	1.31	1.32
chrI	174001	174250	1.36	1.18	1.25	1.04	1.22	1.35	1.15	1.4	1.33	1.35
chrI	174251	174500	1.37	1.24	1.32	1.08	1.21	1.36	1.18	1.44	1.29	1.36
chrI	174501	174750	1.32	1.3	1.35	1.04	1.23	1.31	1.19	1.41	1.29	1.4
chrI	174751	175000	1.36	1.27	1.33	1.17	1.28	1.37	1.23	1.46	1.35	1.39
chrI	175001	175250	1.37	1.27	1.32	1.1	1.28	1.39	1.24	1.44	1.35	1.46
chrI	175251	175500	1.37	1.32	1.41	1.15	1.27	1.41	1.28	1.45	1.3	1.45
chrI	175501	175750	1.36	1.34	1.37	1.16	1.29	1.46	1.29	1.46	1.3	1.42
chrI	175751	176000	1.25	1.28	1.26	1.21	1.32	1.47	1.28	1.45	1.26	1.36
chrI	176001	176250	1.25	1.3	1.22	1.19	1.31	1.55	1.44	1.34	1.24	1.33
chrI	176251	176500	1.17	1.37	1.23	1.23	1.33	1.57	1.51	1.33	1.23	1.36
chrI	176501	176750	1.23	1.45	1.39	1.22	1.3	1.51	1.42	1.36	1.29	1.43
chrI	176751	177000	1.36	1.36	1.32	1.16	1.25	1.38	1.27	1.39	1.3	1.42
chrI	177001	177250	1.32	1.3	1.33	1.15	1.25	1.45	1.25	1.49	1.31	1.4
chrI	177251	177500	1.32	1.28	1.32	1.19	1.25	1.37	1.24	1.45	1.32	1.42
chrI	177501	177750	1.29	1.29	1.37	1.17	1.2	1.39	1.22	1.42	1.28	1.45
chrI	177751	178000	1.34	1.29	1.35	1.12	1.2	1.38	1.21	1.38	1.32	1.36
chrI	178001	178250	1.36	1.24	1.24	1.09	1.24	1.37	1.2	1.37	1.28	1.34
chrI	178251	178500	1.38	1.14	1.2	1.09	1.22	1.4	1.21	1.4	1.25	1.3
chrI	178501	178750	1.33	1.13	1.34	1.06	1.21	1.35	1.14	1.36	1.28	1.31
chrI	178751	179000	1.31	1.09	1.28	1.07	1.21	1.34	1.12	1.34	1.28	1.3
chrI	179001	179250	1.31	1.06	1.2	0.96	1.18	1.34	1.16	1.35	1.28	1.32
chrI	179251	179500	1.32	0.99	1.24	0.94	1.16	1.28	1.12	1.36	1.24	1.21
chrI	179501	179750	1.28	0.99	1.18	0.93	1.16	1.27	1.09	1.36	1.17	1.22
chrI	179751	180000	1.26	0.96	1.08	0.89	1.1	1.28	1.03	1.34	1.12	1.2
chrI	180001	180250	1.27	0.95	1.02	0.9	1.11	1.25	1.02	1.31	1.14	1.13
chrI	180251	180500	1.18	0.96	1.04	0.88	1.07	1.18	1.02	1.26	1.18	1.11
chrI	180501	180750	1.2	0.95	1.03	0.92	1.1	1.2	1	1.27	1.2	1.12
chrI	180751	181000	1.16	0.94	1.01	0.84	1.07	1.19	0.96	1.28	1.13	1.06
chrI	181001	181250	1.15	1	0.91	0.84	1.04	1.11	0.96	1.28	1.12	1.07
chrI	181251	181500	1.15	0.94	0.91	0.85	1.03	1.06	0.97	1.27	1.11	1.02
chrI	181501	181750	1.14	0.9	0.93	0.8	0.96	1.04	0.94	1.22	1.1	1.04
chrI	181751	182000	1.16	0.88	0.89	0.84	0.97	1.04	0.95	1.16	1.08	1.01
chrI	182001	182250	1.14	0.92	0.9	0.88	0.95	0.97	0.93	1.21	1.05	1
chrI	182251	182500	1.13	0.91	0.98	0.83	0.94	0.99	0.93	1.14	1.05	0.99
chrI	182501	182750	1.07	0.95	0.95	0.8	0.97	0.99	0.97	1.14	1.03	0.97
chrI	182751	183000	1.04	0.97	0.83	0.87	0.97	1.06	0.99	1.09	1.03	0.95
chrI	183001	183250	1	0.93	0.8	0.77	0.95	0.96	0.97	1.05	1.03	0.92
chrI	183251	183500	1.05	0.92	0.79	0.81	0.92	0.91	0.95	1.05	0.99	0.88
chrI	183501	183750	1.02	0.95	0.86	0.83	0.91	0.92	0.94	1.04	1.02	0.87
chrI	183751	184000	1.01	0.94	0.81	0.77	0.87	0.88	0.91	1.03	0.99	0.92
chrI	184001	184250	0.98	0.88	0.84	0.82	0.86	0.92	0.93	1.02	0.95	0.88
chrI	184251	184500	0.99	0.93	0.9	0.85	0.88	0.93	0.95	0.96	0.93	0.87
chrI	184501	184750	0.95	0.95	0.86	0.86	0.88	0.89	0.91	1	0.93	0.87
chrI	184751	185000	0.97	0.97	0.89	0.78	0.86	0.88	0.87	0.98	0.91	0.91
chrI	185001	185250	0.96	0.95	0.9	0.8	0.83	0.91	0.89	0.98	0.93	0.87
chrI	185251	185500	0.92	0.96	0.87	0.85	0.85	0.91	0.92	0.96	0.87	0.85
chrI	185501	185750	0.95	0.95	0.89	0.82	0.86	0.92	0.91	0.96	0.88	0.87
chrI	185751	186000	0.95	0.95	0.86	0.83	0.86	0.89	0.91	0.94	0.9	0.88
chrI	186001	186250	0.95	0.92	0.87	0.82	0.84	0.9	0.91	0.94	0.89	0.92
chrI	186251	186500	0.91	0.93	0.91	0.83	0.83	0.91	0.9	0.92	0.88	0.9
chrI	186501	186750	0.93	0.96	0.9	0.88	0.84	0.89	0.91	0.89	0.9	0.87
chrI	186751	187000	0.94	0.94	0.9	0.84	0.84	0.89	0.92	0.85	0.9	0.9
chrI	187001	187250	0.94	0.92	0.86	0.83	0.79	0.86	0.92	0.85	0.84	0.93
chrI	187251	187500	0.92	0.95	0.89	0.87	0.79	0.88	0.89	0.85	0.84	0.91
chrI	187501	187750	0.88	0.92	0.87	0.85	0.8	0.89	0.93	0.89	0.92	0.9
chrI	187751	188000	0.89	0.92	0.89	0.84	0.82	0.86	0.94	0.86	0.92	0.91
chrI	188001	188250	0.87	0.96	0.85	0.8	0.81	0.88	0.91	0.82	0.92	0.89
chrI	188251	188500	0.9	0.94	0.85	0.78	0.83	0.89	0.94	0.84	0.93	0.91
chrI	188501	188750	0.89	0.94	0.94	0.79	0.83	0.87	0.95	0.86	0.94	0.92
chrI	188751	189000	0.91	0.92	0.98	0.76	0.84	0.87	0.91	0.9	0.91	0.9
chrI	189001	189250	0.84	0.99	0.97	0.78	0.85	0.89	0.95	0.9	0.91	0.86
chrI	189251	189500	0.73	1	0.9	0.84	0.82	0.95	1	0.81	0.88	0.88
chrI	189501	189750	0.81	0.96	0.91	0.84	0.83	0.93	0.98	0.81	0.85	0.84
chrI	189751	190000	0.83	0.94	0.87	0.83	0.81	0.86	0.92	0.86	0.87	0.91
chrI	190001	190250	0.87	0.97	0.83	0.8	0.8	0.86	0.88	0.9	0.87	0.9
chrI	190251	190500	0.88	0.96	0.86	0.82	0.81	0.87	0.87	0.92	0.94	0.94
chrI	190501	190750	0.9	0.95	0.85	0.77	0.81	0.9	0.85	0.92	0.92	0.93
chrI	190751	191000	0.88	0.96	0.87	0.77	0.83	0.87	0.84	0.91	0.9	0.94
chrI	191001	191250	0.86	0.93	0.88	0.83	0.81	0.89	0.87	0.89	0.91	0.98
chrI	191251	191500	0.86	0.92	0.85	0.88	0.82	0.92	0.86	0.89	0.88	0.95
chrI	191501	191750	0.87	0.97	0.87	0.83	0.82	0.92	0.87	0.89	0.91	0.93
chrI	191751	192000	0.92	0.98	0.84	0.82	0.85	0.87	0.88	0.9	0.92	0.92
chrI	192001	192250	0.9	0.93	0.88	0.83	0.83	0.87	0.87	0.92	0.92	0.92
chrI	192251	192500	0.92	0.93	0.88	0.83	0.83	0.9	0.92	0.9	0.9	0.92
chrI	192501	192750	0.91	0.95	0.92	0.83	0.8	0.91	0.94	0.86	0.88	0.94
chrI	192751	193000	0.96	0.95	0.91	0.8	0.8	0.87	0.92	0.87	0.93	0.93
chrI	193001	193250	0.9	0.97	0.82	0.83	0.84	0.87	0.87	0.88	0.92	0.92
chrI	193251	193500	0.91	0.96	0.84	0.81	0.83	0.89	0.86	0.9	0.96	0.97
chrI	193501	193750	0.94	1.01	0.91	0.79	0.83	0.89	0.84	0.92	0.93	0.97
chrI	193751	194000	0.9	0.99	0.97	0.81	0.83	0.89	0.87	0.92	0.94	0.92
chrI	194001	194250	0.86	0.97	0.87	0.79	0.84	0.91	0.91	0.87	0.9	0.91
chrI	194251	194500	0.93	0.97	0.9	0.74	0.84	0.85	0.91	0.89	0.93	0.97
chrI	194501	194750	0.95	0.99	0.92	0.77	0.83	0.85	0.87	0.9	0.87	0.91
chrI	194751	195000	0.93	0.97	0.91	0.83	0.85	0.89	0.87	0.87	0.87	0.93
chrI	195001	195250	0.93	0.95	0.92	0.83	0.84	0.88	0.87	0.91	0.91	0.96
chrI	195251	195500	0.91	0.99	0.95	0.89	0.83	0.87	0.89	0.9	0.97	0.95
chrI	195501	195750	0.92	1	0.9	0.88	0.84	0.9	0.89	0.9	0.92	0.92
chrI	195751	196000	0.96	1.01	0.9	0.84	0.82	0.89	0.88	0.92	0.9	0.92
chrI	196001	196250	0.93	0.95	0.79	0.88	0.83	0.98	0.91	0.92	0.9	0.87
chrI	196251	196500	0.93	0.94	0.82	0.88	0.85	0.97	1	0.89	0.89	0.84
chrI	196501	196750	0.9	0.91	0.86	0.92	0.84	0.94	0.99	0.88	0.84	0.89
chrI	196751	197000	0.89	0.93	0.89	0.86	0.84	0.96	1	0.9	0.89	0.87
chrI	197001	197250	0.93	0.94	0.95	0.82	0.85	0.97	0.95	0.91	0.9	0.9
chrI	197251	197500	0.93	1.01	0.89	0.82	0.84	0.98	0.98	0.88	0.9	0.9
chrI	197501	197750	0.94	0.95	0.89	0.85	0.83	0.96	0.99	0.88	0.89	0.92
chrI	197751	198000	0.96	0.95	0.93	0.82	0.86	0.96	1	0.88	0.91	0.9
chrI	198001	198250	1.01	0.99	0.92	0.82	0.87	0.91	0.99	0.89	0.91	0.89
chrI	198251	198500	0.93	1.08	0.95	0.84	0.82	0.96	1.01	0.89	0.89	0.91
chrI	198501	198750	0.9	1.17	0.92	0.75	0.79	1.01	1.03	0.9	0.86	0.99
chrI	198751	199000	0.95	1.23	0.99	0.73	0.78	1.1	1.03	0.89	0.9	0.93
chrI	199001	199250	0	0	0	0	0	0	0	0	0	0
chrI	199251	199500	0	0	0	0	0	0	0	0	0	0
chrI	199501	199750	0	0	0	0	0	0	0	0	0	0
chrI	199751	200000	0	0	0	0	0	0	0	0	0	0
chrI	200001	200250	0	0	0	0	0	0	0	0	0	0
chrI	200251	200500	0	0	0	0	0	0	0	0	0	0
chrI	200501	200750	0	34.74	0	0	11.02	0.56	14.61	0.31	0	0
chrI	200751	201000	0	0	0	0	0	0	0	0	0	0
chrI	201001	201250	0.92	1.16	1.13	0.39	0.5	0.83	1.26	0.82	0.73	0.87
chrI	201251	201500	0.92	1.02	1.13	0.35	0.53	0.63	1.18	0.82	0.79	0.79
chrI	201501	201750	0	0	0	0	0	0	0	0	0	0
chrI	201751	202000	0	0	0	0	0	0	0	0	0	0
chrI	202001	202250	0	0	0	0	0	0	0	0	0	0
chrI	202251	202500	0	0	0	0	0	0	0	0	0	0
chrI	202501	202750	1.01	1.01	0.91	0.94	0.84	1.05	1.02	0.95	0.86	0.91
chrI	202751	203000	0.98	0.98	0.96	0.84	0.81	1.05	1	0.93	0.85	0.9
chrI	203001	203250	0.99	0.98	0.97	0.89	0.86	1.05	1.03	0.94	0.89	0.91
chrI	203251	203500	0.99	0.96	0.92	0.92	0.89	1.01	1.06	0.93	0.95	0.92
chrI	203501	203750	1	0.95	0.92	0.96	0.87	0.96	1.02	0.91	0.94	0.93
chrI	203751	204000	0.95	0.98	0.96	0.87	0.84	0.97	0.97	0.94	0.93	0.99
chrI	204001	204250	0.98	0.99	0.91	1.05	0.88	0.95	0.96	0.96	1	0.93
chrI	204251	204500	1.03	0.93	1.01	0.98	0.97	0.98	0.86	0.98	0.93	0.98
chrI	204501	204750	0.97	0.96	1.01	0.79	0.86	0.9	0.91	1.05	0.91	0.94
chrI	204751	205000	1	0.97	1.04	1.07	0.88	0.93	0.87	1.03	0.93	0.9
chrI	205001	205250	0.93	1.07	1.12	1.12	1.12	0.93	0.89	1.07	0.88	1.03
chrI	205251	205500	0.98	0.95	1.07	1.27	0.93	0.9	0.83	0.97	1.07	1.07
chrI	205501	205750	1.01	0.99	0.97	0.89	0.9	0.96	0.88	1	0.98	0.95
chrI	205751	206000	1.01	0.97	0.92	0.86	0.9	0.95	0.87	0.98	0.96	0.96
chrI	206001	206250	1.05	1	0.89	0.91	0.89	0.96	0.84	1.01	0.97	0.96
chrI	206251	206500	1.01	1	0.91	0.85	0.9	0.95	0.84	0.99	0.98	0.96
chrI	206501	206750	1.01	0.97	0.93	0.84	0.9	0.93	0.88	0.96	0.96	0.98
chrI	206751	207000	1.07	0.95	0.93	0.9	0.89	0.93	0.94	0.9	1	0.93
chrI	207001	207250	0.99	1.01	0.99	0.96	0.91	0.89	0.95	0.95	0.94	0.91
chrI	207251	207500	1.04	0.95	0.93	0.83	0.9	0.87	0.92	1	0.94	0.92
chrI	207501	207750	1.01	0.97	0.88	0.78	0.89	0.85	0.98	1.04	0.92	0.94
chrI	207751	208000	0.94	0.97	0.89	0.75	0.92	0.92	1	1.01	0.95	0.94
chrI	208001	208250	0.88	1.01	0.83	0.99	1.03	1.06	1	1.01	0.89	0.91
chrI	208251	208500	0.92	1	0.91	0.84	0.87	1.15	0.97	0.88	0.93	0.85
chrI	208501	208750	0.91	0.94	0.93	0.9	0.83	0.99	1.02	0.94	0.82	0.91
chrI	208751	209000	0.95	0.94	0.91	1.05	0.84	0.93	0.94	0.95	0.86	0.85
chrI	209001	209250	0.85	1.03	0.96	0.98	0.85	0.91	0.95	0.92	0.9	0.89
chrI	209251	209500	0.79	1.01	0.92	0.99	0.83	0.94	0.97	1.02	0.9	0.89
chrI	209501	209750	0.8	0.94	1.03	0.83	0.84	0.98	1.02	0.92	0.88	0.89
chrI	209751	210000	0.9	0.88	0.94	0.75	0.82	1	1.05	0.96	0.84	0.9
chrI	210001	210250	1	0.95	0.96	0.85	0.8	1	0.95	0.95	0.88	0.9
chrI	210251	210500	1.05	0.96	0.88	0.89	0.88	1.11	0.94	0.95	0.94	0.85
chrI	210501	210750	0.96	0.73	1.09	1.01	0.98	0.93	1.07	0.99	0.89	0.93
chrI	210751	211000	0.97	0.81	1.06	1	0.98	1.02	1	0.93	1.04	0.94
chrI	211001	211250	0.96	0.86	1.02	0.9	0.95	0.92	0.94	0.95	1.01	0.92
chrI	211251	211500	1.02	0.93	1.08	0.88	0.92	0.95	0.93	0.96	0.96	0.93
chrI	211501	211750	1.04	0.98	1.1	1.03	0.95	0.95	0.97	0.96	0.92	0.89
chrI	211751	212000	0.99	1.01	1.01	1.07	0.95	0.92	0.98	0.94	0.94	0.94
chrI	212001	212250	0.98	0.97	0.99	1.08	0.96	0.96	0.96	0.96	0.9	0.96
chrI	212251	212500	1.02	0.97	1.06	1.03	0.95	0.94	1	1	0.91	0.94
chrI	212501	212750	0.97	1.03	1.09	1.01	0.97	0.95	1.03	1.01	0.94	1
chrI	212751	213000	0.95	1.1	1.09	1.02	1.02	1	1.07	0.98	0.9	0.94
chrI	213001	213250	0.95	1.06	1.02	1	0.99	0.98	1.08	0.96	0.93	0.92
chrI	213251	213500	0.98	1.09	1.04	0.96	1	0.96	1.12	0.96	0.94	0.94
chrI	213501	213750	1.02	1.04	1.08	1.13	1.04	1.01	1.13	0.93	0.96	0.95
chrI	213751	214000	1	1.04	1.03	1.15	1.01	0.99	1.15	0.92	0.97	0.92
chrI	214001	214250	0.99	1.11	1.03	0.98	1	1	1.12	0.93	0.95	0.9
chrI	214251	214500	0.98	1.18	1.05	0.99	1	1	1.11	0.98	0.97	0.91
chrI	214501	214750	0.93	1.2	0.97	1.13	1.01	1.02	1.12	0.93	0.96	0.87
chrI	214751	215000	0.86	1.25	1.03	1.08	0.99	1.01	1.13	0.89	0.9	0.91
chrI	215001	215250	0.97	1.29	1.07	1.04	0.96	1.02	1.12	0.9	0.91	0.91
chrI	215251	215500	0.94	1.28	1.03	1.03	0.94	1.05	1.15	0.92	0.93	0.92
chrI	215501	215750	0.94	1.19	1.1	0.99	0.92	1.01	1.14	0.92	0.91	0.95
chrI	215751	216000	0.95	1.18	1.1	1.14	0.99	0.98	1.15	0.97	0.9	0.94
chrI	216001	216250	1.01	1.12	1.08	1.21	0.99	0.96	1.16	1	0.94	0.97
chrI	216251	216500	0.98	1.07	1.09	1.06	1.03	1	1.13	0.95	0.95	0.97
chrI	216501	216750	0.98	1.03	1.05	1	1.01	0.93	1.07	0.96	0.97	1
chrI	216751	217000	1.02	1.05	1.01	0.98	1.01	0.96	1.08	1.02	0.95	1
chrI	217001	217250	1.04	1.01	0.99	0.99	1.06	1.03	1.06	0.98	0.96	0.97
chrI	217251	217500	0.98	0.98	1.01	1.03	1.03	0.96	0.94	1	0.97	0.95
chrI	217501	217750	1	1	0.97	1.01	1	1.01	1.02	0.99	0.96	0.97
chrI	217751	218000	1.01	0.98	0.98	0.9	0.97	0.96	0.96	0.95	0.99	0.95
chrI	218001	218250	0.99	1.01	1.04	0.91	0.96	0.95	0.96	0.97	0.93	0.95
chrI	218251	218500	0.99	1.03	1.1	0.92	0.97	0.94	0.89	0.94	0.95	0.92
chrI	218501	218750	1.05	1.02	1.07	0.98	1.04	0.9	0.93	0.99	0.97	0.92
chrI	218751	219000	1.05	0.99	1.03	0.96	1.02	0.95	0.91	1.01	0.95	0.98
chrI	219001	219250	0.99	0.96	0.97	0.86	0.96	0.93	0.91	0.97	0.95	0.97
chrI	219251	219500	0.97	0.99	0.96	0.87	0.94	0.91	0.9	0.93	0.92	0.99
chrI	219501	219750	1	0.96	0.97	0.89	0.93	0.9	0.91	0.95	0.9	0.99
chrI	219751	220000	1.01	0.97	0.93	0.89	0.95	0.91	0.94	0.95	0.96	0.97
chrI	220001	220250	1.04	0.99	0.91	0.92	0.95	0.93	0.98	0.95	0.91	0.95
chrI	220251	220500	1.05	0.95	0.91	0.9	0.91	0.93	0.91	0.93	0.94	0.98
chrI	220501	220750	1.02	0.99	0.87	0.93	0.92	0.92	0.92	0.92	0.99	0.97
chrI	220751	221000	0.99	1	1.01	1	0.97	0.94	0.94	0.94	0.94	0.97
chrI	221001	221250	1.05	1.05	1.01	0.87	0.99	0.91	0.92	0.92	0.93	0.96
chrI	221251	221500	1.03	0.99	0.94	0.95	0.94	0.91	0.88	0.93	0.95	1.01
chrI	221501	221750	1.01	0.97	0.96	0.98	0.95	0.93	0.88	0.93	0.93	0.98
chrI	221751	222000	0.97	0.98	0.98	0.91	0.93	0.94	0.9	0.94	0.93	0.98
chrI	222001	222250	1	0.97	0.97	0.87	0.94	0.92	0.92	0.98	0.95	0.96
chrI	222251	222500	1	1.01	0.95	0.84	0.93	0.92	0.91	0.96	0.95	0.96
chrI	222501	222750	0.99	0.98	0.99	0.9	0.93	0.89	0.9	0.95	0.94	0.95
chrI	222751	223000	0.99	0.97	0.89	0.94	0.91	0.91	0.95	0.94	0.93	0.95
chrI	223001	223250	0.94	0.87	1.48	0.99	0.91	0.99	1.03	0.92	0.94	0.79
chrI	223251	223500	0.97	1	0.95	1	0.96	0.92	1.01	0.98	0.93	0.91
chrI	223501	223750	0.96	1.07	0.93	0.95	0.95	0.9	1.01	0.97	0.97	0.9
chrI	223751	224000	0.93	1.04	0.9	1.01	0.99	0.97	1.02	0.96	0.92	0.9
chrI	224001	224250	0.99	1.05	0.95	0.95	0.99	0.96	0.98	0.93	0.94	0.91
chrI	224251	224500	1	1.1	0.96	0.91	0.97	0.93	0.95	0.94	0.97	0.97
chrI	224501	224750	0.96	1.08	0.99	0.92	0.96	0.91	0.93	0.98	0.95	0.93
chrI	224751	225000	0.97	1.06	0.96	0.99	0.96	0.95	0.96	0.97	0.99	0.93
chrI	225001	225250	0.96	1.02	1	0.97	0.97	0.93	1.02	0.98	1.03	0.94
chrI	225251	225500	1.02	1.07	1.09	0.97	0.99	0.96	0.97	1	1.02	0.96
chrI	225501	225750	1.01	1.03	1.04	0.95	0.96	0.96	0.95	0.99	1	0.98
chrI	225751	226000	1.02	1.04	1.07	0.91	1.01	0.93	0.93	1.02	0.98	0.98
chrI	226001	226250	1.04	1.05	1.1	0.95	0.99	0.95	0.95	1.04	0.97	0.98
chrI	226251	226500	1.02	1.04	1.05	0.89	0.97	0.96	0.91	1.04	1.04	0.96
chrI	226501	226750	1.01	1.04	1.07	0.79	0.95	0.92	0.9	1.01	1.05	0.93
chrI	226751	227000	1.08	1.11	1.11	0.88	1	0.9	0.89	0.97	1.12	0.93
chrI	227001	227250	0	0	0	0	0	0	0	0	0	0
chrI	227251	227500	0.67	0	1.1	1.04	0.6	1.17	1.73	1.75	0.8	1.44
chrI	227501	227750	1.25	0.83	0.8	1.65	0.87	1.08	0.84	1.11	1.22	1.11
chrI	227751	228000	1.04	0.96	0.9	1.29	0.9	0.93	1.04	1.09	1.05	0.98
chrI	228001	228250	0.95	1.05	1.16	0.85	0.9	0.96	0.95	1.05	1.04	0.97
chrI	228251	228500	1.02	1.08	1.25	0.88	0.95	0.92	1.11	1.04	1.05	0.98
chrI	228501	228750	1.04	1.06	1.15	1.07	0.93	0.97	0.95	1.15	1.14	1.02
chrI	228751	229000	0.91	1.2	1.03	0.79	0.85	0.91	0.86	1.05	1.21	1.06
chrI	229001	229250	0.96	1.27	0.97	0.81	0.91	0.96	0.86	1.02	1.32	1
chrI	229251	229500	1.5	0.86	0.96	1.12	0.56	1.69	0.72	1.3	1.38	1.13
chrI	229501	229750	0	0	0	0	5.51	8.1	0	0	0	0
chrI	229751	230000	0	0	0	0	11.02	0	0	0	0	0
chrI	230001	230218	0.97	1.19	1.27	0.86	0.98	0.89	0.94	1.17	1.21	1.09
chrII	1	250	1.07	1.39	1.27	1.34	1.39	1.26	1.27	1.61	1.61	1.36
chrII	251	500	1.09	1.38	1.34	1.25	1.31	1.15	1.18	1.49	1.54	1.45
chrII	501	750	1.09	1.32	1.36	1.23	1.34	1.1	1.11	1.43	1.53	1.41
chrII	751	1000	1.07	1.34	1.36	1.22	1.31	1.13	1.14	1.43	1.53	1.35
chrII	1001	1250	1.04	1.39	1.38	1.22	1.36	1.17	1.14	1.51	1.54	1.39
chrII	1251	1500	1.04	1.33	1.32	1.22	1.34	1.14	1.13	1.47	1.52	1.38
chrII	1501	1750	1.03	1.34	1.28	1.27	1.37	1.15	1.12	1.47	1.57	1.4
chrII	1751	2000	1.09	1.4	1.32	1.32	1.34	1.19	1.17	1.52	1.58	1.4
chrII	2001	2250	1.07	1.32	1.33	1.24	1.32	1.13	1.09	1.48	1.58	1.37
chrII	2251	2500	1.06	1.26	1.36	1.33	1.3	1.11	1.04	1.44	1.54	1.36
chrII	2501	2750	1.06	1.26	1.38	1.26	1.32	1.08	1.07	1.4	1.47	1.33
chrII	2751	3000	1.06	1.16	1.27	1.32	1.31	1.09	1.1	1.39	1.45	1.35
chrII	3001	3250	1.04	1.15	1.29	1.24	1.27	1.09	1.07	1.38	1.48	1.33
chrII	3251	3500	1.06	1.12	1.28	1.15	1.28	1.05	1.06	1.42	1.47	1.33
chrII	3501	3750	1.07	1.12	1.25	1.08	1.24	1.08	1.05	1.4	1.45	1.34
chrII	3751	4000	1.09	1.08	1.18	1.09	1.22	1.05	1.02	1.35	1.46	1.32
chrII	4001	4250	1.02	1.05	1.25	1.12	1.22	1.03	1.03	1.34	1.42	1.32
chrII	4251	4500	1.03	1.06	1.23	1.11	1.24	1.06	1.06	1.34	1.44	1.21
chrII	4501	4750	1.1	1.06	1.19	1.16	1.26	1.08	1.04	1.34	1.32	1.22
chrII	4751	5000	1.1	1.09	1.17	1.13	1.25	1.09	1.04	1.31	1.4	1.22
chrII	5001	5250	1.02	1.08	1.18	1.25	1.29	1.09	1.1	1.3	1.38	1.16
chrII	5251	5500	1.02	1.15	1.11	1.12	1.24	1.04	1.02	1.35	1.36	1.22
chrII	5501	5750	1.03	1.19	1.14	1.09	1.18	1.07	1.04	1.33	1.34	1.25
chrII	5751	6000	1.04	1.2	1.15	1.04	1.13	1.07	1.03	1.32	1.33	1.14
chrII	6001	6250	1	1.17	1.04	0.92	1.1	1.04	1.01	1.24	1.26	1.08
chrII	6251	6500	1	1.22	1.01	1.09	1.14	1.07	1.03	1.32	1.26	1.01
chrII	6501	6750	0.98	1.28	1.05	1.07	1.13	1.09	1.05	1.31	1.25	1.02
chrII	6751	7000	1.01	1.24	1.07	1.06	1.12	1.07	1.03	1.22	1.15	1.02
chrII	7001	7250	1.05	1.18	1.05	1.03	1.12	1.04	1.01	1.21	1.16	1.05
chrII	7251	7500	1.03	1.14	1.09	1.12	1.14	1.01	1.04	1.19	1.14	1
chrII	7501	7750	1	1.12	1.04	1.11	1.13	0.97	0.99	1.18	1.13	1.02
chrII	7751	8000	0.97	1.08	1.05	1.05	1.08	0.94	0.94	1.18	1.18	1.05
chrII	8001	8250	1.03	0.99	1.06	1.05	1.06	0.98	0.96	1.18	1.15	0.99
chrII	8251	8500	1.04	1.07	1.06	0.97	1.07	0.97	0.96	1.19	1.14	0.98
chrII	8501	8750	1.06	1.06	1.11	0.98	1.04	0.98	0.98	1.16	1.1	0.93
chrII	8751	9000	1.02	1.1	1.07	0.99	1.01	1.01	0.99	1.14	1.04	0.89
chrII	9001	9250	0.88	1.09	0.98	1.06	0.99	1.03	1.01	1.06	1.03	0.89
chrII	9251	9500	0.98	1.03	0.97	1.11	0.96	1.01	1.01	1.06	1.02	0.93
chrII	9501	9750	0.97	0.93	0.98	0.92	0.98	0.97	0.95	1.14	1.02	0.94
chrII	9751	10000	0.98	0.98	0.98	0.97	1.01	0.93	1	1.1	1.03	0.98
chrII	10001	10250	0.98	0.98	0.99	1.02	0.99	0.94	0.98	1.11	1	0.96
chrII	10251	10500	1.05	1.01	0.94	1.04	0.96	0.96	0.98	1.04	1	0.95
chrII	10501	10750	1.06	1	0.92	1.05	0.94	0.97	0.93	1.02	0.96	0.95
chrII	10751	11000	1.04	1.01	1.01	0.98	0.93	0.97	0.94	1.05	1.01	0.95
chrII	11001	11250	1.05	0.98	1.01	0.93	0.96	0.91	0.93	1.03	0.99	0.94
chrII	11251	11500	1.02	0.97	1.01	0.99	0.95	0.96	1	1	0.99	0.94
chrII	11501	11750	1.08	0.93	0.98	1	0.93	0.91	0.97	1.01	1.01	0.92
chrII	11751	12000	1.01	0.97	0.94	0.97	0.93	0.9	0.94	1.04	0.98	0.97
chrII	12001	12250	1.01	1	0.93	0.97	0.93	0.93	0.99	1.01	0.96	0.98
chrII	12251	12500	0.98	1.01	1.02	0.98	0.9	0.94	0.99	0.97	0.97	0.97
chrII	12501	12750	0.98	1.01	1	0.98	0.92	0.91	0.92	0.97	0.97	0.94
chrII	12751	13000	0.98	1	0.96	0.97	0.94	0.93	0.95	0.98	0.95	0.93
chrII	13001	13250	0.97	1	1.02	1	0.96	0.98	0.96	0.98	0.91	0.92
chrII	13251	13500	1	1.01	1	1.03	0.97	0.95	0.98	0.97	0.98	0.93
chrII	13501	13750	1.01	0.98	0.98	0.97	0.95	0.94	0.96	0.97	0.96	0.93
chrII	13751	14000	0.94	0.98	0.96	0.98	0.96	0.96	0.94	0.94	0.95	0.93
chrII	14001	14250	0.99	1.03	0.88	0.95	0.95	0.96	0.96	1.01	0.95	0.93
chrII	14251	14500	1.04	1.01	0.95	0.94	0.94	0.93	0.95	0.95	0.96	0.93
chrII	14501	14750	1.02	1.01	1.02	1	0.97	0.97	0.96	0.94	0.96	0.92
chrII	14751	15000	1	0.99	1.01	0.94	0.95	0.97	0.96	0.96	0.97	0.94
chrII	15001	15250	0.93	0.99	0.9	1.01	0.95	0.95	0.94	1	0.97	0.95
chrII	15251	15500	0.95	0.97	0.9	0.96	0.91	0.92	0.94	0.97	0.94	0.95
chrII	15501	15750	1.02	0.99	0.98	1	0.92	0.94	0.92	0.97	0.98	0.94
chrII	15751	16000	0.99	0.97	1.06	1.01	0.93	0.96	0.95	0.97	0.99	0.96
chrII	16001	16250	0.98	1	1.02	1	0.96	0.96	0.93	0.94	0.91	0.93
chrII	16251	16500	0.96	0.98	0.98	1.05	0.94	0.97	0.92	0.97	0.9	0.93
chrII	16501	16750	0.99	0.99	0.99	1.02	0.94	0.94	0.95	0.93	0.91	0.96
chrII	16751	17000	0.96	0.97	1.03	1.01	0.92	0.99	0.95	0.95	0.9	0.99
chrII	17001	17250	0.98	1.01	1.06	0.98	0.93	0.9	0.94	0.91	0.93	0.98
chrII	17251	17500	0.99	0.97	1.03	1.06	0.95	0.93	0.94	0.92	0.9	0.94
chrII	17501	17750	0.94	0.95	0.95	1.01	0.95	0.96	0.95	0.94	0.92	0.94
chrII	17751	18000	0.93	0.95	0.87	1.02	0.91	0.96	0.95	0.94	0.95	0.93
chrII	18001	18250	0.94	0.96	0.95	0.98	0.92	0.97	0.92	0.93	0.92	0.92
chrII	18251	18500	1	0.94	0.99	0.95	0.9	0.96	0.9	0.93	0.98	0.93
chrII	18501	18750	0.98	0.96	0.99	1	0.95	0.94	0.93	0.96	0.97	0.94
chrII	18751	19000	0.99	0.94	1.01	0.97	0.95	0.94	0.91	0.91	0.95	0.95
chrII	19001	19250	0.99	1.01	0.95	0.94	0.96	0.94	0.9	0.93	0.98	0.92
chrII	19251	19500	1	1.03	0.98	0.94	0.96	0.96	0.92	0.93	1	0.91
chrII	19501	19750	1	0.99	0.96	0.93	0.96	0.95	0.91	0.95	0.95	0.92
chrII	19751	20000	1	1.02	0.97	1	0.91	0.93	0.92	0.92	0.96	0.94
chrII	20001	20250	0.95	1.05	0.99	1.03	0.92	0.95	0.98	0.94	0.95	0.92
chrII	20251	20500	0.95	1.05	1.02	0.99	0.94	0.96	0.93	0.97	0.94	0.95
chrII	20501	20750	0.97	1.05	1.04	0.97	0.93	0.94	0.94	0.97	0.94	0.95
chrII	20751	21000	0.99	1	0.98	0.96	0.9	0.91	0.94	0.95	0.9	0.95
chrII	21001	21250	0.95	1	0.93	0.94	0.93	0.95	0.94	0.95	0.93	0.96
chrII	21251	21500	0.92	1	0.93	0.92	0.94	1.01	0.95	0.94	0.92	0.92
chrII	21501	21750	0.9	0.92	0.98	1.05	0.93	1.02	0.98	0.92	0.94	0.9
chrII	21751	22000	0.92	0.89	0.98	1.04	0.9	1	0.95	0.96	0.97	0.89
chrII	22001	22250	0.98	0.97	1	0.97	0.94	0.94	0.93	0.93	0.99	0.94
chrII	22251	22500	1.03	0.91	0.96	0.98	0.94	0.96	0.97	0.92	0.94	0.95
chrII	22501	22750	1.02	0.92	0.96	0.94	0.94	0.92	0.96	0.97	0.93	0.93
chrII	22751	23000	1.02	0.96	0.97	0.98	0.94	0.93	0.95	0.95	0.94	0.93
chrII	23001	23250	1.03	1.01	0.98	0.97	0.94	0.93	0.93	0.99	0.94	0.93
chrII	23251	23500	1.02	0.97	1.01	1.01	0.95	0.91	0.97	0.97	0.97	0.97
chrII	23501	23750	1.02	0.97	1.01	1.01	0.97	0.94	0.98	0.93	0.98	0.95
chrII	23751	24000	0.99	0.98	0.96	0.97	0.96	0.91	0.96	0.95	0.94	0.95
chrII	24001	24250	0.96	1.03	1	0.93	0.94	0.9	0.96	0.94	0.94	0.97
chrII	24251	24500	0.95	1	0.99	0.94	0.94	0.92	0.97	0.97	0.95	1.01
chrII	24501	24750	0.96	0.99	1	0.93	0.94	0.95	0.93	0.96	0.96	0.99
chrII	24751	25000	0.97	0.96	0.96	1.02	0.92	0.99	1.01	0.96	0.92	0.91
chrII	25001	25250	1	0.98	0.96	0.98	0.93	0.92	1	0.95	0.94	0.97
chrII	25251	25500	0.99	1.09	1.03	0.99	0.93	0.91	0.96	0.96	0.92	0.95
chrII	25501	25750	1.01	1.04	1.07	0.99	0.93	0.88	0.96	0.97	0.95	0.95
chrII	25751	26000	1.01	1	1.06	0.95	0.93	0.93	0.97	0.96	0.95	0.96
chrII	26001	26250	1.02	1	1.05	0.95	0.93	0.95	1.07	0.93	0.93	0.93
chrII	26251	26500	0.99	1.01	1	0.94	0.94	0.96	1.09	0.94	0.96	0.93
chrII	26501	26750	0.97	0.97	0.99	0.97	0.93	0.93	1.12	0.94	0.98	0.95
chrII	26751	27000	0.93	1.05	1.02	0.99	0.94	0.93	1.06	0.91	0.95	1
chrII	27001	27250	0.95	1.08	1.01	1.02	0.93	0.94	1.07	0.94	0.94	0.98
chrII	27251	27500	0.94	1.13	0.96	0.93	0.92	0.95	1.01	0.92	0.95	0.98
chrII	27501	27750	1	1.18	0.97	0.94	0.92	0.98	1.04	0.93	0.96	0.98
chrII	27751	28000	1	1.24	0.97	0.93	0.92	0.94	1.03	0.97	0.96	0.95
chrII	28001	28250	1	1.23	1.01	0.97	0.92	0.93	1.06	0.98	0.98	0.99
chrII	28251	28500	1.05	1.26	1.02	0.99	0.9	0.96	1.13	0.96	0.98	0.96
chrII	28501	28750	1	1.27	1.03	1.03	0.91	1	1.13	0.95	0.92	0.97
chrII	28751	29000	1.01	1.28	1.01	1.02	0.96	1.01	1.13	0.94	0.93	0.96
chrII	29001	29250	0.95	1.31	1.03	1.01	0.95	0.98	1.08	0.92	0.94	0.92
chrII	29251	29500	0.91	1.35	1.01	1.03	0.96	0.94	1.12	0.96	0.98	0.96
chrII	29501	29750	0.93	1.35	0.95	1.04	0.96	1.03	1.19	0.97	0.95	0.92
chrII	29751	30000	1.01	1.2	0.95	1.01	0.95	1.01	1.11	0.96	0.92	0.95
chrII	30001	30250	1.01	1.13	1	0.9	0.97	1	1.02	0.97	0.94	0.98
chrII	30251	30500	1.02	1.13	1.1	0.96	0.96	0.98	0.99	0.95	0.94	0.98
chrII	30501	30750	1.02	1.08	1.04	0.98	0.94	1.02	0.99	0.97	0.89	0.94
chrII	30751	31000	1.01	1.01	1.01	0.95	0.98	1.01	1.03	0.96	0.94	0.97
chrII	31001	31250	0.97	1.03	1	0.91	0.94	1	1.02	0.92	0.99	0.96
chrII	31251	31500	0.97	0.99	1.02	0.92	0.91	0.98	1.02	0.95	0.96	0.94
chrII	31501	31750	1	1.03	1.02	0.94	0.96	1	1.01	0.97	0.99	0.97
chrII	31751	32000	1.01	1.01	1	0.96	0.98	0.97	1	0.99	0.94	0.97
chrII	32001	32250	0.98	0.97	1.02	0.96	0.94	0.96	0.97	0.96	0.92	0.96
chrII	32251	32500	0.98	0.98	1.03	0.94	0.96	0.98	0.93	0.94	0.94	0.98
chrII	32501	32750	0.97	0.97	1.01	0.94	0.93	0.97	0.94	0.94	0.9	0.94
chrII	32751	33000	0.94	0.97	0.91	0.97	1.1	0.92	0.98	0.93	1.1	0.93
chrII	33001	33250	0.93	0.97	0.94	0.98	0.88	0.91	0.98	0.95	0.95	0.96
chrII	33251	33500	0.93	0.97	0.96	0.98	0.88	0.95	0.98	0.95	0.99	0.99
chrII	33501	33750	0.94	1	0.96	1.06	0.89	1	1.02	0.93	0.92	0.91
chrII	33751	34000	0.91	0.95	0.96	0.98	0.89	0.98	0.98	0.92	0.88	0.88
chrII	34001	34250	0.89	1	1.01	0.98	0.91	0.97	1	0.94	0.91	0.9
chrII	34251	34500	0.92	1.01	1	0.99	0.94	0.97	1	0.96	0.9	0.92
chrII	34501	34750	0.95	1.04	0.97	0.95	0.95	1.02	0.99	0.94	0.92	0.94
chrII	34751	35000	0.99	1.05	1.02	0.95	0.94	1.05	1.02	0.97	0.92	1
chrII	35001	35250	0.96	1.05	1.02	1.02	0.92	1.05	1.03	0.94	0.94	0.98
chrII	35251	35500	0.95	1.1	1	1.05	0.95	1.08	1.05	0.92	0.91	0.92
chrII	35501	35750	0.85	0.96	1.03	1.04	0.96	1.1	1.01	0.91	0.88	0.89
chrII	35751	36000	0.89	0.98	1.02	1	0.93	1.05	1.01	1	0.87	0.95
chrII	36001	36250	0.94	0.97	1.08	0.93	0.95	1.04	0.97	0.97	0.92	0.99
chrII	36251	36500	0.95	0.93	1.04	0.92	0.93	0.97	0.94	0.97	0.89	0.97
chrII	36501	36750	0.9	0.92	0.89	0.92	0.9	0.95	0.91	0.97	0.91	0.93
chrII	36751	37000	0.9	0.97	0.89	0.95	0.93	0.99	0.93	0.97	0.96	0.9
chrII	37001	37250	0.94	0.96	0.99	0.89	0.91	0.96	0.95	0.93	0.91	0.97
chrII	37251	37500	1	0.99	0.97	0.99	0.92	0.92	0.94	0.93	0.97	1.03
chrII	37501	37750	1	1.03	1.04	0.95	0.94	0.89	0.96	0.97	0.95	0.98
chrII	37751	38000	0.95	1.03	1.08	0.93	0.9	0.92	0.95	0.96	1	0.99
chrII	38001	38250	0.98	1.03	1.02	0.98	0.92	0.95	0.95	0.93	0.98	0.97
chrII	38251	38500	1.01	1.01	0.96	0.91	0.92	1	0.95	0.94	0.98	0.94
chrII	38501	38750	0.93	1.02	0.98	0.91	0.96	1.06	0.96	0.95	0.9	0.93
chrII	38751	39000	0.91	1.01	0.93	1.01	1.02	1.05	1.07	0.9	0.89	0.93
chrII	39001	39250	0.93	0.96	1.03	1.04	0.98	1.02	1.06	0.96	0.88	0.96
chrII	39251	39500	0.9	0.97	1.02	0.99	0.94	0.98	1.01	0.95	0.94	0.93
chrII	39501	39750	0.94	0.95	0.99	0.95	0.92	0.95	0.93	0.98	0.96	0.95
chrII	39751	40000	0.95	0.97	0.94	0.93	0.92	0.94	0.96	0.98	0.92	0.94
chrII	40001	40250	0.93	0.98	0.93	0.91	0.9	0.97	0.99	0.92	0.92	0.96
chrII	40251	40500	0.94	0.96	0.95	0.96	0.91	0.95	1.05	0.94	0.93	0.88
chrII	40501	40750	0.91	0.95	0.96	0.98	0.91	0.99	1.1	0.94	0.9	0.88
chrII	40751	41000	0.97	1.04	0.98	0.94	0.91	1.02	1.02	0.96	0.89	0.91
chrII	41001	41250	0.94	1	0.97	0.9	0.92	0.96	0.93	0.94	0.9	0.97
chrII	41251	41500	0.98	1	0.98	0.93	0.92	0.98	0.95	0.94	0.93	0.94
chrII	41501	41750	0.98	0.97	1	0.99	0.92	0.95	0.97	0.93	0.93	0.91
chrII	41751	42000	0.99	0.97	1.02	1.01	0.9	0.94	0.98	0.96	0.91	0.95
chrII	42001	42250	0.96	1	0.98	0.94	0.89	0.96	0.92	0.95	0.94	0.96
chrII	42251	42500	0.99	0.98	0.97	0.89	0.91	0.96	0.92	0.93	0.97	0.98
chrII	42501	42750	1.01	0.95	1.03	0.92	0.93	0.94	0.98	0.98	0.98	0.98
chrII	42751	43000	0.96	1	0.94	0.97	0.91	0.94	0.96	0.95	0.93	0.95
chrII	43001	43250	0.94	1	1.04	0.95	0.92	0.93	0.95	0.91	0.97	0.93
chrII	43251	43500	0.93	1.02	0.97	0.98	0.89	0.89	0.92	0.94	0.94	0.91
chrII	43501	43750	0.94	1.03	0.99	0.92	0.92	0.92	0.9	0.94	0.94	0.94
chrII	43751	44000	0.93	0.99	0.95	0.93	0.89	0.89	0.92	0.92	0.95	0.96
chrII	44001	44250	0.9	0.97	0.86	0.97	0.96	0.93	0.93	0.93	0.94	0.92
chrII	44251	44500	0.9	0.98	0.87	0.92	0.91	0.94	0.91	0.93	0.97	0.94
chrII	44501	44750	0.95	1	0.93	0.95	0.92	0.9	0.9	0.93	0.96	0.96
chrII	44751	45000	0.95	0.98	0.93	0.93	0.91	0.93	0.93	0.92	0.95	0.96
chrII	45001	45250	0.97	0.98	0.97	0.91	0.93	0.9	0.98	0.92	0.95	0.91
chrII	45251	45500	0.93	0.98	0.92	0.86	0.9	0.88	0.94	0.93	0.93	0.92
chrII	45501	45750	0.94	1	0.91	0.91	0.93	0.92	1	0.93	0.93	0.92
chrII	45751	46000	0.92	1	0.9	0.9	0.92	0.91	0.93	0.9	0.93	0.94
chrII	46001	46250	0.89	1.02	0.89	0.94	0.97	0.9	0.87	0.93	0.92	0.96
chrII	46251	46500	0.86	1.01	0.82	0.99	0.94	0.92	0.95	0.93	0.91	0.93
chrII	46501	46750	0.9	1.01	0.87	0.93	0.9	0.92	0.98	0.94	0.94	0.94
chrII	46751	47000	0.92	0.96	0.89	0.91	0.89	0.89	0.9	0.95	0.93	0.93
chrII	47001	47250	0.94	0.95	0.87	0.88	0.91	0.89	0.95	0.93	0.94	0.96
chrII	47251	47500	0.93	1	0.92	0.93	0.95	0.91	0.95	0.95	0.95	0.97
chrII	47501	47750	0.94	1	0.98	0.96	0.91	0.9	0.89	0.93	0.97	0.96
chrII	47751	48000	0.96	1.02	0.99	0.91	0.91	0.9	0.94	0.89	0.97	0.95
chrII	48001	48250	0.98	1.03	1.03	0.94	0.89	0.91	0.92	0.92	1	0.93
chrII	48251	48500	0.98	0.97	1	0.87	0.89	0.87	0.93	0.91	0.96	0.92
chrII	48501	48750	0.96	0.97	1.02	0.92	0.9	0.88	0.95	0.93	0.95	0.92
chrII	48751	49000	0.96	0.98	1.04	0.92	0.9	0.91	0.94	0.95	0.96	0.92
chrII	49001	49250	0.96	0.94	0.97	0.9	0.9	0.98	0.99	0.93	0.97	0.91
chrII	49251	49500	0.99	0.96	0.93	0.98	0.9	0.95	0.98	0.93	0.91	0.87
chrII	49501	49750	0.94	0.96	0.98	0.9	0.91	0.92	0.94	0.9	0.91	0.9
chrII	49751	50000	0.93	0.98	0.99	0.92	0.91	0.88	0.94	0.9	0.92	0.89
chrII	50001	50250	0.97	0.98	1	0.91	0.93	0.93	0.96	0.89	0.89	0.85
chrII	50251	50500	0.92	0.98	0.94	0.93	0.93	0.93	0.93	0.91	0.93	0.89
chrII	50501	50750	0.95	0.99	0.87	0.9	0.9	0.94	0.93	0.92	0.94	0.87
chrII	50751	51000	0.93	0.98	0.93	0.9	0.92	0.95	0.95	0.92	0.93	0.87
chrII	51001	51250	0.95	0.97	0.97	0.9	0.9	0.96	0.97	0.9	0.97	0.88
chrII	51251	51500	0.95	0.95	1.02	0.92	0.92	0.95	0.93	0.92	0.95	0.92
chrII	51501	51750	0.94	0.94	0.95	0.9	0.89	0.91	0.96	0.93	0.91	0.92
chrII	51751	52000	0.98	0.99	0.91	0.85	0.91	0.91	0.95	0.92	0.9	0.92
chrII	52001	52250	0.96	0.98	0.94	0.81	0.9	0.91	0.97	0.92	0.93	0.94
chrII	52251	52500	0.93	0.95	0.98	0.88	0.91	0.92	0.96	0.95	0.93	0.91
chrII	52501	52750	0.98	0.98	0.96	0.9	0.9	0.92	0.99	0.97	0.93	0.9
chrII	52751	53000	0.9	0.98	0.96	0.94	0.92	0.95	0.96	0.97	0.93	0.9
chrII	53001	53250	0.95	0.98	0.96	0.96	0.93	0.94	0.95	0.97	0.94	0.92
chrII	53251	53500	0.98	0.97	0.97	1	0.95	0.94	0.98	0.94	0.91	0.92
chrII	53501	53750	0.98	0.93	0.96	1.01	0.94	0.93	0.97	0.98	0.92	0.89
chrII	53751	54000	0.99	0.99	1.04	0.93	0.93	0.91	0.92	0.97	0.97	0.92
chrII	54001	54250	0.99	0.97	0.99	0.95	0.95	0.89	0.95	0.97	0.94	0.87
chrII	54251	54500	0.98	0.97	0.98	0.95	0.92	0.94	0.96	1.01	0.94	0.89
chrII	54501	54750	1.02	0.99	0.95	0.95	0.96	0.93	0.95	0.99	0.95	0.91
chrII	54751	55000	1.07	0.99	0.92	0.9	0.95	0.98	0.94	0.99	0.94	0.92
chrII	55001	55250	1.06	0.97	1	0.93	0.96	0.95	0.98	1.04	0.95	0.93
chrII	55251	55500	1.05	0.98	0.94	0.94	0.94	0.99	1	1.04	0.91	0.94
chrII	55501	55750	1.07	0.98	0.97	0.88	0.96	0.98	0.98	1	0.96	0.93
chrII	55751	56000	1.01	0.99	0.92	0.89	1	1	1	1.01	0.96	0.92
chrII	56001	56250	1.02	0.98	0.92	0.9	0.99	0.94	0.99	1.08	0.94	0.92
chrII	56251	56500	1.02	0.95	0.93	0.88	0.98	0.92	0.9	1.08	1	0.94
chrII	56501	56750	1.09	0.92	0.96	0.89	0.98	0.93	0.88	1.07	1.01	0.99
chrII	56751	57000	1.13	0.95	0.95	0.88	0.99	0.96	0.89	1.1	0.96	0.99
chrII	57001	57250	1.14	1.02	1.02	0.92	1.01	1	1	1.08	0.94	0.92
chrII	57251	57500	1.16	1.03	1.12	0.93	1.01	1.03	0.95	1.11	0.96	0.92
chrII	57501	57750	1.17	0.94	1.02	0.95	1.01	1	0.9	1.13	1.01	1
chrII	57751	58000	1.16	0.92	0.97	0.99	1.08	1.04	0.98	1.16	0.97	1.01
chrII	58001	58250	1.16	0.98	0.94	1.02	1.11	1.06	1.02	1.13	0.96	1.02
chrII	58251	58500	1.21	0.97	0.89	0.98	1.1	1.11	1.02	1.21	0.97	1.02
chrII	58501	58750	1.19	1	0.99	0.95	1.09	1.17	1	1.21	0.96	1.04
chrII	58751	59000	1.28	1.05	1.07	0.9	1.1	1.17	1.02	1.2	1.02	1.09
chrII	59001	59250	1.25	1.03	1.06	0.89	1.14	1.2	1.04	1.2	1.01	1.14
chrII	59251	59500	1.2	0.99	1.05	0.88	1.15	1.24	1.03	1.24	1.07	1.16
chrII	59501	59750	1.18	1.09	1.08	1	1.2	1.27	1.09	1.27	1	1.15
chrII	59751	60000	1.17	1.04	1.15	0.99	1.18	1.28	1.06	1.32	1.01	1.18
chrII	60001	60250	1.21	1.03	1.17	0.95	1.19	1.23	1.09	1.3	1.04	1.17
chrII	60251	60500	1.23	1.1	1.19	0.99	1.24	1.33	1.13	1.29	1.07	1.17
chrII	60501	60750	1.17	1.13	1.19	1.08	1.22	1.35	1.14	1.31	1.05	1.17
chrII	60751	61000	1.2	1.17	1.16	1.07	1.25	1.38	1.2	1.32	1.04	1.22
chrII	61001	61250	1.25	1.17	1.25	1.09	1.23	1.4	1.24	1.33	1.05	1.26
chrII	61251	61500	1.23	1.26	1.25	1.13	1.23	1.31	1.2	1.35	1.04	1.3
chrII	61501	61750	1.25	1.38	1.26	1.17	1.23	1.38	1.22	1.38	1.07	1.33
chrII	61751	62000	1.31	1.36	1.27	1.19	1.25	1.37	1.24	1.39	1.1	1.35
chrII	62001	62250	1.32	1.36	1.32	1.24	1.25	1.37	1.24	1.37	1.11	1.32
chrII	62251	62500	1.32	1.45	1.35	1.18	1.28	1.41	1.27	1.41	1.1	1.34
chrII	62501	62750	1.31	1.46	1.26	1.21	1.3	1.4	1.31	1.4	1.1	1.32
chrII	62751	63000	1.27	1.34	1.28	1.21	1.31	1.38	1.28	1.39	1.15	1.31
chrII	63001	63250	1.25	1.31	1.31	1.18	1.32	1.43	1.34	1.34	1.12	1.33
chrII	63251	63500	1.25	1.33	1.45	1.22	1.29	1.47	1.35	1.35	1.09	1.38
chrII	63501	63750	1.31	1.35	1.39	1.24	1.27	1.45	1.36	1.39	1.1	1.37
chrII	63751	64000	1.31	1.31	1.32	1.25	1.31	1.42	1.3	1.37	1.08	1.34
chrII	64001	64250	1.32	1.3	1.26	1.22	1.35	1.4	1.26	1.3	1.06	1.34
chrII	64251	64500	1.25	1.25	1.26	1.18	1.26	1.43	1.23	1.33	1.09	1.33
chrII	64501	64750	1.31	1.28	1.21	1.17	1.25	1.44	1.21	1.33	1.1	1.28
chrII	64751	65000	1.29	1.26	1.24	1.05	1.2	1.38	1.17	1.35	1.11	1.26
chrII	65001	65250	1.27	1.17	1.26	1.06	1.19	1.32	1.18	1.35	1.08	1.24
chrII	65251	65500	1.26	1.08	1.27	1.07	1.21	1.35	1.13	1.3	1.09	1.3
chrII	65501	65750	1.28	1.08	1.21	1.07	1.19	1.35	1.06	1.29	1.1	1.03
chrII	65751	66000	1.31	1.11	1.13	1.02	1.18	1.27	1.06	1.29	1.1	1.21
chrII	66001	66250	1.26	1.09	1.09	0.97	1.16	1.24	1.07	1.28	1.03	1.2
chrII	66251	66500	1.25	1.08	1.15	0.95	1.19	1.19	1.03	1.24	1.04	1.17
chrII	66501	66750	1.2	1.01	1.13	0.95	1.17	1.16	1.02	1.24	1.03	1.13
chrII	66751	67000	1.06	0.99	1.05	1.07	1.19	1.2	1.05	1.2	1.01	1.06
chrII	67001	67250	1.07	1.06	1	1.01	1.13	1.18	1.05	1.23	1.04	1.04
chrII	67251	67500	1.17	1.02	1.04	0.97	1.07	1.12	0.99	1.17	1.01	1.09
chrII	67501	67750	1.18	0.99	1.04	0.89	1.07	1.09	0.97	1.16	1.08	1.06
chrII	67751	68000	1.15	0.95	1.04	0.91	1.04	1.1	1	1.14	1.05	1.03
chrII	68001	68250	1.21	0.93	0.97	1.04	1.11	1.13	1.03	1.11	0.97	0.96
chrII	68251	68500	1.16	0.92	0.95	1.06	1.08	1.07	1.07	1.16	0.95	0.97
chrII	68501	68750	1.15	0.92	0.93	0.85	0.99	1.01	0.97	1.15	0.96	1.04
chrII	68751	69000	1.19	0.96	0.95	0.91	1.02	1.01	0.93	1.11	0.92	1.02
chrII	69001	69250	1.12	0.98	0.97	0.9	1.01	0.98	0.93	1.12	0.96	1.01
chrII	69251	69500	1.07	0.99	0.93	0.92	1	1	0.95	1.13	0.97	0.95
chrII	69501	69750	1.1	0.96	0.95	1.03	1	1	0.94	1.08	0.97	0.97
chrII	69751	70000	1.11	0.97	0.97	0.96	1	0.91	0.88	1.1	1.02	0.99
chrII	70001	70250	1.1	0.98	1	0.93	1	0.91	0.9	1.1	1	1.05
chrII	70251	70500	1.05	0.99	0.97	0.91	0.99	0.92	0.88	1.07	0.98	0.99
chrII	70501	70750	1.05	0.99	0.94	0.84	0.95	0.91	0.88	1.09	0.97	0.99
chrII	70751	71000	1.06	1	0.97	0.88	0.95	0.89	0.91	1.09	0.98	0.97
chrII	71001	71250	1.07	0.91	0.94	0.9	0.97	0.89	0.96	1.04	0.97	0.99
chrII	71251	71500	1.05	0.96	0.95	0.92	0.93	0.93	0.94	1.01	1.01	0.96
chrII	71501	71750	1.03	0.98	0.94	0.94	0.95	0.94	0.95	0.99	0.98	0.95
chrII	71751	72000	1.03	0.99	0.99	0.93	0.91	0.94	0.93	1	1.04	0.94
chrII	72001	72250	1.02	0.98	0.96	0.87	0.96	0.88	0.92	0.99	1	0.93
chrII	72251	72500	1.04	0.98	0.94	0.82	0.95	0.9	0.93	1.01	0.94	0.94
chrII	72501	72750	0.97	0.98	0.88	0.83	0.92	0.9	0.89	1.01	0.96	0.98
chrII	72751	73000	0.96	0.99	0.92	0.85	0.96	0.9	0.91	0.98	0.96	0.94
chrII	73001	73250	1.01	0.98	0.91	0.9	0.95	0.95	0.94	0.94	0.91	0.91
chrII	73251	73500	1.05	0.96	0.97	0.9	0.93	0.92	0.93	0.92	0.96	0.93
chrII	73501	73750	1.03	1	0.95	0.91	0.91	0.91	0.95	0.93	0.98	0.94
chrII	73751	74000	1.03	0.99	0.96	0.88	0.89	0.86	0.91	0.93	0.94	0.94
chrII	74001	74250	1.03	0.99	0.99	0.94	0.91	0.9	0.93	0.95	0.94	0.94
chrII	74251	74500	0.99	1.01	0.98	0.9	0.9	0.88	0.89	0.94	0.91	0.94
chrII	74501	74750	0.97	0.97	0.98	0.89	0.9	0.91	0.91	0.92	0.96	0.92
chrII	74751	75000	0.98	0.99	0.95	0.93	0.94	0.95	0.93	0.95	0.95	0.92
chrII	75001	75250	0.95	1	0.93	0.92	0.92	0.91	0.9	0.93	0.91	0.93
chrII	75251	75500	0.94	0.99	0.95	0.89	0.9	0.9	0.9	0.9	0.93	0.97
chrII	75501	75750	0.96	1	0.98	0.89	0.94	0.92	0.93	0.94	0.94	0.97
chrII	75751	76000	0.95	0.95	1.1	0.9	0.91	0.94	0.93	0.94	0.93	0.94
chrII	76001	76250	0.95	0.98	1.02	0.89	0.89	0.92	0.9	0.94	0.95	0.93
chrII	76251	76500	0.95	0.99	1.01	0.91	0.91	0.94	0.93	0.95	0.98	0.92
chrII	76501	76750	0.94	0.98	1.02	0.88	0.93	0.92	0.89	0.93	0.94	0.95
chrII	76751	77000	0.98	0.99	0.96	0.91	0.93	0.92	0.91	0.93	0.95	0.91
chrII	77001	77250	0.95	0.97	0.97	0.93	0.94	0.93	0.9	0.91	0.96	0.97
chrII	77251	77500	0.93	0.97	0.96	0.96	0.91	0.9	0.93	0.92	0.97	0.95
chrII	77501	77750	0.93	0.99	0.92	0.96	0.93	0.93	0.94	0.9	0.98	0.92
chrII	77751	78000	0.97	1	0.97	1	0.95	0.95	0.93	0.89	0.93	0.91
chrII	78001	78250	0.96	0.98	0.95	0.98	0.94	0.94	0.96	0.9	0.92	0.89
chrII	78251	78500	0.97	1.01	0.96	0.98	0.93	0.95	0.94	0.95	0.88	0.85
chrII	78501	78750	0.91	1	0.98	1.02	0.94	0.94	0.98	0.92	0.88	0.86
chrII	78751	79000	0.92	0.99	0.99	1	0.92	0.94	0.96	0.93	0.91	0.88
chrII	79001	79250	0.91	0.98	0.99	0.91	0.93	0.94	0.92	0.95	0.91	0.9
chrII	79251	79500	0.84	1.01	0.98	0.96	0.95	1.01	0.95	0.92	0.93	0.89
chrII	79501	79750	0.81	1.06	0.99	0.95	0.94	1.01	0.95	0.9	0.91	0.92
chrII	79751	80000	0.75	1.1	1.05	0.96	0.93	1.01	0.98	0.9	0.94	0.86
chrII	80001	80250	0.76	1.01	0.95	0.98	0.91	0.97	1.02	0.86	0.96	0.86
chrII	80251	80500	0.84	0.97	0.98	0.98	0.91	0.99	0.99	0.85	0.92	0.9
chrII	80501	80750	0.9	0.95	0.97	0.94	0.91	0.96	1.01	0.9	0.94	0.93
chrII	80751	81000	0.91	0.95	0.94	0.93	0.88	0.94	1.02	0.9	0.88	0.92
chrII	81001	81250	0.96	0.97	0.98	0.9	0.91	0.94	0.93	0.92	0.91	0.96
chrII	81251	81500	0.97	0.94	1.01	0.9	0.91	0.92	0.9	0.93	0.93	0.92
chrII	81501	81750	0.93	0.99	1.06	0.96	0.94	0.94	0.94	0.91	0.97	0.94
chrII	81751	82000	0.92	0.96	0.99	0.91	0.93	0.95	0.99	0.91	0.96	0.96
chrII	82001	82250	0.96	0.99	0.98	0.97	0.9	0.98	0.95	0.91	0.93	0.95
chrII	82251	82500	0.96	0.97	0.96	0.97	0.91	0.97	0.94	0.94	0.92	0.96
chrII	82501	82750	0.96	0.95	0.98	0.93	0.93	0.95	0.93	0.93	0.92	0.94
chrII	82751	83000	0.96	0.96	0.98	0.92	0.9	0.91	0.93	0.92	0.96	0.96
chrII	83001	83250	0.94	0.95	1	0.92	0.9	0.89	0.88	0.93	0.94	0.94
chrII	83251	83500	0.92	0.99	1.03	0.93	0.9	0.96	0.92	0.95	0.9	0.92
chrII	83501	83750	0.88	1.03	1.03	0.89	0.9	0.95	0.94	0.94	0.91	0.96
chrII	83751	84000	0.88	1.01	0.99	0.89	0.9	0.91	0.96	0.94	0.95	0.97
chrII	84001	84250	0.92	0.97	1	0.95	0.92	0.91	0.94	0.94	0.93	0.92
chrII	84251	84500	0.9	0.98	0.99	1.02	0.91	0.9	0.98	0.94	0.91	0.92
chrII	84501	84750	0.91	1	0.97	0.94	0.9	0.9	0.9	0.97	0.96	0.94
chrII	84751	85000	0.91	0.95	0.97	0.94	0.94	0.9	0.93	0.97	0.98	0.97
chrII	85001	85250	0.93	0.97	1.02	0.93	0.94	0.93	0.92	0.95	0.94	0.97
chrII	85251	85500	1.01	1.01	1	0.93	0.92	0.95	0.9	0.94	0.97	0.97
chrII	85501	85750	0.98	0.99	1.01	0.9	0.91	0.96	0.92	0.92	0.96	0.95
chrII	85751	86000	0.99	1.01	0.99	0.9	0.91	0.94	0.89	0.94	0.96	0.97
chrII	86001	86250	1	0.97	1.01	0.92	0.9	0.95	0.92	0.97	0.95	0.95
chrII	86251	86500	0.91	0.98	1.06	0.9	0.89	0.96	0.95	0.96	0.92	0.95
chrII	86501	86750	0.92	0.96	1.04	0.92	0.89	0.95	0.98	0.95	0.93	0.93
chrII	86751	87000	0.94	0.95	1.03	0.99	0.9	0.95	0.96	0.91	0.93	0.94
chrII	87001	87250	0.95	0.94	1.06	1	0.92	0.93	0.94	0.93	0.95	0.95
chrII	87251	87500	0.98	0.96	1.05	0.94	0.93	0.93	0.91	0.93	0.93	0.94
chrII	87501	87750	0.94	1	1.05	0.89	0.93	0.94	0.95	0.95	0.92	0.97
chrII	87751	88000	0.92	0.96	1.01	0.89	0.89	0.91	0.94	0.97	0.92	0.94
chrII	88001	88250	0.91	0.99	0.94	0.94	0.88	0.95	0.96	0.94	0.94	0.95
chrII	88251	88500	0.86	1.02	0.94	1.01	0.94	0.93	1	0.96	0.88	0.91
chrII	88501	88750	0.94	0.97	1	0.96	0.91	0.93	0.92	0.95	0.94	0.92
chrII	88751	89000	0.93	0.94	1.05	0.98	0.88	0.94	0.94	0.93	0.94	0.94
chrII	89001	89250	0.95	0.96	1.03	1.04	0.92	0.99	0.98	0.94	0.94	0.95
chrII	89251	89500	0.97	0.97	0.97	0.99	0.93	0.97	1.02	0.94	0.94	0.9
chrII	89501	89750	0.95	0.95	0.95	0.98	0.92	0.96	0.98	0.96	0.92	0.92
chrII	89751	90000	1	0.96	0.98	0.96	0.92	0.98	0.94	0.97	0.93	0.92
chrII	90001	90250	0.93	0.95	0.98	0.9	0.93	0.99	0.99	0.95	0.98	0.94
chrII	90251	90500	0.95	0.98	0.97	0.89	0.9	0.97	1.07	0.97	0.93	0.91
chrII	90501	90750	0.99	0.97	0.93	0.97	0.92	1.03	1.05	0.97	0.96	0.93
chrII	90751	91000	0.96	0.99	0.9	0.94	0.92	1	1.06	0.96	0.97	0.97
chrII	91001	91250	0.95	1.03	0.93	0.95	0.9	0.94	1.04	0.97	0.92	1
chrII	91251	91500	0.97	1.05	1.01	0.99	0.95	0.96	1.08	0.99	0.91	0.95
chrII	91501	91750	0.99	1.05	1.02	0.98	0.92	0.99	1.12	0.97	0.93	0.94
chrII	91751	92000	0.96	1.06	1.02	0.96	0.91	1.01	1.11	0.94	0.95	0.93
chrII	92001	92250	0.92	1.1	0.94	1.01	0.91	1.02	1.19	0.95	0.92	0.92
chrII	92251	92500	0.94	1.21	0.97	0.97	0.9	0.98	1.14	0.99	0.95	0.95
chrII	92501	92750	0.98	1.19	1	1.01	0.91	1.01	1.13	0.95	1	0.97
chrII	92751	93000	0.96	1.26	0.98	0.98	0.93	1.02	1.13	0.94	0.99	0.95
chrII	93001	93250	0.95	1.22	1.05	0.92	0.94	1.05	1.12	0.91	0.96	0.94
chrII	93251	93500	0.94	1.25	1.09	0.94	0.92	1.05	1.15	0.93	0.94	0.91
chrII	93501	93750	0.95	1.29	1.01	1.05	0.94	1	1.16	0.94	0.96	0.9
chrII	93751	94000	1.01	1.28	1.04	1	0.94	1.01	1.12	0.95	0.96	0.95
chrII	94001	94250	0.98	1.27	1.05	0.97	0.92	1.02	1.15	0.96	0.95	0.98
chrII	94251	94500	0.94	1.21	1.04	0.98	0.91	1.01	1.15	0.98	0.93	0.95
chrII	94501	94750	0.96	1.12	1.03	1	0.89	0.99	1.1	0.92	0.93	0.9
chrII	94751	95000	0.95	1.16	1.04	0.99	0.89	0.97	1.09	0.94	0.94	0.93
chrII	95001	95250	0.92	1.14	1.05	1	0.88	1	1.06	0.96	0.95	0.93
chrII	95251	95500	1	1.07	1.01	1.02	0.91	1	1.08	0.97	0.92	0.93
chrII	95501	95750	1.01	1.01	1.01	1.05	0.91	1	1.07	0.97	0.92	0.92
chrII	95751	96000	0.96	1.04	0.98	0.97	0.91	1.02	1.08	0.96	0.96	0.93
chrII	96001	96250	0.94	0.99	0.97	1.01	0.96	1.02	1.09	0.94	0.95	0.92
chrII	96251	96500	0.9	0.98	0.9	1.05	0.95	1.04	1.11	0.92	0.91	0.92
chrII	96501	96750	0.99	0.98	0.97	1.07	0.92	1	1.05	0.92	0.9	0.93
chrII	96751	97000	0.96	0.98	1.06	0.94	0.92	0.94	0.98	0.95	0.92	0.96
chrII	97001	97250	0.99	0.96	1	0.99	0.95	0.97	1	0.93	0.93	0.92
chrII	97251	97500	0.99	0.93	0.96	0.99	0.97	0.96	1.05	0.93	0.96	0.92
chrII	97501	97750	1.01	0.93	0.98	0.92	0.94	0.97	0.97	0.92	0.99	0.89
chrII	97751	98000	0.99	0.93	1	0.95	0.95	1.01	0.96	0.91	0.94	0.93
chrII	98001	98250	0.94	0.94	1	1.07	0.92	1.03	0.94	0.96	0.95	0.93
chrII	98251	98500	0.99	0.97	0.96	0.96	0.92	1	0.97	0.93	0.96	0.98
chrII	98501	98750	0.97	0.99	1.03	0.96	0.95	0.99	0.96	0.91	0.91	0.96
chrII	98751	99000	0.95	0.98	1.05	0.96	0.93	1.01	0.96	0.91	0.94	1
chrII	99001	99250	0.93	0.96	1.05	0.95	0.94	0.94	0.95	0.96	1	0.98
chrII	99251	99500	0.97	0.94	1.03	0.97	0.94	0.96	0.91	0.94	0.97	0.96
chrII	99501	99750	1.02	0.98	1	0.95	0.9	0.95	0.91	0.96	0.92	0.95
chrII	99751	100000	1.01	1.02	0.97	0.92	0.91	0.91	0.9	0.97	0.94	0.96
chrII	100001	100250	0.97	0.97	0.93	0.92	0.93	0.94	0.9	0.96	0.91	0.94
chrII	100251	100500	0.96	0.95	0.89	0.98	0.97	0.96	0.91	0.96	0.93	0.93
chrII	100501	100750	0.95	0.98	1.02	0.97	0.94	0.96	0.93	0.95	0.94	0.93
chrII	100751	101000	0.95	0.98	1.02	0.96	0.92	0.93	0.94	0.99	0.92	0.97
chrII	101001	101250	0.94	0.93	1.03	0.99	0.95	0.92	0.95	0.99	0.94	0.95
chrII	101251	101500	0.94	0.98	0.92	0.96	0.92	0.95	0.96	0.99	0.95	0.95
chrII	101501	101750	0.93	0.97	0.96	0.97	0.94	0.94	0.93	0.96	0.98	0.93
chrII	101751	102000	0.98	0.97	1	0.89	0.95	0.95	0.94	0.96	0.99	0.98
chrII	102001	102250	0.93	0.98	1	0.96	0.96	0.93	0.92	0.91	0.98	0.99
chrII	102251	102500	0.96	1	0.93	0.95	0.96	0.95	0.93	0.95	0.96	0.98
chrII	102501	102750	0.97	1.01	1.06	0.98	0.96	0.93	0.97	0.94	0.96	0.96
chrII	102751	103000	0.96	0.99	1.04	0.95	0.98	0.95	0.97	0.91	0.98	0.95
chrII	103001	103250	0.95	1.05	1.01	1.01	0.95	1	0.96	0.95	0.96	0.91
chrII	103251	103500	0.94	1.08	1	1.04	0.93	1.06	0.99	0.95	0.91	0.9
chrII	103501	103750	0.84	1.01	1.03	1.01	0.92	1.04	0.94	0.93	0.95	0.91
chrII	103751	104000	0.91	0.98	1.06	0.99	0.95	0.97	0.98	0.94	0.94	0.93
chrII	104001	104250	0.99	0.97	1.01	0.98	0.97	0.93	0.97	0.92	0.91	0.93
chrII	104251	104500	0.99	0.95	1.02	0.96	0.93	0.94	0.93	0.94	0.92	0.93
chrII	104501	104750	0.94	0.95	0.93	1.05	0.94	1	0.97	0.92	0.93	0.88
chrII	104751	105000	0.91	0.98	0.99	1.02	0.94	0.98	0.94	0.96	0.98	0.91
chrII	105001	105250	0.9	1.02	0.97	0.96	0.94	0.99	0.96	1.01	0.94	0.93
chrII	105251	105500	0.96	1.06	0.96	1.02	0.95	0.98	0.93	1	0.93	0.96
chrII	105501	105750	0.92	0.97	0.99	1.03	0.91	0.93	0.96	0.95	0.98	0.98
chrII	105751	106000	0.96	1.02	1.02	0.96	0.91	0.9	0.94	0.94	0.96	0.97
chrII	106001	106250	0.96	1.02	0.94	0.99	0.93	0.9	0.9	0.95	0.97	0.92
chrII	106251	106500	0.95	1.02	0.97	1	0.99	0.88	0.94	0.93	0.95	0.94
chrII	106501	106750	0.99	1.03	1.04	0.99	0.97	0.96	0.93	0.96	0.94	0.91
chrII	106751	107000	0.98	0.99	1.01	1	0.96	0.94	0.96	0.95	0.97	0.88
chrII	107001	107250	0.97	0.96	0.97	1.03	0.95	0.94	0.93	0.98	0.97	0.92
chrII	107251	107500	0.98	0.96	0.99	1.02	0.92	0.94	0.95	0.98	0.98	0.93
chrII	107501	107750	0.95	0.95	0.99	1	0.92	0.99	0.95	0.95	0.95	0.93
chrII	107751	108000	0.89	0.95	1.02	0.98	0.94	0.96	0.98	0.94	0.93	0.97
chrII	108001	108250	0.9	1.02	1.02	0.97	0.94	0.94	0.97	0.93	0.9	0.94
chrII	108251	108500	0.93	1	0.98	0.98	0.95	0.93	0.98	0.95	0.88	0.94
chrII	108501	108750	0.93	1.04	0.93	1.04	0.94	0.98	0.95	0.96	0.93	0.95
chrII	108751	109000	0.97	1.05	0.99	0.98	0.95	1	0.96	0.95	0.98	0.96
chrII	109001	109250	0.93	1	1.04	1	0.95	0.93	0.96	0.98	0.96	0.94
chrII	109251	109500	0.95	0.95	1.06	1	0.95	0.94	0.97	0.96	0.94	0.95
chrII	109501	109750	0.97	1	1.03	0.96	0.93	0.92	0.95	0.95	0.93	0.96
chrII	109751	110000	0.95	0.98	0.96	0.99	0.93	0.97	0.96	0.92	0.93	0.92
chrII	110001	110250	0.93	1	0.97	1.01	0.93	0.95	0.98	0.93	0.92	0.94
chrII	110251	110500	1	1.01	0.94	1	0.95	0.94	0.98	0.95	0.96	0.94
chrII	110501	110750	0.96	1.02	1	0.96	0.94	0.99	0.92	0.95	0.98	0.93
chrII	110751	111000	0.96	1	0.92	0.99	0.92	0.96	0.94	0.97	0.98	0.94
chrII	111001	111250	0.96	0.97	0.96	0.97	0.94	0.95	0.96	1	0.95	0.95
chrII	111251	111500	0.99	0.98	1.02	1.03	0.92	0.99	0.98	0.98	0.97	0.92
chrII	111501	111750	0.98	1	1.01	0.98	0.91	0.91	0.91	0.97	0.94	1
chrII	111751	112000	0.99	0.99	0.98	0.95	0.91	0.95	0.88	0.95	0.95	0.98
chrII	112001	112250	0.99	1	0.96	0.99	0.92	0.91	0.91	0.98	0.95	0.96
chrII	112251	112500	0.94	1	1	0.97	0.92	0.94	0.96	0.97	0.91	0.98
chrII	112501	112750	0.95	1.02	1.06	0.95	0.92	0.99	0.95	0.99	0.91	0.96
chrII	112751	113000	0.97	0.97	1.05	0.97	0.94	0.95	0.97	0.98	0.91	0.93
chrII	113001	113250	0.98	1.01	1.08	0.97	0.93	0.9	0.94	0.94	0.95	0.96
chrII	113251	113500	0.98	0.98	1.01	1.06	0.96	0.95	0.91	0.97	0.98	0.97
chrII	113501	113750	0.94	1	0.97	1.01	0.94	0.9	0.94	0.95	0.96	0.95
chrII	113751	114000	0.97	1.01	1	0.99	0.96	0.91	0.92	0.94	0.96	0.93
chrII	114001	114250	0.99	1.01	1.02	1.01	0.96	0.95	0.96	0.93	0.98	0.92
chrII	114251	114500	0.99	1.06	1.01	1.03	0.93	0.95	0.96	0.98	0.96	0.92
chrII	114501	114750	0.95	1.03	1.01	0.98	0.93	0.94	0.94	0.96	0.98	0.94
chrII	114751	115000	0.95	1.04	1	0.98	0.9	0.91	0.94	0.97	0.94	0.93
chrII	115001	115250	0.92	1.01	0.98	1.04	0.92	0.94	0.95	0.95	0.99	0.98
chrII	115251	115500	0.95	0.95	0.92	1.05	0.96	1	1	0.93	0.92	0.95
chrII	115501	115750	0.98	1.02	1	1.02	0.96	0.97	0.96	0.92	0.96	0.96
chrII	115751	116000	0.96	1.01	1.02	0.99	0.95	0.93	0.92	0.92	0.94	0.96
chrII	116001	116250	0.95	1.01	0.98	1.04	0.96	0.93	0.92	0.95	0.97	0.99
chrII	116251	116500	0.97	1.03	1	0.97	0.92	0.92	0.9	0.99	0.97	1
chrII	116501	116750	0.98	1.03	1.01	0.97	0.97	0.92	0.91	0.97	0.97	0.95
chrII	116751	117000	1.03	1.03	0.98	0.97	0.97	0.93	0.91	0.99	0.96	0.98
chrII	117001	117250	1.03	0.99	0.97	0.97	0.94	0.94	0.88	0.99	0.95	0.97
chrII	117251	117500	1	0.97	1.01	0.93	0.93	0.92	0.9	1	1	0.98
chrII	117501	117750	0.99	0.98	1.04	0.88	0.93	0.9	0.91	0.98	1.05	1.01
chrII	117751	118000	0.97	1.02	1.02	0.98	0.94	0.9	0.93	0.99	0.98	0.97
chrII	118001	118250	0.99	1.05	0.99	0.99	0.93	0.92	0.94	0.94	0.92	0.99
chrII	118251	118500	1	1.05	0.97	1.01	0.95	0.95	1	0.92	0.94	0.93
chrII	118501	118750	0.99	1.02	0.95	0.97	0.97	0.91	0.95	0.92	0.97	0.95
chrII	118751	119000	0.95	1	0.98	0.99	0.94	0.94	0.97	0.95	0.99	0.95
chrII	119001	119250	0.89	1.02	0.92	0.98	0.91	0.95	0.95	0.93	0.95	0.96
chrII	119251	119500	0.87	1.02	0.91	0.96	0.93	1	1.01	0.9	0.92	0.89
chrII	119501	119750	0.94	0.96	0.94	0.89	0.98	0.95	0.99	0.91	0.95	0.9
chrII	119751	120000	0.94	0.94	0.98	0.97	0.98	0.93	0.93	0.91	0.93	0.9
chrII	120001	120250	0.95	0.93	0.98	0.98	0.97	0.97	0.94	0.93	0.89	0.92
chrII	120251	120500	1.02	0.94	0.97	1.01	0.96	0.99	0.95	0.99	0.92	0.95
chrII	120501	120750	1.03	0.97	1.01	1.03	0.94	0.94	0.98	0.97	0.93	0.93
chrII	120751	121000	0.94	0.99	0.99	1.04	0.92	0.95	0.97	0.92	0.97	0.94
chrII	121001	121250	0.91	1.03	0.95	1.01	0.93	1	1.01	0.96	0.93	0.94
chrII	121251	121500	0.95	0.98	0.92	0.96	0.94	1.02	1	0.97	0.93	0.93
chrII	121501	121750	0.95	1.02	0.97	1.07	0.95	0.97	1.02	0.94	0.91	0.9
chrII	121751	122000	0.91	1.02	0.94	0.97	0.96	0.93	0.99	0.96	0.92	0.91
chrII	122001	122250	0.88	1.05	1	0.94	0.98	0.99	0.98	0.96	0.93	0.95
chrII	122251	122500	0.88	1.04	0.95	0.95	0.97	1.01	1.01	0.92	0.9	0.9
chrII	122501	122750	0.83	1.02	0.98	1.07	0.97	1.02	1.07	0.93	0.92	0.87
chrII	122751	123000	0.91	1.01	0.94	0.95	0.94	0.96	0.99	0.97	0.91	0.92
chrII	123001	123250	0.95	0.97	0.99	0.95	0.88	0.95	0.91	0.96	0.9	0.97
chrII	123251	123500	0.96	0.98	0.97	0.96	0.92	0.94	0.93	0.99	0.9	0.93
chrII	123501	123750	1.01	1	1	1.04	0.94	0.93	0.96	0.97	0.96	0.94
chrII	123751	124000	0.98	1.01	0.96	1.04	0.94	0.94	0.97	0.92	0.93	0.95
chrII	124001	124250	0.98	1.04	1.02	1.04	0.96	0.99	0.92	0.95	0.9	0.93
chrII	124251	124500	0.96	1	1	0.98	0.98	0.93	0.92	0.97	0.91	0.94
chrII	124501	124750	0.96	1	0.96	0.95	0.95	0.92	0.98	0.95	0.93	0.98
chrII	124751	125000	0.95	1.02	1.03	0.95	0.93	0.92	0.97	0.97	0.97	0.98
chrII	125001	125250	1	1	0.97	0.95	0.95	0.93	0.91	0.94	0.95	0.95
chrII	125251	125500	0.97	1	0.96	0.9	0.92	0.93	0.91	0.93	0.99	1.01
chrII	125501	125750	0.94	1.03	0.99	0.97	0.94	0.91	0.95	0.98	0.92	0.96
chrII	125751	126000	0.92	1.02	0.96	1.01	0.92	0.89	0.97	0.96	0.93	0.97
chrII	126001	126250	0.97	1	0.96	1.09	0.95	0.95	0.99	0.94	0.95	0.94
chrII	126251	126500	0.98	1.02	1.02	0.95	0.93	0.94	0.94	1.01	0.94	0.95
chrII	126501	126750	0.96	0.96	0.97	0.93	0.96	0.94	0.95	0.96	0.95	0.91
chrII	126751	127000	0.93	1	0.97	0.96	0.96	0.95	0.95	0.97	0.95	0.93
chrII	127001	127250	0.9	0.99	0.99	0.96	0.93	0.94	0.96	0.96	0.92	0.95
chrII	127251	127500	0.91	0.98	0.95	0.96	0.93	1	0.98	0.96	0.92	0.94
chrII	127501	127750	1.03	1.02	0.89	0.97	0.97	0.99	0.99	0.94	0.92	0.9
chrII	127751	128000	0.99	1.01	0.93	1.01	0.98	0.97	0.93	0.92	0.95	0.95
chrII	128001	128250	0.97	1	1.01	0.94	0.94	0.9	0.91	0.98	0.96	1
chrII	128251	128500	1	1.04	1.05	0.87	0.92	0.91	0.93	0.97	0.97	0.99
chrII	128501	128750	1	1.03	0.97	0.87	0.93	0.9	0.94	0.97	0.93	0.98
chrII	128751	129000	0.98	1.06	1	0.94	0.95	0.9	0.88	0.96	0.91	0.94
chrII	129001	129250	0.98	0.99	1.11	0.98	0.93	0.94	0.9	0.95	0.93	0.93
chrII	129251	129500	0.99	0.99	1.06	0.94	0.93	0.91	0.92	0.93	0.94	0.95
chrII	129501	129750	1.01	1	0.98	0.97	0.91	0.91	0.92	0.96	0.97	0.96
chrII	129751	130000	1.02	0.96	0.97	0.98	0.93	0.95	0.9	0.99	0.95	0.95
chrII	130001	130250	1.02	1.01	1	1.01	0.93	0.95	0.93	0.97	0.96	0.94
chrII	130251	130500	0.95	1	1.03	0.98	0.9	0.92	0.94	0.94	0.97	0.97
chrII	130501	130750	0.95	0.95	0.95	1.01	0.93	0.93	0.95	0.96	0.98	0.95
chrII	130751	131000	0.95	0.98	0.95	0.97	0.9	0.91	0.91	0.98	0.94	0.96
chrII	131001	131250	0.95	1.01	0.99	0.97	0.93	0.91	0.94	0.93	0.92	0.96
chrII	131251	131500	1.02	1.01	1.03	0.95	0.92	0.92	0.92	0.99	0.95	0.99
chrII	131501	131750	0.97	1.03	1	0.97	0.96	0.89	0.9	0.99	0.98	0.99
chrII	131751	132000	0.96	1	1.03	0.96	0.92	0.91	0.94	0.95	0.99	0.97
chrII	132001	132250	0.95	0.99	1.08	1.03	0.93	0.94	0.97	0.98	0.98	0.92
chrII	132251	132500	0.98	1	1.04	1.03	0.98	0.98	0.97	0.97	0.95	0.88
chrII	132501	132750	0.98	1	0.96	0.98	0.99	0.96	0.97	0.93	0.97	0.94
chrII	132751	133000	1.01	0.99	0.98	0.97	0.96	0.96	0.97	0.89	0.91	0.97
chrII	133001	133250	0.97	1.01	0.98	0.98	0.96	0.95	0.95	0.94	0.9	0.94
chrII	133251	133500	0.93	1.04	0.99	0.99	0.91	0.92	0.91	0.96	0.93	0.92
chrII	133501	133750	0.91	1.02	0.95	0.96	0.9	0.91	0.94	0.95	0.94	0.93
chrII	133751	134000	0.88	1.03	0.92	1.17	0.95	0.97	1.11	0.95	0.92	0.89
chrII	134001	134250	0.96	1.01	0.93	1.08	0.93	0.96	1	0.98	0.91	0.9
chrII	134251	134500	1	1.03	0.98	1	0.92	0.91	0.9	0.96	0.97	0.93
chrII	134501	134750	1	1.03	1.02	1	0.95	0.93	0.93	0.98	0.95	0.94
chrII	134751	135000	1.02	1.03	1.05	0.99	0.95	0.93	0.91	0.94	0.96	0.96
chrII	135001	135250	0.98	0.98	0.97	0.98	0.94	0.93	0.95	0.95	0.99	0.96
chrII	135251	135500	0.97	0.94	0.99	0.92	0.94	0.89	0.91	1	0.95	0.98
chrII	135501	135750	1	0.98	1.02	0.98	0.95	0.91	0.95	0.96	0.93	0.95
chrII	135751	136000	1.01	1.02	0.98	0.96	0.91	0.9	0.96	0.99	0.97	0.96
chrII	136001	136250	0.99	1.03	0.98	0.93	0.91	0.9	0.93	0.99	1	0.96
chrII	136251	136500	0.93	1.02	0.94	1.01	0.94	0.93	0.94	1.02	0.95	0.95
chrII	136501	136750	0.9	0.95	1.01	1.04	0.97	1.01	0.92	1	0.92	0.98
chrII	136751	137000	0.97	0.99	1	0.98	0.96	0.98	0.89	0.96	0.94	0.96
chrII	137001	137250	0.99	1.01	1.04	1.01	0.95	0.97	0.92	0.94	0.94	0.97
chrII	137251	137500	0.98	1.09	1.04	0.99	0.95	0.94	0.93	0.95	0.97	0.89
chrII	137501	137750	0.92	1.08	1.44	0.98	0.94	1	1.03	0.95	0.94	0.82
chrII	137751	138000	0.94	1.03	0.98	0.99	0.94	0.95	0.98	0.96	0.93	0.93
chrII	138001	138250	0.97	0.97	0.99	1.03	0.95	0.97	1.01	0.97	0.94	0.94
chrII	138251	138500	0.95	0.98	0.99	1.02	0.96	0.99	0.94	0.95	0.95	0.95
chrII	138501	138750	0.98	0.96	0.94	0.99	0.98	0.95	0.98	0.94	0.93	1
chrII	138751	139000	1.01	0.99	0.97	0.98	0.97	0.94	0.96	0.95	0.99	0.98
chrII	139001	139250	0.98	1.04	1	0.95	0.95	0.94	0.89	0.96	0.98	0.99
chrII	139251	139500	0.95	1.01	1.04	0.99	0.96	0.94	0.87	0.97	0.97	1
chrII	139501	139750	1.01	1.02	1.08	0.98	0.95	0.94	0.92	0.99	0.98	0.96
chrII	139751	140000	0.99	0.94	1.05	0.94	0.93	0.95	0.91	0.98	0.97	0.97
chrII	140001	140250	0.96	0.94	1	1.01	0.93	0.99	0.97	0.96	0.97	0.97
chrII	140251	140500	0.96	0.97	0.98	1.01	0.93	1	1.03	0.96	0.98	0.96
chrII	140501	140750	1	0.94	0.95	0.97	0.92	0.97	1	0.98	0.93	0.97
chrII	140751	141000	1.04	0.94	0.97	1.07	0.95	0.99	1.05	1.01	0.93	0.98
chrII	141001	141250	0.98	0.97	1.07	1.03	0.94	0.98	1.07	0.98	0.95	0.97
chrII	141251	141500	1	1.04	1.06	0.96	0.92	0.94	1.08	0.97	0.95	0.95
chrII	141501	141750	0.92	1.02	1.02	0.96	0.92	0.95	1.12	0.99	0.94	0.96
chrII	141751	142000	0.9	1.01	0.92	1	0.95	0.98	1.13	0.94	0.94	0.95
chrII	142001	142250	0.98	1.1	1	1.09	0.95	1.03	1.13	0.93	0.92	0.91
chrII	142251	142500	1.03	1.14	1.06	1.03	0.93	1.04	1.07	0.91	0.91	0.95
chrII	142501	142750	0.99	1.16	1.05	1.04	0.96	1.05	1.13	0.94	0.96	0.9
chrII	142751	143000	1.02	1.17	1.05	0.99	0.96	1.02	1.14	0.95	0.96	0.93
chrII	143001	143250	0.96	1.22	1.03	1.04	0.95	1	1.12	0.92	0.94	0.96
chrII	143251	143500	0.93	1.2	1.01	1.06	0.94	1.01	1.19	0.95	0.95	0.95
chrII	143501	143750	0.98	1.22	0.96	1.01	0.94	1.06	1.25	0.91	0.95	0.9
chrII	143751	144000	0.96	1.22	0.85	1.07	0.96	1.08	1.22	0.94	0.91	0.92
chrII	144001	144250	0.98	1.24	0.96	1.02	0.96	1.05	1.08	0.92	0.93	0.96
chrII	144251	144500	0.96	1.23	1.03	0.99	0.95	0.99	1.05	0.96	0.95	0.94
chrII	144501	144750	0.99	1.11	0.99	0.97	0.93	1.02	1.08	0.96	0.94	0.92
chrII	144751	145000	0.97	1.13	0.98	1.02	0.92	1.01	1.1	0.95	0.92	0.97
chrII	145001	145250	0.97	1.05	1.09	1.04	0.92	0.96	1.09	0.95	0.96	1
chrII	145251	145500	0.98	1.07	1.06	0.97	0.94	0.97	1.1	0.95	1.01	0.96
chrII	145501	145750	0.97	1.01	1.08	0.93	0.95	1.02	1.08	1	0.94	0.94
chrII	145751	146000	0.99	0.96	1.46	0.98	0.94	1.1	1.16	0.92	0.96	0.88
chrII	146001	146250	0.93	1.03	1.02	0.98	0.96	1.02	1.06	0.92	0.93	0.9
chrII	146251	146500	0.98	0.97	1	0.93	0.94	0.98	1.02	0.94	0.92	0.95
chrII	146501	146750	1.02	0.97	1	1.01	0.95	0.94	0.99	0.93	0.93	0.94
chrII	146751	147000	0.99	0.91	0.98	1	0.92	0.94	0.98	0.96	0.97	0.96
chrII	147001	147250	0.99	0.89	1.04	1	0.92	0.96	0.97	0.94	0.98	0.96
chrII	147251	147500	0.98	0.93	0.98	1.03	0.92	0.94	0.98	0.96	0.98	0.91
chrII	147501	147750	0.96	0.99	0.97	1.05	0.93	0.99	0.97	0.94	0.95	0.93
chrII	147751	148000	1	1.01	0.98	1.02	0.95	1	0.94	0.93	0.98	0.94
chrII	148001	148250	0.96	0.99	0.99	0.99	0.95	1	0.94	0.95	0.99	0.93
chrII	148251	148500	0.97	1.01	0.95	1.02	0.95	0.96	0.93	0.95	0.94	0.93
chrII	148501	148750	1.01	1.05	1.02	1.06	0.96	0.98	0.96	0.96	0.97	0.93
chrII	148751	149000	1.04	0.96	0.98	1.01	0.92	0.98	0.99	0.94	0.97	0.94
chrII	149001	149250	1.03	0.93	0.97	1.01	0.91	0.96	0.91	0.94	0.93	0.95
chrII	149251	149500	1	0.94	0.93	0.96	0.93	0.95	0.92	0.97	0.95	0.95
chrII	149501	149750	0.98	0.93	0.97	1.02	0.93	0.97	0.94	1	0.98	0.95
chrII	149751	150000	1	0.91	1.06	1	0.94	0.96	0.91	0.99	0.94	0.96
chrII	150001	150250	0.99	0.94	1.02	1	0.97	0.96	0.97	0.99	0.93	0.96
chrII	150251	150500	0.91	0.95	1	1.02	0.96	0.97	0.97	0.98	0.94	0.92
chrII	150501	150750	0.94	0.96	1.04	0.97	0.92	0.99	0.95	0.96	0.93	0.94
chrII	150751	151000	1.03	0.94	1.05	0.91	0.93	0.99	0.97	0.93	0.92	0.95
chrII	151001	151250	1.03	0.99	1	0.96	0.94	0.99	0.98	0.96	0.96	0.92
chrII	151251	151500	0.95	0.96	0.99	1.01	0.97	0.99	0.98	0.96	0.95	0.86
chrII	151501	151750	0.94	0.96	0.98	0.96	0.97	0.94	0.94	0.96	0.97	0.89
chrII	151751	152000	1	0.97	0.97	0.92	0.95	1	0.95	0.94	0.96	0.95
chrII	152001	152250	0.92	0.95	0.98	0.97	0.96	0.94	0.92	0.93	0.96	0.94
chrII	152251	152500	0.91	0.98	1	0.98	0.94	0.93	0.89	0.96	0.93	1
chrII	152501	152750	0.95	0.98	1.01	0.98	0.92	0.89	0.89	0.93	0.94	0.98
chrII	152751	153000	0.98	0.93	1.03	1.06	0.93	0.93	0.92	0.95	0.95	0.95
chrII	153001	153250	1.01	0.9	1	0.98	0.94	0.96	0.93	0.94	0.93	0.95
chrII	153251	153500	1.01	0.95	1.01	1	0.94	0.98	0.92	0.93	0.91	0.96
chrII	153501	153750	0.96	0.92	0.9	1.02	0.95	0.95	0.99	0.96	0.91	0.94
chrII	153751	154000	0.95	0.91	0.94	0.96	0.97	0.92	0.98	0.96	0.89	0.95
chrII	154001	154250	0.98	0.91	0.99	0.95	0.92	0.92	0.95	0.95	0.96	0.95
chrII	154251	154500	1.02	0.96	1.05	0.97	0.95	0.95	0.93	0.94	0.93	0.96
chrII	154501	154750	1.06	1	1.06	0.98	0.94	1	0.9	0.94	0.91	0.93
chrII	154751	155000	1.08	1.04	1	1.01	0.94	0.98	0.93	0.95	0.92	0.93
chrII	155001	155250	1.04	0.99	0.97	1.01	0.93	0.98	0.98	0.98	0.91	0.93
chrII	155251	155500	0.98	0.98	0.95	1.05	0.94	1	0.94	0.97	0.9	0.91
chrII	155501	155750	0.91	1.01	0.92	1.07	0.97	0.99	1	0.98	0.92	0.9
chrII	155751	156000	0.91	1.04	0.93	1.08	0.96	1	0.99	0.91	0.92	0.93
chrII	156001	156250	0.96	0.96	0.94	1.08	0.91	0.97	0.97	0.91	0.92	0.92
chrII	156251	156500	0.94	0.93	0.92	1.01	0.92	0.93	0.94	0.96	0.96	0.97
chrII	156501	156750	0.92	0.94	0.92	0.97	0.93	0.93	0.94	0.95	0.92	0.96
chrII	156751	157000	0.94	0.99	0.94	1.01	0.94	0.95	0.99	0.95	0.93	0.96
chrII	157001	157250	0.95	0.96	0.96	1.03	0.93	0.97	0.94	0.97	0.89	0.94
chrII	157251	157500	0.97	0.94	1.04	0.96	0.91	0.95	0.91	0.98	0.9	0.97
chrII	157501	157750	1	0.94	1.04	1.06	0.9	0.97	0.93	0.97	0.94	0.94
chrII	157751	158000	0.98	0.95	0.96	1.01	0.9	0.98	0.95	0.95	0.91	0.95
chrII	158001	158250	0.95	0.95	0.96	0.96	0.91	0.93	0.92	0.94	0.92	1.01
chrII	158251	158500	0.96	0.95	1	1.01	0.92	0.92	0.98	0.96	0.91	0.99
chrII	158501	158750	0.99	0.94	0.96	0.98	0.93	0.95	0.96	0.98	0.95	0.96
chrII	158751	159000	1	0.99	0.96	0.94	0.93	0.93	0.91	0.94	0.96	0.97
chrII	159001	159250	1	0.98	0.99	0.95	0.92	0.9	0.91	0.93	0.95	0.97
chrII	159251	159500	0.94	1.01	0.98	0.95	0.94	0.91	0.91	0.98	0.99	0.96
chrII	159501	159750	0.93	0.99	1	0.96	0.93	0.94	0.96	0.96	0.99	0.94
chrII	159751	160000	0.94	0.98	1	1.01	0.91	0.93	0.96	0.94	0.97	0.93
chrII	160001	160250	0.95	1.01	0.95	0.99	0.87	0.87	0.94	0.97	0.96	0.94
chrII	160251	160500	1.01	0.98	0.93	0.94	0.88	0.89	0.87	0.97	0.93	1
chrII	160501	160750	1	0.98	1.04	0.96	0.91	0.89	0.89	0.95	0.97	1.02
chrII	160751	161000	1.03	0.96	1.01	0.97	0.89	0.92	0.9	0.94	0.97	1.02
chrII	161001	161250	0.97	0.92	0.99	1.01	0.92	0.93	0.95	0.96	0.93	0.99
chrII	161251	161500	0.88	0.91	0.93	1.01	0.93	0.97	1	0.97	0.95	0.97
chrII	161501	161750	0.92	0.87	0.97	1.07	0.92	1	1	0.94	0.98	0.89
chrII	161751	162000	0.97	0.95	0.94	1.01	0.91	0.92	0.93	0.98	0.92	0.91
chrII	162001	162250	0.99	0.98	0.96	0.97	0.94	0.94	0.96	0.97	0.92	0.9
chrII	162251	162500	0.94	0.92	0.95	0.99	0.91	0.92	0.94	0.94	0.96	0.93
chrII	162501	162750	0.97	0.9	0.93	1.01	0.92	0.92	0.92	0.93	0.96	0.94
chrII	162751	163000	0.88	0.93	1.02	0.99	0.94	0.97	0.98	0.94	0.96	0.9
chrII	163001	163250	0.94	0.97	0.98	0.96	0.91	0.92	0.89	0.96	0.97	0.91
chrII	163251	163500	0.92	0.98	1	0.98	0.9	0.9	0.9	0.96	0.95	0.97
chrII	163501	163750	0.95	0.94	0.96	0.97	0.93	0.91	0.9	0.94	0.93	0.98
chrII	163751	164000	0.93	0.95	0.93	0.98	0.91	0.92	0.92	0.98	0.94	0.94
chrII	164001	164250	0.94	0.94	0.91	1	0.94	0.93	0.96	0.98	0.95	0.93
chrII	164251	164500	0.95	0.96	0.93	1.02	0.94	0.91	0.96	0.95	1	0.88
chrII	164501	164750	0.98	0.93	0.98	0.95	0.93	0.92	0.91	0.94	0.94	0.91
chrII	164751	165000	0.97	0.95	0.98	0.95	0.92	0.94	0.99	0.95	0.95	0.94
chrII	165001	165250	0.93	0.94	1	0.96	0.91	0.95	0.9	0.99	0.94	0.95
chrII	165251	165500	0.9	0.94	0.99	0.96	0.9	0.93	0.92	0.99	0.93	0.95
chrII	165501	165750	0.94	0.93	0.96	1.02	0.92	0.96	0.95	0.94	0.93	0.97
chrII	165751	166000	0.9	0.95	0.95	1.02	0.92	0.97	1.05	0.92	0.92	0.95
chrII	166001	166250	0.87	1	1.04	0.96	0.93	0.98	1.09	0.96	0.9	0.93
chrII	166251	166500	0.87	0.95	0.98	0.98	0.94	0.99	1.08	0.94	0.87	0.87
chrII	166501	166750	0.93	1	0.97	0.97	0.94	0.98	1.02	0.94	0.91	0.93
chrII	166751	167000	0.98	0.99	0.92	0.94	0.94	0.98	0.99	0.99	0.93	0.99
chrII	167001	167250	0.92	0.96	0.91	1.07	0.93	0.96	0.96	0.95	0.95	0.93
chrII	167251	167500	0.86	0.97	0.91	1.07	0.91	1.02	1.04	0.92	0.93	0.92
chrII	167501	167750	0.97	0.96	0.95	0.98	0.94	0.92	1.09	0.95	0.96	0.91
chrII	167751	168000	0.98	1.01	0.96	0.96	0.94	0.95	1.09	0.96	0.93	0.92
chrII	168001	168250	0.94	1.09	0.94	0.92	0.93	0.94	1.06	1	0.94	0.96
chrII	168251	168500	0.93	1.09	0.96	1.03	0.92	0.95	1.09	1	0.92	0.92
chrII	168501	168750	0.98	1.14	1	1.05	0.92	0.98	1.11	1	0.95	0.93
chrII	168751	169000	0.94	1.25	1	1.01	0.89	0.98	1.09	0.96	0.96	0.94
chrII	169001	169250	0.96	1.29	1.01	0.94	0.9	0.95	1.05	0.92	0.97	0.96
chrII	169251	169500	0.98	1.31	0.99	0.98	0.9	0.99	1.17	0.96	0.9	0.98
chrII	169501	169750	0.94	1.31	0.95	0.98	0.92	1.01	1.18	0.93	0.88	0.95
chrII	169751	170000	0.95	1.3	1.08	0.94	0.89	0.99	1.12	0.92	0.93	0.96
chrII	170001	170250	0.95	1.32	1.05	1.01	0.9	1.02	1.17	0.92	0.93	0.93
chrII	170251	170500	0.97	1.32	1.05	0.98	0.9	1.04	1.1	0.93	0.9	0.93
chrII	170501	170750	1.01	1.38	0.97	0.97	0.92	1.05	1.14	0.95	0.91	0.95
chrII	170751	171000	1.01	1.32	0.9	1.02	0.91	1.08	1.15	0.94	0.95	0.88
chrII	171001	171250	1	1.26	0.95	1	0.9	1.09	1.13	0.93	0.94	0.9
chrII	171251	171500	0.99	1.13	0.96	1.03	0.91	1.07	1.09	0.96	0.95	0.92
chrII	171501	171750	0.97	1.09	0.95	1.01	0.92	0.96	1.1	0.95	0.96	0.98
chrII	171751	172000	0.95	1.06	0.9	0.98	0.91	0.98	1.06	0.95	0.97	0.94
chrII	172001	172250	0.95	1.03	0.95	1.01	0.9	0.97	1.04	0.97	0.96	0.97
chrII	172251	172500	0.92	1.02	0.93	1.03	0.92	1.02	1.06	0.91	0.94	0.94
chrII	172501	172750	0.95	0.97	0.97	1	0.92	1.03	1.03	0.92	0.92	0.96
chrII	172751	173000	0.96	0.95	0.99	0.94	0.94	0.99	1.01	0.96	0.96	0.93
chrII	173001	173250	0.95	0.93	0.99	0.94	0.92	0.95	0.93	0.98	0.91	0.95
chrII	173251	173500	0.96	0.95	1	0.94	0.91	0.96	0.97	0.95	0.93	0.98
chrII	173501	173750	0.98	0.94	1.03	0.96	0.89	0.98	0.98	0.95	0.92	0.98
chrII	173751	174000	0.92	0.95	0.99	0.98	0.9	0.94	1	0.96	0.98	0.97
chrII	174001	174250	0.96	0.95	0.99	0.99	0.93	0.95	0.98	0.93	0.95	0.97
chrII	174251	174500	0.92	0.88	0.98	1	0.91	0.98	0.98	0.92	0.95	0.94
chrII	174501	174750	0.87	0.87	0.95	0.99	0.94	1.01	1.05	0.96	0.95	0.88
chrII	174751	175000	0.89	0.88	0.87	1.02	0.95	1	1.05	0.92	0.99	0.89
chrII	175001	175250	0.94	0.94	1.01	0.99	0.92	1	1.04	0.95	0.9	0.89
chrII	175251	175500	0.94	0.99	0.99	1.04	0.91	0.96	1.03	0.97	0.9	0.92
chrII	175501	175750	0.93	0.96	1.04	1.04	0.91	0.93	0.99	0.91	0.9	0.96
chrII	175751	176000	0.97	1	0.98	1.01	0.9	0.95	1.02	0.94	0.92	0.93
chrII	176001	176250	0.97	0.98	1.07	0.98	0.9	0.97	1.03	0.98	0.96	0.92
chrII	176251	176500	0.92	1.09	0.99	1	0.91	0.95	1.02	0.95	0.93	0.95
chrII	176501	176750	1	1.08	0.98	0.99	0.92	0.96	1.03	0.98	0.94	0.95
chrII	176751	177000	0.98	1.06	1	1.06	0.91	0.97	1.07	0.96	0.93	0.97
chrII	177001	177250	0.95	1.09	0.99	1.01	0.9	0.98	1.08	0.97	0.94	0.99
chrII	177251	177500	0.93	1.09	1.01	1.04	0.9	0.96	1.08	0.94	0.93	0.96
chrII	177501	177750	0.9	1.1	0.97	1.02	0.91	1	1.13	0.95	0.9	0.92
chrII	177751	178000	0.88	1.09	0.94	1.06	0.93	0.96	1.15	0.95	0.9	0.91
chrII	178001	178250	0.96	1.09	0.98	0.99	0.9	0.93	1.09	0.94	0.89	0.94
chrII	178251	178500	1.01	1.08	0.99	0.96	0.89	0.91	1.02	0.94	0.96	0.97
chrII	178501	178750	1.01	1.06	0.96	1	0.89	0.9	1.02	0.93	0.99	0.96
chrII	178751	179000	1.01	1.06	1	1.06	0.89	0.96	1.03	0.93	0.95	0.98
chrII	179001	179250	0.95	1.05	1.01	1	0.9	0.95	1	0.96	0.95	0.97
chrII	179251	179500	0.92	0.99	1	1	0.92	0.93	1.04	0.97	0.91	0.95
chrII	179501	179750	0.98	1	0.96	1.06	0.91	0.97	1.04	0.92	0.91	0.95
chrII	179751	180000	0.99	0.97	1.01	1.05	0.9	1.01	0.99	0.93	0.92	0.93
chrII	180001	180250	0.97	0.92	1.07	1.05	0.92	0.93	0.97	0.95	0.96	0.92
chrII	180251	180500	0.98	0.92	0.92	0.93	0.88	0.9	0.93	0.91	0.93	0.96
chrII	180501	180750	1	0.94	0.97	0.91	0.9	0.9	0.94	0.92	0.94	0.95
chrII	180751	181000	0.99	0.91	0.95	0.91	0.91	0.93	0.94	0.97	0.94	0.93
chrII	181001	181250	0.96	0.94	1.01	0.92	0.93	0.93	0.91	0.95	0.98	0.96
chrII	181251	181500	0.97	0.97	0.97	0.96	0.91	0.94	0.94	0.95	0.95	0.97
chrII	181501	181750	0.94	0.96	0.94	1.02	0.91	0.93	0.95	0.98	0.96	0.97
chrII	181751	182000	0.93	0.95	0.91	0.95	0.87	0.95	0.89	0.96	0.94	0.98
chrII	182001	182250	0.95	0.97	0.96	0.93	0.88	0.92	0.86	0.99	0.95	0.95
chrII	182251	182500	0.93	0.96	0.99	0.95	0.89	0.92	0.91	0.98	0.93	0.99
chrII	182501	182750	0.94	0.96	1	1.06	0.88	0.96	0.92	0.98	0.97	0.97
chrII	182751	183000	0.91	0.96	0.98	1.02	0.87	0.92	0.93	0.95	0.96	0.95
chrII	183001	183250	0.92	0.91	0.96	0.97	0.86	0.94	0.91	0.93	0.96	0.9
chrII	183251	183500	0.94	0.92	0.99	1.04	0.91	0.94	0.96	0.91	0.93	0.87
chrII	183501	183750	0.98	0.91	1.02	1.07	0.9	0.91	0.94	0.92	0.97	0.87
chrII	183751	184000	0.96	0.89	1	1.07	0.9	0.97	0.95	0.93	0.93	0.89
chrII	184001	184250	0.91	0.88	0.97	1.04	0.91	0.94	0.96	0.91	0.91	0.88
chrII	184251	184500	0.96	0.87	0.99	1.02	0.91	0.97	0.93	0.93	0.93	0.89
chrII	184501	184750	0.91	0.9	0.97	0.98	0.9	0.95	0.9	0.94	0.97	0.93
chrII	184751	185000	0.94	0.93	0.99	0.99	0.91	0.91	0.95	0.94	1.02	0.94
chrII	185001	185250	0.96	0.97	0.95	0.97	0.91	0.92	0.93	0.92	0.97	0.93
chrII	185251	185500	0.97	1.01	0.93	1.01	0.9	0.94	0.95	0.92	0.92	0.93
chrII	185501	185750	0.94	0.98	0.93	1.02	0.9	0.96	0.95	0.93	0.91	0.92
chrII	185751	186000	0.93	0.97	0.91	0.94	0.91	0.91	0.91	0.92	0.92	0.91
chrII	186001	186250	0.91	0.93	0.9	0.99	0.9	0.94	0.97	0.92	0.94	0.91
chrII	186251	186500	0.9	0.95	0.93	0.98	0.88	0.98	0.97	0.91	0.92	0.92
chrII	186501	186750	0.95	0.97	0.97	0.93	0.9	0.89	0.98	0.91	0.91	0.93
chrII	186751	187000	0.98	0.95	0.99	0.97	0.92	0.95	0.96	0.93	0.92	0.93
chrII	187001	187250	0.98	0.96	0.99	0.94	0.89	0.95	0.98	0.95	0.94	0.98
chrII	187251	187500	0.93	0.96	0.97	0.99	0.9	0.94	0.92	0.97	0.98	0.93
chrII	187501	187750	0.91	0.97	1.02	1	0.88	0.93	0.91	0.95	0.92	0.95
chrII	187751	188000	0.91	0.98	1	0.96	0.88	0.9	0.9	0.96	0.93	0.94
chrII	188001	188250	0.93	0.9	1.05	0.99	0.92	0.92	0.94	0.96	0.95	0.93
chrII	188251	188500	0.94	0.94	1	0.96	0.95	0.87	0.94	0.95	0.91	0.96
chrII	188501	188750	0.99	0.93	0.98	0.9	0.9	0.91	0.9	0.95	0.93	0.92
chrII	188751	189000	0.98	0.96	0.98	0.95	0.91	0.91	0.9	0.95	0.95	0.93
chrII	189001	189250	0.93	1.03	1.02	1.02	0.87	0.88	0.93	0.96	0.96	0.92
chrII	189251	189500	0.91	0.95	0.96	0.95	0.88	0.9	0.96	0.99	0.91	0.92
chrII	189501	189750	0.97	0.95	0.95	0.95	0.9	0.91	0.92	0.95	0.89	0.97
chrII	189751	190000	0.99	0.95	0.93	0.99	0.9	0.94	0.93	0.96	0.92	0.95
chrII	190001	190250	0.97	0.93	0.95	0.99	0.89	0.91	0.91	0.96	0.97	0.95
chrII	190251	190500	1	0.94	0.96	0.96	0.9	0.9	0.92	0.99	0.98	0.95
chrII	190501	190750	0.98	0.93	1.01	0.93	0.9	0.89	0.95	0.95	0.97	0.93
chrII	190751	191000	0.95	0.97	1.05	0.94	0.89	0.92	0.95	0.97	0.92	0.92
chrII	191001	191250	0.96	0.93	0.99	0.98	0.9	0.9	0.92	0.96	0.97	0.94
chrII	191251	191500	0.96	0.9	0.95	0.97	0.9	0.92	0.9	0.99	0.99	0.9
chrII	191501	191750	0.97	0.93	0.99	1.02	0.89	0.92	0.92	1	0.94	0.89
chrII	191751	192000	1	0.91	1.03	0.96	0.89	0.92	0.9	1.02	0.97	0.91
chrII	192001	192250	0.99	0.89	0.95	1.01	0.89	0.97	0.9	0.98	0.93	0.93
chrII	192251	192500	0.94	0.9	0.96	0.97	0.91	1.03	0.96	0.95	0.9	0.91
chrII	192501	192750	0.98	0.95	0.97	0.92	0.9	0.99	0.94	0.96	0.96	0.98
chrII	192751	193000	0.98	0.94	0.94	0.95	0.86	0.93	0.89	1.02	0.93	0.95
chrII	193001	193250	0.99	0.95	0.95	0.99	0.9	0.95	0.88	1	0.94	0.95
chrII	193251	193500	0.99	0.96	0.93	0.96	0.92	0.94	0.91	1.02	0.97	0.99
chrII	193501	193750	1	0.93	0.97	0.99	0.9	0.97	0.94	1.02	0.94	0.95
chrII	193751	194000	1.01	0.94	0.99	0.97	0.91	0.97	0.94	1.02	0.93	1
chrII	194001	194250	1.03	0.98	0.95	1.03	0.92	1.04	0.92	1	0.94	0.97
chrII	194251	194500	1	0.98	1	0.97	0.91	1.02	0.92	1.02	0.96	1.01
chrII	194501	194750	1.01	0.91	0.97	1.03	0.91	1	0.95	1.03	0.96	0.99
chrII	194751	195000	1.02	0.96	0.96	1.05	0.9	1.04	0.95	1.03	0.95	0.98
chrII	195001	195250	1.01	0.97	1.02	0.98	0.9	1.04	0.99	1.01	0.93	1.01
chrII	195251	195500	1.04	0.95	0.97	0.96	0.91	1.05	1	0.99	0.93	1.03
chrII	195501	195750	1.04	0.92	0.97	0.97	0.93	1.08	1.04	1.01	0.94	1
chrII	195751	196000	1.03	0.98	0.93	1.01	0.93	1.09	1.11	1.01	0.9	0.95
chrII	196001	196250	1.06	1.02	0.95	0.97	0.91	1.09	1.05	1.03	0.91	0.99
chrII	196251	196500	1.1	1.08	0.98	0.96	0.92	1.12	1.09	1.03	0.92	0.98
chrII	196501	196750	1.08	1.05	1.01	0.93	0.9	1.17	1.13	1.05	0.97	0.97
chrII	196751	197000	1.1	1.2	0.97	0.96	0.92	1.2	1.19	1.04	0.9	0.93
chrII	197001	197250	1.06	1.26	0.96	1	0.95	1.25	1.26	0.99	0.89	0.95
chrII	197251	197500	1.01	1.3	1.04	0.99	0.96	1.21	1.19	1.01	0.91	0.98
chrII	197501	197750	1.05	1.27	0.99	0.97	0.94	1.2	1.2	1.08	0.95	0.95
chrII	197751	198000	1	1.24	0.91	0.97	0.97	1.16	1.18	1.05	0.96	0.95
chrII	198001	198250	1.06	1.39	1	0.99	0.97	1.26	1.27	1.03	0.96	1
chrII	198251	198500	1.03	1.44	1.07	1.06	0.97	1.29	1.28	1.02	0.91	1
chrII	198501	198750	1.06	1.33	0.97	1.01	0.95	1.25	1.24	1.01	0.91	0.99
chrII	198751	199000	1.05	1.27	0.94	0.98	0.94	1.2	1.23	1.06	0.94	1
chrII	199001	199250	1.12	1.24	0.99	1.01	0.91	1.19	1.23	1.11	0.96	0.99
chrII	199251	199500	1.15	1.21	1.06	1	0.94	1.16	1.21	1.09	0.97	0.96
chrII	199501	199750	1.14	1.23	1.07	0.95	0.95	1.14	1.22	1.05	0.93	0.95
chrII	199751	200000	1.11	1.21	1.04	0.99	0.94	1.09	1.18	1.05	0.94	0.97
chrII	200001	200250	1.05	1.18	0.99	0.96	0.95	1.09	1.11	1.07	0.97	1
chrII	200251	200500	1.07	1.13	1.03	0.98	0.97	1.13	1.12	1.05	0.99	1
chrII	200501	200750	1.13	1.04	1.01	1	0.92	1.15	1.16	1.04	0.96	1
chrII	200751	201000	1.09	1.07	1.01	0.94	0.91	1.13	1.14	1.03	0.94	0.97
chrII	201001	201250	1.07	1.02	0.99	0.96	0.9	1.05	1.08	1.05	0.95	1.01
chrII	201251	201500	1.08	1.04	1.03	0.94	0.91	1.05	1.03	1.03	0.96	0.95
chrII	201501	201750	1.05	0.97	1.05	0.92	0.92	1.08	1.01	1.07	0.98	0.96
chrII	201751	202000	1.05	0.97	1.02	0.94	0.93	1.05	1.03	1.06	0.96	0.95
chrII	202001	202250	1.03	0.96	1	0.96	0.92	1	1	1.06	0.94	0.97
chrII	202251	202500	1	0.92	0.92	0.96	0.9	0.99	0.92	1.02	0.96	1.04
chrII	202501	202750	1.06	0.96	0.92	0.9	0.9	0.98	0.96	1.02	0.96	1.04
chrII	202751	203000	1.07	0.98	0.91	0.94	0.9	0.98	0.94	1.04	0.94	1.02
chrII	203001	203250	1.05	0.99	0.94	0.93	0.91	0.97	0.96	1.03	0.94	0.98
chrII	203251	203500	1.04	0.96	0.9	0.91	0.9	0.97	0.95	1	0.94	0.97
chrII	203501	203750	0.99	0.95	0.85	0.96	0.91	0.95	0.95	1.02	0.93	1
chrII	203751	204000	0.97	0.99	0.88	0.92	0.91	0.93	0.9	1.01	0.98	1.03
chrII	204001	204250	1	0.96	0.92	0.96	0.9	0.93	0.87	1.01	0.97	0.99
chrII	204251	204500	0.98	0.95	0.92	0.96	0.87	0.97	0.9	1	0.95	0.96
chrII	204501	204750	0.98	0.95	0.95	0.97	0.89	0.96	0.93	1	0.94	0.96
chrII	204751	205000	0.97	0.95	0.96	1	0.88	0.96	0.89	1.01	0.97	0.93
chrII	205001	205250	1	0.98	0.96	0.98	0.87	0.95	0.92	1.01	0.94	0.94
chrII	205251	205500	0.99	0.97	1.02	0.88	0.87	0.96	0.93	1.03	0.94	0.96
chrII	205501	205750	0.98	0.94	0.93	0.88	0.87	0.97	0.94	1.02	0.91	0.94
chrII	205751	206000	0.95	0.92	0.97	0.98	0.89	0.99	0.95	1.01	0.92	0.92
chrII	206001	206250	0.97	0.88	0.9	1.01	0.91	0.99	0.92	0.99	0.95	0.94
chrII	206251	206500	0.95	0.9	0.93	0.99	0.93	0.97	0.92	1	0.95	0.95
chrII	206501	206750	0.98	0.93	0.93	0.98	0.91	0.96	0.91	0.98	0.96	0.96
chrII	206751	207000	0.97	0.95	0.91	0.96	0.92	0.98	0.96	0.95	0.92	0.96
chrII	207001	207250	0.95	0.94	0.9	1	0.91	1	0.94	0.96	0.94	0.97
chrII	207251	207500	0.94	0.96	0.9	0.97	0.93	0.96	0.98	0.98	0.95	1.02
chrII	207501	207750	0.9	0.91	0.99	0.98	0.91	0.97	0.95	0.97	0.99	1
chrII	207751	208000	0.93	0.97	1.02	0.91	0.89	0.95	0.93	0.98	0.97	1.02
chrII	208001	208250	0.97	0.99	1.02	0.93	0.88	0.94	0.92	0.97	0.95	0.99
chrII	208251	208500	0.98	0.96	1.04	1	0.9	1.02	0.96	0.98	0.96	0.95
chrII	208501	208750	0.91	0.91	0.98	0.99	0.93	0.99	0.97	1.02	0.96	0.97
chrII	208751	209000	0.9	0.93	0.94	1.05	0.89	1	0.98	1.05	0.97	0.96
chrII	209001	209250	0.9	0.97	0.97	0.96	0.88	0.96	0.99	1.03	0.98	0.96
chrII	209251	209500	0.95	0.96	0.95	1	0.86	0.97	1.01	0.97	0.94	0.97
chrII	209501	209750	0.96	0.95	0.96	0.94	0.88	0.95	0.98	0.96	0.94	1.01
chrII	209751	210000	0.98	0.97	0.99	0.9	0.87	0.9	0.92	1	0.99	1.01
chrII	210001	210250	0.95	1.03	1.01	0.98	0.87	0.93	0.95	1	0.95	0.98
chrII	210251	210500	0.94	1.07	1.02	0.89	0.9	0.94	0.94	1.02	0.95	0.97
chrII	210501	210750	0.93	1.01	1.02	0.95	0.88	0.96	0.94	0.97	0.96	0.99
chrII	210751	211000	0.93	0.98	1.01	0.96	0.86	1	0.98	0.97	0.95	0.98
chrII	211001	211250	0.89	0.92	0.96	0.9	0.87	0.97	0.93	0.99	0.94	0.99
chrII	211251	211500	0.91	0.94	0.94	0.9	0.88	0.96	0.95	1.01	0.97	0.99
chrII	211501	211750	0.91	0.98	0.97	0.88	0.87	0.94	0.91	0.96	0.94	1
chrII	211751	212000	0.95	0.92	0.99	0.93	0.86	0.98	0.94	0.96	0.94	0.97
chrII	212001	212250	0.88	0.94	0.94	0.98	0.86	1	0.95	0.94	0.93	0.93
chrII	212251	212500	0.88	0.92	0.93	1.02	0.87	1.03	0.98	0.93	0.9	0.92
chrII	212501	212750	0.85	0.95	0.96	0.98	0.84	0.97	0.96	0.95	0.95	0.93
chrII	212751	213000	0.87	0.97	1.02	0.95	0.84	0.89	0.94	0.97	0.97	0.94
chrII	213001	213250	0.9	0.92	0.97	0.92	0.84	0.95	0.9	0.98	0.98	0.97
chrII	213251	213500	0.91	0.98	0.97	0.91	0.85	0.96	0.86	0.99	0.95	0.99
chrII	213501	213750	0.88	0.98	1	0.85	0.86	0.89	0.86	1	0.97	0.99
chrII	213751	214000	0.88	0.94	1.01	0.87	0.86	0.91	0.89	0.97	0.95	0.99
chrII	214001	214250	0.9	0.94	0.99	0.99	0.87	0.89	0.93	0.97	0.91	0.97
chrII	214251	214500	0.92	0.92	0.97	0.93	0.88	0.88	0.89	0.93	0.93	0.96
chrII	214501	214750	0.88	0.91	1.01	0.85	0.86	0.89	0.89	0.92	0.98	0.99
chrII	214751	215000	0.88	0.94	0.98	0.85	0.85	0.91	0.89	0.94	1	0.98
chrII	215001	215250	0.88	0.96	0.95	0.88	0.85	0.89	0.89	0.89	0.97	0.93
chrII	215251	215500	0.94	0.93	0.93	0.97	0.9	0.92	0.94	0.94	0.97	0.93
chrII	215501	215750	0.9	1	0.96	0.91	0.84	0.93	0.94	0.93	0.93	0.91
chrII	215751	216000	0.9	1.02	0.93	0.89	0.79	0.92	0.91	0.96	0.93	0.91
chrII	216001	216250	0.89	0.99	0.93	0.99	0.84	0.89	0.93	0.93	0.98	0.95
chrII	216251	216500	0.88	0.97	0.94	0.94	0.83	0.89	0.93	0.9	0.93	0.93
chrII	216501	216750	0.9	0.97	0.95	0.94	0.82	0.9	0.93	0.94	0.95	0.95
chrII	216751	217000	0.92	1	0.95	0.91	0.8	0.91	0.9	0.96	0.92	0.96
chrII	217001	217250	0.96	1	0.9	0.88	0.83	0.95	0.89	0.95	0.93	0.95
chrII	217251	217500	0.92	0.94	0.98	0.88	0.82	0.96	0.92	0.95	0.93	0.91
chrII	217501	217750	0.92	0.94	0.94	0.86	0.82	0.92	0.92	0.93	0.92	0.91
chrII	217751	218000	0.9	0.92	0.89	0.94	0.82	0.95	0.96	0.88	0.9	0.87
chrII	218001	218250	0.86	0.97	0.88	0.94	0.83	0.94	0.91	0.85	0.91	0.88
chrII	218251	218500	0.83	0.93	0.88	0.97	0.85	0.93	0.9	0.88	0.94	0.89
chrII	218501	218750	0.86	0.91	0.95	0.95	0.84	0.93	0.93	0.88	0.91	0.91
chrII	218751	219000	0.88	0.94	0.92	0.91	0.81	0.94	0.94	0.87	0.89	0.91
chrII	219001	219250	0.9	0.99	0.95	0.92	0.82	0.91	0.95	0.85	0.92	0.89
chrII	219251	219500	0.84	0.98	0.92	0.92	0.81	0.93	0.89	0.87	0.89	0.91
chrII	219501	219750	0.84	1	0.9	0.89	0.83	0.96	0.95	0.9	0.91	0.89
chrII	219751	220000	0.83	0.93	0.85	0.91	0.83	0.94	0.93	0.85	0.91	0.93
chrII	220001	220250	0.82	0.96	0.93	0.87	0.83	0.88	0.89	0.86	0.86	0.91
chrII	220251	220500	0.84	0.91	0.89	0.9	0.83	0.92	0.92	0.87	0.89	0.91
chrII	220501	220750	0.86	0.91	0.92	0.96	0.82	0.9	0.91	0.89	0.88	0.9
chrII	220751	221000	0.8	0.97	0.94	0.93	0.81	0.97	0.92	0.92	0.87	0.86
chrII	221001	221250	0.84	1.01	0.83	1.02	0.82	0.98	1.01	0.9	0.91	0.86
chrII	221251	221500	0.78	0.98	0.92	1.04	0.83	0.94	0.91	0.92	0.9	0.9
chrII	221501	221750	0.85	0.96	0.96	0.91	0.84	0.87	0.85	0.9	0.88	0.94
chrII	221751	222000	0.9	0.97	1.01	0.95	0.86	0.88	0.93	0.93	0.91	0.92
chrII	222001	222250	0.89	0.93	0.98	0.95	0.85	0.92	0.95	0.91	0.89	0.91
chrII	222251	222500	0.9	0.91	0.99	0.87	0.85	0.89	0.95	0.9	0.85	0.91
chrII	222501	222750	0.91	0.92	0.96	0.9	0.83	0.91	0.88	0.9	0.86	0.91
chrII	222751	223000	0.96	0.93	1.03	0.92	0.87	0.95	0.92	0.89	0.93	0.96
chrII	223001	223250	0.97	0.96	1.01	0.91	0.89	0.95	0.92	0.93	0.98	0.97
chrII	223251	223500	0.98	0.96	1.02	0.96	0.9	0.96	0.91	0.98	0.94	0.97
chrII	223501	223750	0.97	0.95	1.04	0.99	0.92	0.96	0.92	0.99	0.94	0.95
chrII	223751	224000	0.96	0.94	1.01	0.96	0.9	0.95	0.93	0.96	0.94	0.94
chrII	224001	224250	0.94	0.95	1.02	0.93	0.86	0.9	0.94	0.97	0.92	0.95
chrII	224251	224500	0.94	0.97	0.95	0.95	0.86	0.93	0.95	0.92	0.92	0.93
chrII	224501	224750	0.92	0.95	0.97	0.99	0.88	0.9	0.93	0.92	0.92	0.92
chrII	224751	225000	0.92	0.95	0.97	0.97	0.9	0.92	0.98	0.91	0.92	0.91
chrII	225001	225250	0.94	0.93	0.94	0.95	0.9	0.96	0.99	0.93	0.88	0.91
chrII	225251	225500	0.92	0.96	1	0.98	0.87	0.94	0.98	0.92	0.89	0.92
chrII	225501	225750	0.9	0.97	0.99	1	0.87	0.96	0.98	0.92	0.92	0.91
chrII	225751	226000	0.88	0.96	1.05	0.95	0.87	0.98	0.97	0.9	0.9	0.91
chrII	226001	226250	0.9	0.98	1.02	0.99	0.88	0.97	0.99	0.88	0.88	0.91
chrII	226251	226500	0.9	1.03	0.96	1.02	0.88	0.99	0.98	0.89	0.88	0.89
chrII	226501	226750	0.86	1.04	0.89	0.97	0.86	1.02	0.98	0.91	0.87	0.88
chrII	226751	227000	0.8	0.99	0.9	0.95	0.85	0.94	1.03	0.88	0.84	0.89
chrII	227001	227250	0.81	0.91	0.85	0.88	0.79	0.9	0.95	0.84	0.81	0.87
chrII	227251	227500	0.88	0.96	0.85	0.85	0.81	0.89	0.94	0.86	0.84	0.87
chrII	227501	227750	0.92	0.95	0.87	0.83	0.81	0.91	0.97	0.88	0.88	0.88
chrII	227751	228000	0.87	0.87	0.91	0.9	0.82	0.9	0.97	0.87	0.83	0.89
chrII	228001	228250	0.85	0.89	0.94	0.94	0.81	0.9	0.92	0.87	0.8	0.89
chrII	228251	228500	0.88	0.92	0.92	0.85	0.8	0.87	0.92	0.89	0.82	0.87
chrII	228501	228750	0.85	1	0.93	0.81	0.8	0.94	0.94	0.88	0.89	0.87
chrII	228751	229000	0.71	1.03	0.9	0.8	0.84	0.94	0.96	0.91	0.9	0.8
chrII	229001	229250	0.77	1.04	0.94	0.87	0.86	0.93	0.96	0.88	0.92	0.84
chrII	229251	229500	0.95	0.99	0.91	0.89	0.84	0.91	0.94	0.89	0.93	0.83
chrII	229501	229750	0.96	0.94	0.91	0.86	0.84	0.91	0.91	0.96	0.92	0.86
chrII	229751	230000	1	0.9	0.88	0.87	0.82	0.91	0.92	0.97	0.97	0.87
chrII	230001	230250	1.03	0.94	0.91	0.85	0.84	0.9	0.92	0.98	0.98	0.88
chrII	230251	230500	1.03	0.96	0.88	0.83	0.83	0.87	0.93	1.02	0.94	0.9
chrII	230501	230750	1.01	0.95	0.91	0.86	0.86	0.85	0.95	1.02	0.95	0.89
chrII	230751	231000	1	0.94	0.91	0.88	0.88	0.9	0.97	1.02	0.94	0.87
chrII	231001	231250	1.03	0.93	0.97	0.82	0.92	0.93	0.93	1.07	0.98	0.93
chrII	231251	231500	1.02	0.9	0.88	0.84	0.92	0.93	0.94	1.08	0.99	0.89
chrII	231501	231750	1.07	0.89	0.9	0.85	0.93	0.92	0.95	1.09	1.02	0.88
chrII	231751	232000	1.07	0.89	0.88	0.84	0.92	0.91	0.94	1.13	1.08	0.92
chrII	232001	232250	1.03	0.91	0.92	0.76	0.91	0.96	0.94	1.13	1.02	0.96
chrII	232251	232500	1.04	0.99	0.91	0.85	0.95	0.98	0.94	1.08	1.06	0.99
chrII	232501	232750	1.11	0.93	0.92	0.89	0.98	1.02	0.99	1.13	1.04	1
chrII	232751	233000	1.16	0.97	0.93	0.93	0.97	1.03	0.98	1.2	1.06	1.02
chrII	233001	233250	1.17	0.92	0.99	0.86	0.97	1.04	0.97	1.18	1.1	1.04
chrII	233251	233500	1.22	0.94	0.97	0.86	1.05	1.05	0.96	1.19	1.13	1.04
chrII	233501	233750	1.24	0.94	1.01	0.89	1.08	1.07	0.92	1.27	1.22	1.1
chrII	233751	234000	1.19	0.95	1	0.97	1.11	1.07	0.93	1.3	1.26	1.12
chrII	234001	234250	1.15	0.92	1.07	0.93	1.1	1.1	0.97	1.32	1.22	1.17
chrII	234251	234500	1.19	0.98	1.13	0.93	1.12	1.11	1.02	1.32	1.27	1.17
chrII	234501	234750	1.24	0.98	1.11	0.91	1.11	1.12	1	1.29	1.27	1.18
chrII	234751	235000	1.25	0.99	1.13	0.95	1.13	1.19	1.05	1.33	1.25	1.21
chrII	235001	235250	1.23	0.98	1.1	1.06	1.19	1.27	1.09	1.31	1.23	1.26
chrII	235251	235500	1.23	1.02	1.12	1.1	1.21	1.25	1.06	1.33	1.25	1.25
chrII	235501	235750	1.31	1.07	1.16	1.06	1.19	1.23	1.06	1.39	1.3	1.26
chrII	235751	236000	1.26	1.09	1.16	1.19	1.24	1.31	1.11	1.4	1.36	1.27
chrII	236001	236250	1.23	1.14	1.23	1.14	1.24	1.27	1.13	1.39	1.42	1.35
chrII	236251	236500	1.28	1.19	1.16	1.19	1.23	1.28	1.17	1.39	1.35	1.32
chrII	236501	236750	1.32	1.21	1.19	1.17	1.24	1.29	1.18	1.41	1.33	1.35
chrII	236751	237000	1.37	1.22	1.21	1.17	1.27	1.29	1.22	1.38	1.29	1.38
chrII	237001	237250	1.27	1.3	1.27	1.21	1.26	1.33	1.24	1.39	1.31	1.35
chrII	237251	237500	1.29	1.32	1.3	1.3	1.28	1.26	1.2	1.41	1.36	1.37
chrII	237501	237750	1.31	1.27	1.27	1.23	1.3	1.32	1.21	1.41	1.34	1.34
chrII	237751	238000	1.27	1.26	1.24	1.21	1.27	1.4	1.22	1.38	1.35	1.29
chrII	238001	238250	1.27	1.25	1.24	1.24	1.3	1.47	1.33	1.35	1.32	1.28
chrII	238251	238500	1.22	1.3	1.23	1.25	1.31	1.45	1.24	1.35	1.33	1.29
chrII	238501	238750	1.24	1.24	1.27	1.16	1.29	1.38	1.22	1.36	1.34	1.31
chrII	238751	239000	1.27	1.28	1.25	1.14	1.26	1.36	1.22	1.4	1.31	1.3
chrII	239001	239250	1.29	1.28	1.26	1.11	1.22	1.28	1.17	1.43	1.33	1.35
chrII	239251	239500	1.29	1.3	1.29	1.1	1.23	1.28	1.17	1.42	1.31	1.29
chrII	239501	239750	1.22	1.2	1.15	1.14	1.26	1.26	1.15	1.38	1.25	1.29
chrII	239751	240000	1.23	1.1	1.15	1.13	1.19	1.27	1.08	1.38	1.24	1.26
chrII	240001	240250	1.2	1.05	1.13	1.05	1.16	1.25	1.06	1.33	1.28	1.23
chrII	240251	240500	1.23	1.01	1.09	1	1.19	1.26	1.09	1.28	1.24	1.26
chrII	240501	240750	1.19	0.97	1.02	1.07	1.14	1.21	1.08	1.3	1.27	1.26
chrII	240751	241000	1.18	1	1.04	1.04	1.13	1.16	1.03	1.3	1.29	1.16
chrII	241001	241250	1.15	0.98	1.01	0.91	1.13	1.13	0.99	1.3	1.25	1.14
chrII	241251	241500	1.1	0.91	0.88	0.96	1.1	1.16	1.02	1.28	1.2	1.1
chrII	241501	241750	1.12	0.92	0.9	0.86	1	1.07	1.01	1.23	1.17	1.04
chrII	241751	242000	1.12	0.87	0.92	0.79	0.99	1.04	0.93	1.25	1.13	1.02
chrII	242001	242250	1.14	0.89	0.91	0.84	0.99	1	0.89	1.25	1.12	1.04
chrII	242251	242500	1.13	0.93	0.91	0.81	0.97	1.02	0.92	1.26	1.07	1.04
chrII	242501	242750	1.08	0.93	0.91	0.85	1	0.96	0.96	1.24	1.1	0.99
chrII	242751	243000	1.08	0.9	0.89	0.84	1.02	0.95	0.9	1.2	1.11	0.95
chrII	243001	243250	1.08	0.9	0.89	0.85	0.97	0.93	0.87	1.14	1.08	0.98
chrII	243251	243500	1.01	0.89	0.88	0.76	0.92	0.93	0.85	1.15	1.13	0.95
chrII	243501	243750	1.05	0.88	0.88	0.84	0.93	0.88	0.86	1.15	1.06	0.92
chrII	243751	244000	1.03	0.87	0.86	0.8	0.91	0.88	0.92	1.11	1.03	0.86
chrII	244001	244250	1	0.83	0.84	0.81	0.91	0.86	0.89	1.06	0.97	0.83
chrII	244251	244500	0.95	0.85	0.82	0.88	0.88	0.91	0.94	1.05	0.98	0.79
chrII	244501	244750	0.93	0.86	0.79	0.8	0.87	0.9	0.92	1.03	0.92	0.84
chrII	244751	245000	0.96	0.96	0.86	0.81	0.86	0.91	0.94	0.99	0.88	0.84
chrII	245001	245250	0.96	0.95	0.83	0.87	0.85	0.87	0.96	0.99	0.89	0.83
chrII	245251	245500	0.96	0.95	0.84	0.88	0.83	0.88	0.96	0.94	0.84	0.77
chrII	245501	245750	0.94	0.92	0.89	0.85	0.83	0.89	0.95	0.93	0.83	0.8
chrII	245751	246000	0.96	0.88	0.86	0.85	0.74	0.82	1.03	0.93	0.97	0.83
chrII	246001	246250	0.92	0.9	0.87	0.76	0.81	0.81	0.89	0.93	0.89	0.88
chrII	246251	246500	0.95	0.94	0.86	0.82	0.8	0.81	0.91	0.94	0.87	0.85
chrII	246501	246750	0.95	0.91	0.83	0.87	0.81	0.84	0.96	0.97	0.89	0.81
chrII	246751	247000	1	0.91	0.89	0.86	0.81	0.83	0.92	0.94	0.89	0.78
chrII	247001	247250	0.99	0.89	0.89	0.79	0.8	0.87	0.87	0.98	0.88	0.84
chrII	247251	247500	1.02	0.89	0.9	0.77	0.8	0.85	0.87	1.03	0.9	0.86
chrII	247501	247750	1.04	0.92	0.95	0.81	0.81	0.85	0.89	1.01	0.86	0.89
chrII	247751	248000	1.04	0.95	0.94	0.82	0.87	0.86	0.86	1.04	0.91	0.9
chrII	248001	248250	1.02	0.96	0.89	0.84	0.87	0.85	0.87	1.02	0.93	0.93
chrII	248251	248500	1.03	0.92	0.86	0.83	0.87	0.9	0.87	1.02	0.91	0.88
chrII	248501	248750	1.01	0.9	0.79	0.86	0.87	0.95	0.92	1.03	0.94	0.87
chrII	248751	249000	1.02	0.88	0.88	0.81	0.86	0.95	0.92	1.11	0.98	0.92
chrII	249001	249250	1.07	0.85	0.95	0.78	0.91	0.91	0.88	1.16	1.03	0.92
chrII	249251	249500	1.11	0.92	0.93	0.77	0.94	0.91	0.92	1.18	1.06	0.96
chrII	249501	249750	1.15	0.95	1	0.81	0.97	0.98	0.88	1.18	1.08	0.95
chrII	249751	250000	1.16	0.95	0.94	0.79	1.01	1.04	0.93	1.21	1.04	0.97
chrII	250001	250250	1.17	0.9	0.96	0.82	1.02	1.12	0.94	1.23	1.07	0.99
chrII	250251	250500	1.14	0.88	0.93	0.92	1.01	1.16	0.98	1.21	1.1	0.98
chrII	250501	250750	1.18	0.9	1	0.88	1	1.13	0.97	1.23	1.08	1.07
chrII	250751	251000	1.26	0.94	0.96	0.9	1.03	1.13	0.98	1.27	1.16	1.12
chrII	251001	251250	1.21	0.97	1.03	0.94	1.1	1.18	1	1.3	1.19	1.18
chrII	251251	251500	1.23	1	1.04	0.9	1.09	1.23	0.98	1.3	1.25	1.21
chrII	251501	251750	1.22	0.97	1.1	0.98	1.1	1.27	1.07	1.34	1.24	1.19
chrII	251751	252000	1.23	1.09	1.15	1.05	1.13	1.36	1.14	1.31	1.22	1.2
chrII	252001	252250	1.26	1.15	1.19	1.12	1.17	1.42	1.18	1.3	1.23	1.2
chrII	252251	252500	1.31	1.15	1.16	1.11	1.2	1.32	1.22	1.36	1.25	1.22
chrII	252501	252750	1.32	1.17	1.18	1	1.2	1.33	1.15	1.4	1.27	1.22
chrII	252751	253000	1.33	1.23	1.22	1.02	1.21	1.33	1.13	1.36	1.3	1.27
chrII	253001	253250	1.27	1.3	1.24	1.11	1.21	1.39	1.2	1.4	1.31	1.34
chrII	253251	253500	1.3	1.32	1.26	1.19	1.23	1.35	1.22	1.36	1.33	1.34
chrII	253501	253750	1.32	1.31	1.27	1.13	1.23	1.31	1.24	1.36	1.31	1.38
chrII	253751	254000	1.35	1.34	1.22	1.1	1.27	1.35	1.24	1.4	1.35	1.38
chrII	254001	254250	1.35	1.31	1.29	1.14	1.3	1.38	1.29	1.45	1.35	1.38
chrII	254251	254500	1.34	1.41	1.33	1.23	1.3	1.46	1.35	1.43	1.33	1.35
chrII	254501	254750	1.38	1.32	1.3	1.23	1.27	1.43	1.26	1.45	1.28	1.3
chrII	254751	255000	1.34	1.25	1.26	1.27	1.27	1.48	1.25	1.4	1.35	1.3
chrII	255001	255250	1.28	1.32	1.2	1.28	1.32	1.49	1.33	1.37	1.33	1.27
chrII	255251	255500	1.33	1.37	1.25	1.19	1.26	1.4	1.3	1.39	1.33	1.35
chrII	255501	255750	1.26	1.26	1.22	1.16	1.24	1.38	1.27	1.39	1.3	1.36
chrII	255751	256000	1.31	1.34	1.22	1.17	1.23	1.37	1.22	1.48	1.37	1.4
chrII	256001	256250	1.34	1.35	1.19	1.16	1.24	1.38	1.21	1.44	1.37	1.36
chrII	256251	256500	1.27	1.32	1.17	1.12	1.27	1.36	1.23	1.42	1.35	1.31
chrII	256501	256750	1.26	1.3	1.15	1.07	1.25	1.36	1.21	1.42	1.36	1.39
chrII	256751	257000	1.17	1.27	1.14	1.18	1.26	1.42	1.24	1.42	1.37	1.32
chrII	257001	257250	1.25	1.22	1.2	1.09	1.19	1.35	1.19	1.42	1.34	1.34
chrII	257251	257500	1.35	1.2	1.27	1.13	1.19	1.32	1.14	1.4	1.31	1.36
chrII	257501	257750	1.35	1.13	1.21	1.04	1.18	1.31	1.09	1.41	1.29	1.35
chrII	257751	258000	1.3	1.1	1.17	1.05	1.17	1.28	1.1	1.44	1.23	1.32
chrII	258001	258250	1.28	1.03	1.17	1.07	1.21	1.3	1.16	1.39	1.27	1.25
chrII	258251	258500	1.26	0.95	1.07	1.03	1.2	1.3	1.11	1.38	1.27	1.17
chrII	258501	258750	1.2	0.94	1.03	0.99	1.17	1.26	1.04	1.33	1.18	1.17
chrII	258751	259000	1.58	1.06	0.97	0.84	1.34	1.32	1.07	1.2	1.31	1.21
chrII	259001	259250	0	0	0	0	0	0	0	0	0	0
chrII	259251	259500	0	0	0	0	0	0	0	0	0	0
chrII	259501	259750	0.91	0.95	0.96	1.06	1.01	0.96	1.06	0.91	1	0.98
chrII	259751	260000	0.97	1.03	1.05	0.95	0.94	0.97	1.01	0.95	0.98	0.99
chrII	260001	260250	0.99	1.05	0.97	0.91	0.92	0.95	0.97	0.98	0.96	1
chrII	260251	260500	1.02	1.03	1.03	0.94	0.94	0.96	0.98	1	0.96	0.98
chrII	260501	260750	1	1.03	1.08	1.05	0.96	0.97	0.98	1.02	0.97	0.97
chrII	260751	261000	1	0.96	1.05	0.95	0.94	0.97	0.99	0.98	0.94	1
chrII	261001	261250	1.02	0.96	1.09	0.92	0.94	0.94	0.98	0.99	0.91	0.99
chrII	261251	261500	0.99	0.97	1.02	0.96	0.96	0.93	0.99	1.01	0.93	0.98
chrII	261501	261750	0.95	0.97	0.99	0.93	0.93	0.96	0.95	0.95	0.94	0.96
chrII	261751	262000	0.98	0.98	1.01	0.9	0.92	0.91	0.93	0.96	0.95	0.97
chrII	262001	262250	0.99	1	0.97	0.98	0.92	0.93	0.94	0.95	0.97	0.98
chrII	262251	262500	0.99	0.98	1.01	0.91	0.89	0.95	0.95	0.99	0.93	0.96
chrII	262501	262750	0.95	0.95	1.01	0.87	0.87	0.96	0.97	0.95	0.95	0.96
chrII	262751	263000	0.91	1	0.97	0.83	0.89	0.97	0.94	0.93	0.93	0.98
chrII	263001	263250	0.93	1.07	0.94	0.99	0.95	0.91	0.9	0.95	0.96	0.97
chrII	263251	263500	0.92	0.95	0.99	1.08	0.96	1.01	0.98	0.96	0.97	0.88
chrII	263501	263750	0.88	0.98	0.95	0.88	0.9	0.95	0.98	0.91	0.91	0.9
chrII	263751	264000	0.91	0.99	0.97	0.9	0.9	1	0.96	0.91	0.91	0.94
chrII	264001	264250	0.98	1.01	0.9	0.99	0.94	1	1.01	0.94	0.93	0.9
chrII	264251	264500	0.94	1.01	0.91	1.04	0.93	1	1.02	0.93	0.95	0.89
chrII	264501	264750	0.92	1.03	0.98	0.99	0.91	0.99	1.05	0.93	0.92	0.87
chrII	264751	265000	0.91	1.04	0.98	0.95	0.91	0.97	1.04	0.93	0.91	0.9
chrII	265001	265250	0.89	1.03	0.92	0.94	0.87	0.98	1.05	0.89	0.86	0.87
chrII	265251	265500	0.82	1.02	0.84	1.02	0.89	1	1.05	0.91	0.86	0.87
chrII	265501	265750	0	0	0	0	0	0	0	0	0	0
chrII	265751	266000	0	0	0	0	0	0	0	0	0	0
chrII	266001	266250	1.28	0.93	0.94	1.22	1.09	1.25	1.09	1.32	1.24	1.1
chrII	266251	266500	1.11	0.93	1.02	0.92	1.11	1.22	1.09	1.26	1.16	1.11
chrII	266501	266750	1.22	0.94	0.92	0.93	1.11	1.17	1.02	1.3	1.13	1.08
chrII	266751	267000	1.23	0.96	0.95	0.89	1.04	1.14	0.92	1.27	1.13	1.09
chrII	267001	267250	1.23	0.92	0.92	0.9	1.02	1.07	0.95	1.25	1.15	1.07
chrII	267251	267500	1.15	0.89	0.94	0.98	1.01	1.11	0.99	1.25	1.12	0.99
chrII	267501	267750	1.13	0.87	0.9	0.93	1.03	1.06	1.01	1.27	1.14	0.97
chrII	267751	268000	1.2	0.94	0.95	0.92	1.03	1.06	0.92	1.24	1.12	0.94
chrII	268001	268250	1.11	0.95	0.97	0.87	0.98	1.03	0.91	1.17	1.12	1.01
chrII	268251	268500	1.12	0.9	0.97	0.82	0.94	1.02	0.89	1.16	1.07	1.01
chrII	268501	268750	1.1	0.91	0.93	0.8	0.96	0.98	0.88	1.19	1.07	1.02
chrII	268751	269000	1.1	0.96	0.94	0.86	0.98	0.92	0.93	1.19	1.11	0.98
[truncated: 46,640 more rows]
