# Supplementary material for: The role of Rif1 in telomere length regulation is separable from its role in origin firing
Source: eLife. 2020 Jun 29;9:e58066. doi: 10.7554/eLife.58066 (PMC7371424; doi:10.7554/eLife.58066)
Supplement: Supplementary file 3. [file elife-58066-supp3.xlsx]

## Sheet: Origins used in analysis
Midpoint of origin is denoted and highlight in grey
Each number is 250bp relative copy number score
Heatmaps	5kb about and below origin midpoint, data is sorted highest to lowest after adding the relative copy number scores for the 10kb around the midpoint.
	data was then transposed and heatmap.2 was used to generate a heatmap in R
	data for 1kb around the midpoint was summed (midpoint +- 500bp) and divided by 5 to get an average relative copy number score
Scatter plot	data was sorted by ARS, multiplied by 1.25, and imported and graphed in Prism
Dot plot	data was sorted by ARS, WT was subtracted from mutant, and result was multiplied by 100, imported and graphed in Prism
http://cerevisiae.oridb.org
	Start (OriDB)	End (OriDB)	Midpoint
ARS102.5	6136	7136	6636
ARS103	7998	8548	8273
ARS104	30946	31184	31065
ARS105	40716	43300	42008
ARS106	70258	70491	70374.5
ARS107	124350	124599	124474
ARS107.5	136900	137900	137400
ARS108	146703	147690	147196
ARS109	159906	160127	160016
ARS110	176154	176402	176278
ARS111	214879	215635	215257
ARS112	222871	224037	223454
ARS201	6123	7127	6625
ARS201.5	28933	29152	29042.5
ARS201.7	38623	39068	38845.5
ARS202	63186	63421	63303.5
ARS203	93410	93811	93610.5
ARS206	142868	144016	143442
ARS207	170049	170298	170174
ARS207.1	177529	177877	177703
ARS207.5	198193	198434	198314
ARS207.8	209187	210063	209625
ARS208	237644	237879	237762
ARS209	254890	255136	255013
ARS210.5	283015	283913	283464
ARS211	326099	326335	326217
ARS212	378434	379194	378814
ARS213	389245	390368	389806
ARS214	407831	408064	407948
ARS215	417739	418035	417887
ARS215.5	440859	441697	441278
ARS216	486661	486909	486785
ARS217	516805	517805	517305
ARS218	539137	539699	539418
ARS219	591424	591713	591568
ARS219.5	611269	613200	612234
ARS220	622625	622894	622760
ARS221	631934	632246	632090
ARS221.5	675947	676667	676307
ARS222	704250	704521	704386
ARS222.5	707158	708262	707710
ARS223	720601	721038	720820
ARS225	757621	757621	757621
ARS224	741512	741802	741657
ARS227	773918	774348	774133
ARS228	792116	792340	792228
ARS228.5	796259	797162	796710
ARS229	801930	802617	802274
ARS301	11145	11401	11273
ARS302	11303	14854	13078.5
ARS302	14574	14849	14711.5
ARS303	14870	15213	15041.5
ARS320	15213	16274	15743.5
ARS304	30199	30657	30428
ARS305	39158	39706	39432
ARS306	74457	74677	74567
ARS307	108775	109291	109033
ARS308	114314	114933	114624
ARS309	131978	132322	132150
ARS310	166494	167340	166917
ARS313	194256	194505	194380
ARS314	197369	197601	197485
ARS314.5	203876	207534	205705
ARS315	224807	225053	224930
ARS316	272844	273088	272966
ARS317	292524	292826	292675
ARS318	294396	295027	294712
ARS403	15492	15739	15615.5
ARS402.5	21265	22262	21763.5
ARS404	46181	46237	46209
ARS405	85945	86177	86061
ARS405.5	100380	101355	100868
ARS406	123617	123902	123760
ARS407	137445	137808	137626
ARS408	157744	158235	157990
ARS409	212420	212669	212544
ARS409.3	232140	232618	232379
ARS409.5	235935	236184	236060
ARS410	253789	254038	253914
ARS412	316719	317111	316915
ARS413	329564	329813	329688
ARS413.5	350835	351804	351320
ARS414	408070	408312	408191
ARS415	435056	435388	435222
ARS416	462430	462700	462565
ARS417	483846	484091	483968
ARS417.5	505336	505578	505457
ARS418	555224	555461	555342
ARS419	567490	567737	567614
ARS420	629072	629669	629370
ARS421	639859	640108	639984
ARS422	702879	703125	703002
ARS422.5	748384	748630	748507
ARS423	753159	753391	753275
ARS425	806044	806270	806157
ARS426.5	844597	845593	845095
ARS427.5	903824	904655	904240
ARS428	913780	914029	913904
ARS429	921682	921930	921806
ARS429.5	942983	943975	943479
ARS430	1016624	1016922	1016773
ARS430.5	1033069	1034182	1.03363e+06
ARS431	1057828	1058076	1057952
ARS431.5	1109955	1110196	1.11008e+06
ARS431.7	1130672	1131155	1.13091e+06
ARS432	1159250	1159499	1.15937e+06
ARS432.5	1165998	1166221	1.16611e+06
ARS433	1240869	1241098	1.24098e+06
ARS434	1276212	1276440	1276326
ARS435	1302579	1302819	1302699
ARS437	1353494	1353667	1.35358e+06
ARS439.5	1385151	1385630	1.38539e+06
ARS440	1404277	1404512	1.40439e+06
ARS441	1447298	1448928	1448113
ARS442	1461849	1462161	1462005
ARS446	1486905	1487149	1487027
ARS447	4097	4185	4141
ARS905	6464	7230	6847
ARS907	8786	10019	9402.5
ARS908	11713	12194	11953.5
ARS909	59282	59516	59399
ARS911	93977	94218	94097.5
ARS911.5	145539	145782	145660
ARS912	173636	173874	173755
ARS913	192493	192926	192710
ARS913.5	212381	212630	212506
ARS914	276127	276526	276326
ARS916	278073	278355	278214
ARS919	287504	287750	287627
ARS920	301565	302061	301813
ARS922	353504	353751	353628
ARS922.5	406747	406949	406848
ARS503	438929	439178	439054
ARS504	442412	442731	442572
ARS504.2	498417	499343	498880
ARS507	520767	521025	520896
ARS508	549560	549809	549684
ARS510	569020	570085	569552
ARS511	5435	6155	5795
ARS511.5	12174	13028	12601
ARS512	18682	19864	19273
ARS513.5	19669	20826	20247.5
ARS513.7	32472	32995	32733.5
ARS514	32666	33247	32956.5
ARS514.5	68690	68869	68779.5
ARS516	104456	104695	104576
ARS517	118631	118952	118792
ARS518	127745	128066	127906
ARS519	135979	136080	136030
ARS520	167606	168041	167824
ARS521	199382	199493	199438
ARS522	216344	216692	216518
ARS523	253316	253800	253558
ARS600.1	256263	256418	256340
ARS600.2	17629	18112	17870.5
ARS600.3	64279	64528	64403.5
ARS600.4	112080	112319	112200
ARS601	117471	117955	117713
ARS602	163180	163447	163314
ARS603	187241	187651	187446
ARS603.1	203917	204159	204038
ARS603.5	231909	231984	231946
ARS604	240972	241441	241206
ARS605	285951	286246	286098
ARS606	352695	352917	352806
ARS607	388658	388892	388775
ARS608	421093	421342	421218
ARS608.5	484932	485160	485046
ARS609	508729	508978	508854
ARS700.5	568490	568738	568614
ARS702	574622	574916	574769
ARS704	607176	607619	607398
ARS706	653611	654091	653851
ARS707	659809	660054	659932
ARS709	715273	715556	715414
ARS710	777967	778216	778092
ARS711	834492	834736	834614
ARS712	888350	888599	888474
ARS714	916675	917170	916922
ARS716	977730	977979	977854
ARS717	999448	999695	999572
ARS718	1002182	1002571	1.00238e+06
ARS719	1063254	1063715	1.06348e+06
ARS720	1082959	1084336	1.08365e+06
ARS721	5158	6168	5663
ARS722	7534	7782	7658
ARS724.5	45589	46076	45832.5
ARS726	64255	64489	64372
ARS727	94759	95192	94975.5
ARS728	111293	111766	111530
ARS729	133347	133591	133469
ARS731	140340	141265	140802
ARS731.5	168531	168773	168652
ARS732	213179	213861	213520
ARS733	245719	245968	245844
ARS734	296882	297475	297178
ARS735	359469	359928	359698
ARS735.5	392148	392391	392270
ARS131a	406012	406508	406260
ARS131n	447619	447853	447736
ARS802	474309	474793	474551
ARS804	501751	501992	501872
ARS805	520016	520630	520323
ARS805.5	535403	535836	535620
ARS805.7	555996	556327	556162
ARS807	33335	33803	33569
ARS808	73803	74220	74011.5
ARS809	80058	80557	80307.5
ARS810	105821	106048	105934
ARS813	136094	136335	136214
ARS815	162936	163302	163119
ARS816	175034	175355	175194
ARS818	214675	214826	214750
ARS818.5	245694	245932	245813
ARS820	247579	247800	247690
ARS821	310583	311070	310826
ARS822	341853	342096	341974
ARS823	357156	357393	357274
ARS823.5	411817	412053	411935
ARS824	432496	432994	432745
ARS1002	7444	7943	7693.5
ARS1003	16123	16762	16442.5
ARS1004	23661	24158	23909.5
ARS1005	67467	67949	67708
ARS1006	99359	99796	99577.5
ARS1007	113226	113828	113527
ARS1007.5	161435	161860	161648
ARS1008	203729	204614	204172
ARS1009	228248	228740	228494
ARS1009.5	248600	249300	248950
ARS1010	298471	298952	298712
ARS1011	336976	337225	337100
ARS1012	374575	374818	374696
ARS1013	375401	375923	375662
ARS1014	416888	417134	417011
ARS1015	442248	442658	442453
ARS1016	454276	455248	454762
ARS1017	459029	459588	459308
ARS1017.5	501595	502525	502060
ARS1018	540239	540474	540356
ARS1018.5	609000	609750	609375
ARS1019	612542	612975	612758
ARS1020	654069	654309	654189
ARS1021	683328	683817	683572
ARS1022	711590	711837	711714
ARS1023	729677	730208	729942
ARS1024	736728	736970	736849
ARS1102.5	42110	42563	42336.5
ARS1103	55670	55917	55793.5
ARS1104.5	98329	98568	98448.5
ARS1105.5	145433	145893	145663
ARS1106	152934	153173	153054
ARS1106.3	196038	196284	196161
ARS1106.5	199886	200537	200212
ARS1106.7	213080	213385	213232
ARS1107	257390	257839	257614
ARS1107.5	302152	302524	302338
ARS1109	329322	329571	329446
ARS1112	388607	388902	388754
ARS1113	416822	417055	416938
ARS1113.5	444561	445028	444794
ARS1114	447657	447892	447774
ARS1114.5	454453	459197	456825
ARS1116	516653	516902	516778
ARS1117	530070	530560	530315
ARS1118	581468	581706	581587
ARS1120	611874	612107	611990
ARS1123	642355	642602	642478
ARS1203	51860	52210	52035
ARS1205	76711	77163	76937
ARS1206	91417	91659	91538
ARS1206.5	93166	93659	93412.5
ARS1208	150914	151421	151168
ARS1209	156646	156883	156764
ARS1210	222410	222792	222601
ARS1211	231179	231422	231300
ARS1211.5	243527	243960	243744
ARS1212	289220	289469	289344
ARS1212.5	343577	344033	343805
ARS1213	373156	373400	373278
ARS1215	412668	412897	412782
ARS1216	450485	450726	450606
ARS1216.5	458826	459141	458984
ARS1217	512868	513117	512992
ARS1218	602938	603155	603046
ARS1219	622672	623123	622898
ARS1219.7	644937	645426	645182
ARS1220	659823	660072	659948
ARS1220.5	687249	687738	687494
ARS1222	730275	730832	730554
ARS1223	744942	745179	745060
ARS1226	794020	794269	794144
ARS1227	821907	822336	822122
ARS1227.5	888569	888810	888690
ARS1229	928051	928540	928296
ARS1231	947908	948358	948133
ARS1232	1007180	1007470	1007325
ARS1233	1013789	1014017	1013903
ARS1234	1023967	1024207	1024087
ARS1235	1059486	1059919	1.0597e+06
ARS1303	31687	31935	31811
ARS1304	39922	40355	40138.5
ARS1304.5	49645	50141	49893
ARS1304.7	73874	74373	74123.5
ARS1305	94216	94463	94339.5
ARS1307	137299	137548	137424
ARS1307.5	158846	159279	159062
ARS1308	183793	184037	183915
ARS1309	263062	263296	263179
ARS1310	286782	287067	286924
ARS1312	370976	371221	371098
ARS1315	432851	433347	433099
ARS1316	468177	468468	468322
ARS1319	503346	504087	503716
ARS1320	535595	535843	535719
ARS1322	554392	554750	554571
ARS1323	611273	611488	611380
ARS1324	634479	634714	634596
ARS1325	649307	649551	649429
ARS1326	688766	689221	688994
ARS1327	758222	758470	758346
ARS1328	772629	772878	772754
ARS1329	805116	805338	805227
ARS1330	815341	815567	815454
ARS1331.5	865288	865683	865486
ARS1331.7	878619	879115	878867
ARS1332	897804	898040	897922
ARS1405	28467	28699	28583
ARS1406	61597	61894	61745.5
ARS1407	89528	89802	89665
ARS1410	126488	126981	126734
ARS1411	169566	169804	169685
ARS1412	196055	196291	196173
ARS1413	250259	250506	250382
ARS1414	279875	280108	279992
ARS1415	321917	322210	322064
ARS1311.7	352509	352996	352752
ARS1417	412263	412493	412378
ARS1419	449343	449588	449466
ARS1420	498987	499232	499110
ARS1421	545966	546201	546084
ARS1422	561106	561384	561245
ARS1424	609458	609706	609582
ARS1426	635660	635901	635780
ARS1427	691482	691727	691604
ARS1428	713642	714136	713889
ARS1428.5	738550	738982	738766
ARS1506.5	35667	35903	35785
ARS1507	72636	72872	72754
ARS1508	85195	85444	85319.5
ARS1509	113843	114084	113964
ARS1509.3	128922	130182	129552
ARS1509.5	154972	155462	155217
ARS1510	166974	167220	167097
ARS1510.5	227481	228117	227799
ARS1511	277529	277778	277654
ARS1512	308969	309462	309216
ARS1513	337279	337528	337404
ARS1513.5	436732	436966	436849
ARS1514	489645	490129	489887
ARS1515.5	497144	497603	497374
ARS1515.7	520541	521040	520790
ARS1516	566409	566643	566526
ARS1517	600885	600960	600922
ARS1519	656632	656876	656754
ARS1520	681112	681611	681362
ARS1521	729739	729969	729854
ARS1523	766617	766862	766740
ARS1524	783344	783563	783454
ARS1525	854735	855228	854982
ARS1526	874190	874434	874312
ARS1528	908288	908537	908412
ARS1529	981454	981690	981572
ARS1529.5	1053490	1053901	1.0537e+06
ARS1601	6778	8439	7608.5
ARS1602	12290	13227	12758.5
ARS1604	42976	43212	43094
ARS1605	73038	73283	73160.5
ARS1607	116505	116765	116635
ARS1609	210467	211723	211095
ARS1614	289483	289704	289594
ARS1617	331678	332074	331876
ARS1618	384536	384784	384660
ARS1618.5	414032	416072	415052
ARS1619	418132	418359	418246
ARS1620.5	456557	456805	456681
ARS1621	511619	511940	511780
ARS1622	563822	564061	563942
ARS1622.5	565046	565289	565168
ARS1622.7	584037	584486	584262
ARS1623	633868	634117	633992
ARS1624	684383	684632	684508
ARS1625	695432	695681	695556
ARS1626	749094	749341	749218
ARS1626.5	776921	777152	777036
ARS1627	819153	819393	819273
ARS1628	842646	842894	842770
ARS1630	880854	881102	880978
ARS1631	932976	933223	933100

## Sheet: 191_WT_Fig1
	ARS315	ARS1021	ARS1330	ARS1529.5	ARS428	ARS731.5	ARS607	ARS922	ARS1114	ARS1103	ARS1511	ARS508	ARS1218	ARS913	ARS432.5	ARS202	ARS1211	ARS418	ARS523	ARS1213	ARS432	ARS815	ARS110	ARS1018	ARS305	ARS1107.5	ARS731	ARS108	ARS1019	ARS306	ARS131a	ARS208	ARS1002	ARS1113.5	ARS1332	ARS1014	ARS1008	ARS1310	ARS131n	ARS510	ARS1309	ARS201	ARS1422	ARS606	ARS1513.5	ARS1601	ARS720	ARS1303	ARS824
-5000	1.1	1.07	1.12	1.07	1.07	1.03	1.1	1.05	1.03	1.18	1.03	1.01	0.94	1.06	1.18	1.1	1.02	1.01	1.07	1.07	1.06	1.01	1.03	1.04	1.04	1.06	1.01	0.99	1.02	1.02	0.99	0.97	1.35	0.9	1.07	0.99	1.06	0.94	1.28	0.96	0.98	1.37	1.05	0.99	1.03	1.31	0.96	1.03	0.96
-4750	1.15	1.11	1.14	1.11	1.08	1.07	1.07	1.06	1.06	1.16	1.06	1.04	0.94	1.08	1.21	1.09	1.08	1.03	1.07	1.09	1.13	1.02	1.03	1.01	1.04	1.06	1.04	1.04	1.01	1.06	0.97	0.97	1.35	0.91	1.07	1	1.12	0.97	1.3	0.98	0.99	1.34	1.07	1.02	1.01	1.3	0.98	1.04	0.98
-4500	1.19	1.12	1.13	1.13	1.07	1.02	1.08	1.08	1.09	1.13	1.06	1.08	0.92	1.08	1.19	1.1	1.05	1.04	1.05	1.09	1.17	1.09	1.02	1.05	1.04	1.06	1.05	1.07	1.02	1.06	1.03	1.05	1.32	0.9	1.08	1.03	1.1	0.98	1.31	1.01	1.03	1.32	1.11	1.02	1.02	1.26	0.98	1.04	0.99
-4250	1.19	1.15	1.12	1.15	1.09	0.96	1.12	1.07	1.09	1.16	1.07	1.1	0.89	1.09	1.19	1.14	1.07	1.06	1.05	1.07	1.15	1.07	1.08	1.04	1.1	1.08	1.06	1.04	1.02	1.09	1.02	1.08	1.3	0.9	1.07	1.02	1.08	0.98	1.28	1.06	1.04	1.3	1.12	1.02	1.07	1.27	1	1.07	1
-4000	1.23	1.19	1.14	1.17	1.12	1.01	1.17	1.09	1.13	1.15	1.11	1.11	1.11	1.11	1.23	1.15	1.1	1.1	1.1	1.1	1.12	1.11	1.07	1.06	1.08	1.12	1.06	1.07	1.05	1.12	1.05	1.11	1.31	0.93	1.09	1.07	1.1	1.04	1.31	1.08	1.02	1.32	1.14	1.07	1.05	1.29	1.03	1.09	1
-3750	1.25	1.18	1.16	1.18	1.14	1.18	1.19	1.12	1.12	1.15	1.16	1.14	1.23	1.15	1.23	1.2	1.13	1.12	1.11	1.12	1.11	1.13	1.12	1.12	1.1	1.1	1.06	1.08	1.05	1.12	1.07	1.1	1.32	0.94	1.11	1.1	1.1	1.03	1.26	1.08	1.02	1.31	1.16	1.05	1.04	1.3	1.07	1.09	0.98
-3500	1.28	1.21	1.19	1.21	1.15	1.16	1.17	1.18	1.11	1.21	1.19	1.16	1.24	1.18	1.19	1.18	1.16	1.14	1.08	1.11	1.12	1.14	1.12	1.13	1.1	1.1	1.08	1.09	1.08	1.09	1.04	1.12	1.29	0.95	1.17	1.12	1.07	1.05	1.28	1.12	1.04	1.27	1.19	1.05	1.1	1.3	1.13	1.1	1.03
-3250	1.31	1.26	1.23	1.25	1.2	1.19	1.18	1.18	1.13	1.21	1.17	1.16	1.27	1.2	1.2	1.19	1.17	1.15	1.09	1.14	1.07	1.14	1.16	1.13	1.12	1.16	1.1	1.09	1.14	1.12	0.98	1.11	1.32	0.96	1.16	1.11	1.09	1.11	1.22	1.12	1.06	1.28	1.22	1.09	1.11	1.34	1.12	1.1	1.07
-3000	1.25	1.27	1.24	1.27	1.24	1.22	1.23	1.19	1.15	1.23	1.15	1.18	1.25	1.21	1.22	1.24	1.17	1.13	1.11	1.14	1.09	1.17	1.16	1.11	1.17	1.18	1.14	1.1	1.17	1.16	1.07	1.13	1.3	0.98	1.17	1.1	1.12	1.13	1.22	1.14	1.11	1.24	1.15	1.11	1.11	1.3	1.09	1.11	1.03
-2750	1.31	1.28	1.27	1.28	1.24	1.25	1.25	1.23	1.21	1.23	1.2	1.25	1.27	1.23	1.24	1.22	1.2	1.16	1.09	1.17	1.12	1.17	1.17	1.16	1.2	1.19	1.15	1.12	1.18	1.19	1.06	1.19	1.3	0.99	1.16	1.12	1.14	1.15	1.23	1.16	1.12	1.22	1.16	1.15	1.11	1.3	1.09	1.11	1.01
-2500	1.34	1.29	1.37	1.3	1.28	1.28	1.28	1.24	1.21	1.23	1.24	1.27	1.26	1.26	1.25	1.25	1.25	1.16	1.1	1.21	1.12	1.19	1.18	1.2	1.22	1.15	1.16	1.18	1.17	1.18	1.04	1.21	1.29	1	1.13	1.16	1.14	1.12	1.27	1.18	1.14	1.22	1.22	1.12	1.14	1.28	1.08	1.13	1.02
-2250	1.35	1.29	1.37	1.27	1.28	1.27	1.3	1.28	1.23	1.24	1.23	1.3	1.27	1.24	1.21	1.23	1.23	1.24	1.16	1.23	1.18	1.18	1.22	1.2	1.22	1.15	1.2	1.17	1.16	1.21	1.06	1.19	1.26	1.03	1.18	1.17	1.1	1.14	1.24	1.13	1.18	1.24	1.26	1.14	1.18	1.28	1.11	1.12	1
-2000	1.35	1.32	1.33	1.26	1.32	1.31	1.28	1.27	1.26	1.25	1.32	1.28	1.31	1.27	1.25	1.23	1.25	1.22	1.13	1.22	1.22	1.2	1.21	1.18	1.21	1.18	1.21	1.16	1.17	1.19	1.07	1.24	1.25	1.03	1.18	1.18	1.11	1.16	1.23	1.14	1.24	1.26	1.29	1.17	1.17	1.26	1.15	1.13	1.05
-1750	1.36	1.34	1.35	1.31	1.33	1.32	1.28	1.26	1.27	1.25	1.35	1.32	1.33	1.29	1.22	1.23	1.25	1.21	1.13	1.26	1.21	1.24	1.23	1.22	1.25	1.2	1.25	1.2	1.2	1.24	1.08	1.24	1.2	1.06	1.18	1.21	1.14	1.22	1.26	1.18	1.2	1.25	1.24	1.19	1.18	1.29	1.17	1.16	1.05
-1500	1.4	1.38	1.35	1.38	1.34	1.32	1.29	1.32	1.27	1.23	1.32	1.34	1.26	1.33	1.23	1.25	1.27	1.21	1.14	1.26	1.2	1.26	1.28	1.24	1.28	1.19	1.26	1.21	1.2	1.25	1.09	1.23	1.21	1.09	1.22	1.2	1.14	1.21	1.26	1.19	1.23	1.29	1.27	1.21	1.2	1.25	1.14	1.18	1.05
-1250	1.4	1.43	1.38	1.38	1.38	1.35	1.34	1.33	1.33	1.28	1.37	1.29	1.31	1.31	1.23	1.25	1.25	1.23	1.13	1.28	1.21	1.27	1.28	1.27	1.28	1.22	1.26	1.23	1.23	1.25	1.08	1.24	1.21	1.09	1.22	1.19	1.11	1.22	1.22	1.24	1.21	1.24	1.27	1.24	1.19	1.17	1.17	1.2	1.04
-1000	1.38	1.41	1.41	1.39	1.38	1.4	1.37	1.32	1.37	1.27	1.34	1.35	1.33	1.29	1.25	1.28	1.29	1.24	1.14	1.31	1.23	1.28	1.27	1.26	1.29	1.2	1.3	1.26	1.21	1.25	1.09	1.27	1.19	1.13	1.23	1.26	1.11	1.23	1.21	1.26	1.23	1.18	1.32	1.21	1.17	1.07	1.21	1.17	1.03
-750	1.36	1.4	1.45	1.36	1.36	1.36	1.34	1.32	1.37	1.31	1.36	1.33	1.37	1.3	1.27	1.3	1.35	1.27	1.19	1.28	1.25	1.35	1.29	1.28	1.27	1.23	1.34	1.29	1.26	1.27	1.11	1.26	1.19	1.12	1.2	1.24	1.09	1.3	1.17	1.28	1.25	1.13	1.34	1.22	1.19	1.06	1.23	1.17	1.01
-500	1.44	1.4	1.45	1.38	1.33	1.37	1.38	1.31	1.37	1.3	1.33	1.37	1.35	1.31	1.31	1.31	1.31	1.25	1.21	1.28	1.24	1.3	1.32	1.26	1.31	1.24	1.3	1.27	1.28	1.26	1.14	1.28	1.16	1.11	1.23	1.26	1.15	1.26	1.16	1.24	1.25	1.1	1.38	1.23	1.21	1.1	1.25	1.18	1.05
-250	1.38	1.38	1.41	1.38	1.36	1.37	1.41	1.35	1.38	1.27	1.33	1.35	1.34	1.36	1.3	1.32	1.3	1.26	1.18	1.35	1.23	1.27	1.31	1.26	1.31	1.24	1.36	1.27	1.28	1.25	1.14	1.3	1.12	1.13	1.24	1.23	1.19	1.26	1.15	1.21	1.27	1.14	1.33	1.28	1.23	1.09	1.18	1.2	1.04
Midpoint	1.4	1.4	1.39	1.37	1.38	1.39	1.37	1.37	1.36	1.31	1.32	1.36	1.41	1.33	1.33	1.29	1.3	1.31	1.19	1.34	1.26	1.24	1.33	1.28	1.27	1.26	1.32	1.26	1.29	1.28	1.13	1.27	1.09	1.15	1.26	1.29	1.2	1.28	1.11	1.29	1.29	1.13	1.32	1.29	1.23	1.09	1.23	1.2	1.07
250	1.37	1.41	1.44	1.36	1.44	1.38	1.39	1.32	1.36	1.32	1.33	1.32	1.4	1.34	1.31	1.27	1.31	1.38	1.16	1.29	1.28	1.25	1.3	1.31	1.27	1.27	1.31	1.29	1.29	1.28	1.11	1.3	1.13	1.21	1.24	1.26	1.23	1.29	1.1	1.28	1.26	1.12	1.31	1.22	1.22	1.09	1.23	1.19	1.04
500	1.4	1.46	1.4	1.42	1.39	1.38	1.38	1.31	1.32	1.31	1.35	1.35	1.34	1.28	1.25	1.31	1.28	1.37	1.15	1.23	1.21	1.2	1.25	1.28	1.27	1.21	1.27	1.33	1.28	1.27	1.1	1.31	1.14	1.21	1.22	1.29	1.26	1.3	1.1	1.27	1.22	1.12	1.3	1.24	1.14	1.02	1.23	1.17	1.08
750	1.43	1.5	1.35	1.4	1.37	1.4	1.31	1.32	1.3	1.31	1.38	1.33	1.34	1.3	1.23	1.35	1.3	1.32	1.18	1.22	1.17	1.24	1.25	1.24	1.29	1.23	1.3	1.29	1.27	1.29	1.18	1.29	1.09	1.23	1.2	1.25	1.24	1.25	1.08	1.3	1.23	1.14	1.26	1.21	1.17	1.01	1.17	1.2	1.05
1000	1.4	1.44	1.37	1.37	1.41	1.36	1.35	1.33	1.31	1.28	1.35	1.32	1.35	1.28	1.27	1.26	1.28	1.31	1.22	1.26	1.13	1.22	1.25	1.25	1.24	1.22	1.32	1.24	1.25	1.23	1.22	1.26	1.09	1.26	1.2	1.23	1.26	1.24	1.08	1.27	1.25	1.13	1.15	1.21	1.14	1.02	1.19	1.2	1.19
1250	1.36	1.4	1.31	1.37	1.37	1.35	1.36	1.3	1.3	1.25	1.31	1.32	1.33	1.29	1.22	1.25	1.26	1.33	1.24	1.28	1.11	1.25	1.2	1.31	1.27	1.25	1.28	1.24	1.24	1.18	1.25	1.22	1.07	1.27	1.22	1.29	1.25	1.24	1.05	1.28	1.24	1.08	1.01	1.23	1.14	1.06	1.2	1.16	1.21
1500	1.33	1.37	1.36	1.37	1.34	1.37	1.32	1.31	1.29	1.27	1.28	1.3	1.32	1.3	1.24	1.2	1.23	1.28	1.26	1.25	1.15	1.3	1.2	1.26	1.26	1.22	1.25	1.25	1.25	1.21	1.27	1.23	1.08	1.27	1.28	1.26	1.25	1.23	1.05	1.25	1.21	1.06	0.98	1.18	1.16	1.05	1.22	1.15	1.26
1750	1.31	1.38	1.36	1.39	1.32	1.36	1.33	1.32	1.29	1.27	1.26	1.31	1.31	1.25	1.25	1.19	1.27	1.25	1.27	1.23	1.18	1.23	1.24	1.24	1.22	1.23	1.21	1.25	1.22	1.22	1.26	1.26	1.05	1.33	1.19	1.26	1.25	1.22	1.05	1.21	1.21	1.07	0.97	1.22	1.14	1.01	1.16	1.13	1.28
2000	1.36	1.43	1.34	1.33	1.34	1.3	1.28	1.31	1.29	1.23	1.27	1.3	1.27	1.27	1.22	1.21	1.22	1.25	1.31	1.19	1.21	1.19	1.22	1.21	1.2	1.26	1.2	1.22	1.16	1.19	1.29	1.19	1.05	1.37	1.15	1.21	1.2	1.21	1.07	1.19	1.17	1.04	1.01	1.2	1.15	1.01	1.17	1.15	1.25
2250	1.34	1.4	1.3	1.34	1.32	1.3	1.28	1.29	1.25	1.21	1.22	1.28	1.23	1.25	1.18	1.19	1.22	1.22	1.32	1.21	1.19	1.17	1.21	1.24	1.18	1.23	1.22	1.19	1.23	1.19	1.3	1.16	1.07	1.37	1.17	1.17	1.18	1.17	1.09	1.18	1.17	1.01	1.03	1.17	1.16	0.99	1.18	1.11	1.24
2500	1.32	1.39	1.3	1.33	1.32	1.29	1.27	1.27	1.26	1.22	1.22	1.27	1.22	1.26	1.18	1.18	1.21	1.21	1.29	1.21	1.19	1.17	1.21	1.24	1.23	1.23	1.17	1.2	1.22	1.13	1.3	1.19	1.07	1.37	1.18	1.15	1.2	1.14	1.04	1.13	1.15	0.99	0.96	1.17	1.15	0.98	1.17	1.11	1.23
2750	1.33	1.29	1.25	1.28	1.31	1.28	1.2	1.26	1.26	1.26	1.23	1.23	1.23	1.23	1.17	1.16	1.21	1.2	1.28	1.19	1.23	1.17	1.18	1.2	1.17	1.22	1.14	1.19	1.2	1.11	1.29	1.14	1.05	1.38	1.16	1.11	1.19	1.16	1.06	1.13	1.11	0.96	0.96	1.14	1.11	0.96	1.14	1.11	1.21
3000	1.33	1.29	1.21	1.24	1.26	1.27	1.15	1.22	1.2	1.24	1.21	1.16	1.2	1.2	1.12	1.19	1.19	1.18	1.29	1.2	1.23	1.18	1.16	1.18	1.14	1.16	1.12	1.17	1.18	1.09	1.3	1.13	1.02	1.36	1.13	1.12	1.16	1.18	1.05	1.14	1.11	0.98	0.98	1.13	1.13	0.98	1.13	1.08	1.25
3250	1.3	1.27	1.21	1.23	1.26	1.27	1.16	1.16	1.18	1.21	1.17	1.16	1.15	1.18	1.12	1.17	1.13	1.14	1.3	1.17	1.19	1.19	1.16	1.14	1.14	1.17	1.09	1.15	1.16	1.12	1.28	1.13	1.02	1.36	1.09	1.1	1.16	1.16	1.05	1.11	1.11	1.01	0.99	1.07	1.16	0.98	1.1	1.11	1.25
3500	1.28	1.23	1.19	1.24	1.24	1.26	1.14	1.16	1.18	1.19	1.17	1.15	1.19	1.16	1.14	1.19	1.13	1.13	1.28	1.14	1.2	1.12	1.1	1.1	1.13	1.18	1.1	1.12	1.12	1.11	1.3	1.1	1.07	1.32	1.09	1.12	1.11	1.12	1.01	1.07	1.08	0.99	0.99	1.1	1.15	0.98	1.14	1.12	1.24
3750	1.24	1.22	1.18	1.2	1.38	1.22	1.12	1.15	1.15	1.17	1.13	1.12	1.18	1.14	1.13	1.13	1.11	1.13	1.27	1.1	1.22	1.14	1.11	1.09	1.11	1.14	1.12	1.09	1.09	1.1	1.29	1	1.05	1.3	1.1	1.11	1.11	1.08	1	1.04	1.08	0.96	0.95	1.04	1.09	1.02	1.09	1.08	1.27
4000	1.21	1.2	1.21	1.19	1.14	1.22	1.13	1.17	1.14	1.14	1.16	1.09	1.11	1.14	1.07	1.07	1.11	1.12	1.29	1.09	1.24	1.11	1.07	1.11	1.03	1.11	1.06	1.07	1.08	1.09	1.3	0.99	1.03	1.31	1.08	1.07	1.09	1.07	1.01	1.02	1.04	0.94	0.99	1.01	1.06	1.05	1.1	1.07	1.3
4250	1.22	1.16	1.16	1.17	1.13	1.19	1.11	1.15	1.14	1.13	1.14	1.08	1.08	1.11	1.05	1.07	1.11	1.09	1.26	1.09	1.25	1.08	1.1	1.1	1.04	1.09	1.08	1.09	1.08	1.06	1.33	0.99	1.01	1.3	1.05	1.06	1.12	1.09	1.02	1	1.06	0.93	0.97	1	1.05	1.03	1.03	1.07	1.27
4500	1.19	1.12	1.18	1.14	1.13	1.19	1.09	1.1	1.15	1.12	1.09	1.07	1.06	1.09	1.05	1.04	1.07	1.1	1.23	1.09	1.21	1.07	1.07	1.06	1.02	1.1	1.07	1.06	1.06	1.04	1.3	0.97	1.01	1.29	1.06	1.06	1.11	1.05	1.03	1	1.08	0.96	0.96	0.98	1.05	1	1.01	1.07	1.27
4750	1.15	1.13	1.16	1.16	1.13	1.17	1.06	1.1	1.16	1.12	1.1	1.09	1.09	1.08	1.03	1.11	1.07	1.08	1.27	1.06	1.25	1.06	1.04	1.06	1	1.12	1.03	1.08	1.03	1	1.27	1	0.98	1.29	1.05	1.05	1.08	1.02	0.99	0.96	1.04	0.95	0.95	0.93	1.02	0.95	1	1.05	1.3
5000	1.13	1.09	1.12	1.13	1.1	1.14	1.04	1.09	1.14	1.13	1.05	1.06	1.09	1.09	1.05	1.08	1.03	1.08	1.28	1.04	1.22	1.09	1.03	1.03	0.99	1.08	1	1.02	1.02	0.95	1.26	1.02	1	1.29	1.02	1.06	1.07	0.96	0.98	0.93	1	0.93	0.96	0.91	1.03	0.99	1.01	1.02	1.29
[truncated: 350 more columns]

## Sheet: 157_rif1_Fig1
	ARS1021	ARS922	ARS1529.5	ARS508	ARS1511	ARS731.5	ARS306	ARS1330	ARS305	ARS607	ARS428	ARS1103	ARS1014	ARS315	ARS110	ARS202	ARS432	ARS820	ARS1303	ARS909	ARS1019	ARS1018	ARS516	ARS1218	ARS415	ARS824	ARS511	ARS1332	ARS1114	ARS1310	ARS1008	ARS418	ARS1223	ARS1510	ARS131n	ARS1107.5	ARS1623	ARS523	ARS437	ARS1422	ARS1601	ARS131a	ARS707	ARS201	ARS432.5	ARS913	ARS1002	ARS1614	ARS1513.5
-5000	0.95	0.96	0.99	0.97	0.95	0.93	1.02	0.91	1.03	0.95	1	0.95	1.04	0.95	0.97	0.89	1.09	0.97	0.98	1.01	0.88	0.94	1	1	1	0.97	0.94	0.96	0.94	0.97	1.01	0.96	1.05	0.93	1.32	0.99	1.02	0.88	1.05	0.98	1.3	0.97	0.99	1.28	1.14	1.04	1.36	1.05	1.01
-4750	0.92	1.02	1.03	1.01	1.01	0.98	0.99	1.02	1.02	0.94	0.99	1.02	1.03	0.99	0.98	0.99	1.14	0.95	1.01	1.07	0.88	0.99	1.01	1.01	1	0.99	0.96	0.98	0.99	0.93	1.05	1	1.09	0.96	1.33	0.93	1.05	1.01	0.99	0.98	1.26	1.03	1.03	1.32	1.16	1.04	1.32	1.1	0.98
-4500	1.05	0.96	1.01	1.03	0.99	0.92	1	1.1	1.1	0.96	1	1.03	1.03	1.01	0.96	1.07	1.16	1.03	1.05	1.06	0.96	1.09	1.02	0.95	0.97	0.92	1.01	1.02	1.02	0.92	1.01	0.98	1.02	0.99	1.32	0.96	1.05	1.05	0.98	0.99	1.23	1.03	1.04	1.33	1.15	1.04	1.28	1.09	0.98
-4250	1.11	1.02	1.03	1.01	1.06	0.94	1.03	1.03	1.02	1.04	1	1.04	0.98	1.08	0.93	1.06	1.2	1.11	1.07	1.08	0.98	1.04	1.08	0.93	0.97	0.98	0.92	1.11	0.99	0.99	1.08	0.99	1.05	1.04	1.27	1	1.09	0.97	1.05	0.99	1.25	1.04	1.01	1.36	1.18	1.01	1.27	1.07	0.99
-4000	1.12	1.11	1.04	1.12	1.15	0.98	1.05	1.04	1.04	1.07	1.04	1.08	1.08	1.12	0.99	1.05	1.2	1.05	0.99	1.02	1.02	0.96	1.09	1.04	0.97	1.02	0.97	1.06	1.01	0.97	1.05	1.05	1.08	1.05	1.31	0.97	1.03	0.96	1.07	1.02	1.2	1.01	0.99	1.38	1.16	1.02	1.21	1.02	0.96
-3750	1.13	1.09	1.1	1.16	1.13	0.99	1.06	1.05	1.07	1.02	1.09	1.06	1.04	1.13	1.09	1.08	1.14	1.14	1.06	1.02	1.02	1.04	1.09	1.01	1.05	1.05	0.99	1.08	0.96	1.07	1.04	1.04	1.05	1.05	1.3	1	1.05	0.98	1.04	1.13	1.23	1.07	1.07	1.27	1.16	1.04	1.2	1.04	1
-3500	1.19	1.11	1.11	1.15	1.14	1.12	1.12	1.07	1.15	1.05	1.1	1.11	1.05	1.15	1.19	1.15	1.04	1.19	1.08	1.05	1.02	1.07	1.05	1.03	1.11	1.12	0.95	1.14	0.98	1.05	1.07	1.04	1.05	1.02	1.3	1.01	1.09	1.01	1.04	1.24	1.22	1.15	0.97	1.29	1.13	1.11	1.22	1.06	0.99
-3250	1.16	1.21	1.11	1.16	1.2	1.16	1.13	1.18	1.2	1.15	1.14	1.13	1.06	1.21	1.2	1.17	1.05	1.16	1.17	1.08	1.03	1.1	1.11	1.04	1.07	1.11	1.03	1.13	0.98	1.04	1.16	0.99	1.11	1.02	1.28	1	1.1	1.05	1.03	1.1	1.2	1.13	1.03	1.28	1.11	1.14	1.23	1.09	0.99
-3000	1.17	1.27	1.17	1.18	1.23	1.32	1.3	1.2	1.21	1.2	1.11	1.26	1.11	1.18	1.18	1.19	1.04	1.13	1.2	1.08	1.09	1.08	1.17	1.16	1.18	1.13	1.16	1.16	0.96	1.06	1.17	1.09	1.09	1.06	1.27	1.05	1.03	1.06	0.99	1.17	1.19	1.13	1.13	1.25	1.09	1.12	1.24	1.11	1.06
-2750	1.22	1.27	1.23	1.32	1.27	1.29	1.32	1.25	1.22	1.31	1.16	1.23	1.21	1.19	1.26	1.19	1.03	1.17	1.22	1.15	1.21	1.11	1.19	1.18	1.14	1.08	1.21	1.22	1.05	1.09	1.07	1.12	1.14	1.13	1.2	1.06	1	1.06	1.03	1.24	1.17	1.02	1.16	1.18	1.06	1.1	1.24	1.09	1.09
-2500	1.23	1.35	1.25	1.35	1.28	1.27	1.32	1.3	1.31	1.32	1.21	1.27	1.23	1.2	1.24	1.16	1.11	1.18	1.15	1.17	1.19	1.1	1.23	1.22	1.14	1.01	1.19	1.26	1.13	1.15	1.09	1.11	1.17	1.1	1.27	1.16	1.1	1.09	1.07	1.21	1.19	1.01	1.16	1.25	1.1	1.08	1.19	1.11	1.15
-2250	1.2	1.36	1.24	1.45	1.32	1.3	1.34	1.25	1.41	1.34	1.25	1.21	1.25	1.18	1.25	1.25	1.12	1.17	1.19	1.21	1.16	1.07	1.21	1.23	1.18	1.02	1.23	1.25	1.16	1.19	1.03	1.16	1.22	1.07	1.2	1.19	1.19	1.18	1.08	1.19	1.26	1.06	1.2	1.23	1.08	1.18	1.19	1.12	1.24
-2000	1.26	1.39	1.3	1.42	1.29	1.35	1.37	1.35	1.32	1.34	1.38	1.19	1.32	1.28	1.32	1.25	1.13	1.14	1.17	1.19	1.21	1.09	1.22	1.21	1.16	1.02	1.25	1.16	1.24	1.16	1.03	1.28	1.28	1.17	1.2	1.16	1.15	1.11	1.06	1.26	1.26	1.04	1.13	1.19	1.13	1.14	1.23	1.18	1.1
-1750	1.34	1.42	1.38	1.39	1.36	1.43	1.34	1.41	1.28	1.31	1.32	1.27	1.35	1.32	1.35	1.26	1.2	1.14	1.27	1.22	1.23	1.13	1.25	1.26	1.24	1.03	1.18	1.22	1.16	1.21	1.12	1.19	1.3	1.12	1.21	1.14	1.17	1.2	1.05	1.29	1.21	1.04	1.13	1.17	1.09	1.16	1.2	1.23	1.15
-1500	1.5	1.45	1.43	1.42	1.37	1.42	1.35	1.46	1.4	1.41	1.18	1.31	1.43	1.24	1.33	1.27	1.25	1.3	1.3	1.25	1.24	1.22	1.27	1.29	1.36	1.09	1.18	1.26	1.21	1.23	1.16	1.16	1.21	1.2	1.2	1.17	1.18	1.17	1.05	1.25	1.22	1.05	1.14	1.18	1.12	1.19	1.17	1.27	1.07
-1250	1.6	1.48	1.48	1.45	1.4	1.4	1.35	1.32	1.42	1.41	1.28	1.29	1.39	1.26	1.32	1.32	1.41	1.32	1.24	1.31	1.24	1.31	1.28	1.35	1.22	1.11	1.19	1.32	1.29	1.22	1.23	1.22	1.19	1.25	1.19	1.22	1.21	1.12	1	1.34	1.19	1.04	1.18	1.11	1.13	1.23	1.14	1.17	1.12
-1000	1.58	1.46	1.49	1.44	1.42	1.46	1.37	1.34	1.46	1.41	1.41	1.37	1.32	1.26	1.41	1.35	1.41	1.25	1.25	1.32	1.28	1.32	1.21	1.39	1.3	1.08	1.23	1.22	1.2	1.32	1.18	1.31	1.16	1.25	1.17	1.28	1.21	1.13	0.98	1.33	1.08	1.02	1.21	1.14	1.2	1.27	1.02	1.13	1.25
-750	1.56	1.46	1.54	1.5	1.46	1.38	1.42	1.42	1.39	1.45	1.44	1.35	1.33	1.27	1.37	1.26	1.33	1.32	1.31	1.35	1.32	1.31	1.25	1.43	1.26	1.12	1.22	1.21	1.27	1.4	1.2	1.32	1.17	1.21	1.17	1.36	1.14	1.13	0.97	1.42	1.09	1.03	1.19	1.15	1.19	1.29	1.04	1.13	1.22
-500	1.55	1.47	1.42	1.5	1.45	1.4	1.41	1.33	1.34	1.47	1.47	1.34	1.29	1.36	1.26	1.28	1.26	1.37	1.27	1.34	1.35	1.24	1.32	1.36	1.24	1.17	1.27	1.25	1.26	1.26	1.22	1.29	1.24	1.21	1.11	1.27	1.18	1.1	1.12	1.26	1.04	1.03	1.16	1.04	1.17	1.23	1.12	1.18	1.18
-250	1.5	1.46	1.53	1.43	1.42	1.35	1.42	1.38	1.35	1.48	1.44	1.28	1.28	1.33	1.22	1.31	1.23	1.39	1.26	1.27	1.35	1.37	1.32	1.33	1.23	1.12	1.28	1.27	1.22	1.33	1.15	1.3	1.15	1.15	1.06	1.27	1.13	1.07	1.1	1.34	0.97	1.01	1.08	1.01	1.18	1.2	1.09	1.18	1.19
Midpoint	1.53	1.42	1.52	1.34	1.44	1.29	1.43	1.42	1.28	1.49	1.39	1.31	1.34	1.26	1.23	1.45	1.23	1.26	1.3	1.26	1.32	1.36	1.3	1.32	1.19	1.07	1.2	1.21	1.29	1.39	1.11	1.21	1.14	1.2	1.05	1.19	1.12	1.05	1.04	1.3	1.01	0.95	1.13	1.05	1.18	1.15	1.09	1.15	1.15
250	1.48	1.5	1.43	1.44	1.46	1.21	1.43	1.35	1.26	1.52	1.43	1.4	1.29	1.3	1.39	1.39	1.41	1.25	1.32	1.3	1.24	1.22	1.28	1.28	1.21	1.09	1.31	1.17	1.34	1.31	1.18	1.31	1.22	1.29	1.06	1.22	1.15	1.01	1.03	1.23	1.04	1	1.28	1.07	1.26	1.21	1.06	1.22	1.19
500	1.58	1.46	1.49	1.5	1.58	1.26	1.48	1.33	1.37	1.45	1.3	1.42	1.26	1.34	1.32	1.32	1.3	1.29	1.32	1.32	1.28	1.25	1.28	1.2	1.16	1.11	1.25	1.31	1.19	1.21	1.3	1.27	1.31	1.24	1.03	1.29	1.22	1.05	1.1	1.29	1.13	0.98	1.36	1.05	1.21	1.31	1.04	1.26	1.25
750	1.59	1.47	1.43	1.38	1.52	1.31	1.49	1.29	1.46	1.35	1.41	1.32	1.45	1.38	1.33	1.26	1.22	1.24	1.34	1.3	1.35	1.31	1.16	1.25	1.19	1.26	1.26	1.27	1.26	1.23	1.31	1.26	1.3	1.29	1.03	1.28	1.27	1.1	1.06	1.22	1.12	1.12	1.33	1.09	1.2	1.23	1.07	1.27	1.24
1000	1.51	1.48	1.44	1.43	1.48	1.38	1.44	1.37	1.43	1.39	1.26	1.25	1.45	1.32	1.32	1.26	1.19	1.24	1.3	1.31	1.39	1.2	1.21	1.27	1.16	1.22	1.16	1.29	1.28	1.26	1.26	1.18	1.29	1.27	1.04	1.25	1.19	1.05	0.95	1.06	1.11	1.12	1.25	1.04	1.2	1.18	1.06	1.21	1.31
1250	1.5	1.46	1.45	1.47	1.35	1.42	1.45	1.32	1.46	1.39	1.31	1.31	1.42	1.28	1.37	1.21	1.16	1.27	1.27	1.23	1.32	1.29	1.21	1.21	1.28	1.13	1.23	1.28	1.22	1.26	1.27	1.21	1.26	1.23	1.06	1.26	1.21	1.08	1.01	0.97	1.11	1.23	1.23	1.05	1.14	1.15	1.1	1.13	1.31
1500	1.49	1.52	1.42	1.42	1.3	1.39	1.38	1.35	1.43	1.32	1.32	1.37	1.39	1.31	1.35	1.24	1.18	1.24	1.2	1.24	1.34	1.27	1.17	1.18	1.25	1.13	1.34	1.2	1.28	1.24	1.28	1.29	1.17	1.21	1.05	1.3	1.17	1.18	1.06	0.98	1.07	1.23	1.12	1.06	1.17	1.14	1.08	1.14	1.08
1750	1.52	1.51	1.35	1.34	1.36	1.47	1.34	1.31	1.35	1.28	1.34	1.32	1.3	1.24	1.24	1.26	1.14	1.28	1.2	1.23	1.29	1.29	1.19	1.15	1.16	1.16	1.24	1.21	1.25	1.27	1.31	1.28	1.12	1.2	1.09	1.27	1.19	1.2	1.03	1	1.07	1.21	1.21	1.06	1.19	1.13	1.07	1.1	1.1
2000	1.42	1.48	1.29	1.33	1.38	1.45	1.33	1.32	1.28	1.31	1.34	1.3	1.31	1.22	1.2	1.27	1.16	1.24	1.2	1.18	1.28	1.34	1.19	1.15	1.2	1.26	1.12	1.16	1.28	1.17	1.26	1.19	1.16	1.22	1.02	1.19	1.21	1.17	1.03	1.05	1.12	1.18	1.15	1.11	1.2	1.13	1.02	1.12	1.19
2250	1.45	1.33	1.25	1.28	1.3	1.38	1.29	1.26	1.25	1.26	1.26	1.3	1.27	1.18	1.34	1.21	1.15	1.18	1.22	1.21	1.18	1.33	1.2	1.14	1.06	1.28	1.12	1.08	1.3	1.21	1.23	1.18	1.18	1.27	0.99	1.21	1.2	1.19	1.11	1.1	1.12	1.17	1.13	1.07	1.11	1.17	0.95	1.06	1.19
2500	1.39	1.37	1.29	1.2	1.25	1.31	1.28	1.2	1.13	1.22	1.28	1.24	1.2	1.27	1.28	1.13	1.18	1.21	1.21	1.2	1.23	1.23	1.19	1.03	1.24	1.29	1.21	1.1	1.15	1.16	1.2	1.22	1.16	1.17	1.01	1.19	1.17	1.25	1.11	0.97	1.08	1.2	1.17	0.98	1.08	1.12	0.99	1.08	1.18
2750	1.36	1.39	1.26	1.21	1.19	1.27	1.19	1.24	1.4	1.17	1.27	1.19	1.04	1.21	1.2	1.09	1.16	1.19	1.15	1.16	1.19	1.18	1.22	1.09	1.24	1.21	1.21	1.08	1.1	1.15	1.16	1.11	1.22	1.17	1.02	1.08	1.17	1.24	1.1	0.97	0.99	1.28	1.11	0.97	1.11	1.01	0.98	1.04	1.14
3000	1.3	1.35	1.24	1.21	1.15	1.18	1.15	1.2	1.22	1.18	1.3	1.13	1.16	1.15	1.24	1.15	1.16	1.2	1.12	1.06	1.21	1.18	1.14	1.15	1.26	1.22	1.12	1.02	1.19	1.11	1.08	1.09	1.15	1.07	1.11	1.15	1.16	1.26	1.09	1.01	0.99	1.2	1.06	0.98	1.15	1	0.95	1.07	1.11
3250	1.23	1.25	1.25	1.16	1.12	1.21	1.1	1.21	1.12	1.17	1.14	1.16	1.16	1.2	1.18	1.13	1.13	1.16	1.13	1.03	1.13	1.15	1.06	1.12	1.19	1.2	1.13	1.07	1.14	1.04	1.17	1.13	1.07	1.1	1.06	1.08	1.09	1.26	1.08	1.04	1.02	1.26	1.12	0.98	1.12	1.01	1.01	1.06	1.07
3500	1.28	1.22	1.25	1.14	1.1	1.27	1.09	1.19	1.08	1.05	1.15	1.19	1.15	1.15	1.08	1.05	1.11	1.1	1.07	1.11	1	1.06	1.11	1.06	1.11	1.27	1.11	1.06	1.12	1.07	1.15	1.07	0.99	1.1	1.02	1.11	1.04	1.23	1.04	1.04	1.02	1.29	1.09	0.99	0.99	1	1.08	1.1	1.12
3750	1.22	1.18	1.2	1.1	1.08	1.12	1.05	1.11	1.03	0.95	0.99	1.17	1.07	1.13	1.02	1	1.09	1.02	1.07	1.11	1.04	1.02	1.07	1.07	1.1	1.3	1.08	1.01	1.08	1.02	1.09	1.04	0.97	1.02	1.07	1.09	1.05	1.23	2.66	1.05	0.99	1.23	1.08	0.94	0.94	1.01	1.02	1.09	1.1
4000	1.21	1.14	1.1	1.04	1.07	1.06	1.06	1.08	1.03	0.94	1.03	1.11	1.04	1.16	1.04	1.04	1.06	1.02	1.01	1.09	1.03	1.07	0.99	0.96	1.08	1.36	1.08	1	1.11	1.04	1.13	0.96	1	1.1	1.06	1.03	1.11	1.25	2.72	1.04	1.04	1.25	1.05	0.92	0.95	1.06	1.08	1.07	1.09
4250	1.14	1.07	1.06	0.98	0.97	1.06	0.99	1.07	0.93	1.01	1.04	1.08	1.02	1.11	1.03	1.04	1.1	1.01	1	1.07	1.08	1.08	1.06	0.95	1.04	1.31	1.08	0.98	1.01	1.01	1.07	0.96	0.98	1.12	1.04	0.95	1.11	1.3	1.03	1.01	1.02	1.28	0.96	1.01	0.96	1.06	1.03	1	1.09
4500	1	1.03	1	0.99	0.97	1.07	0.96	1.1	0.97	0.97	1.06	1.08	1.02	1.11	1.01	1.04	1.08	1.03	1.05	1	1.07	1.04	1.01	1.03	1.01	1.3	1.09	0.93	1.14	1	1	0.98	1.02	1.06	1	0.99	1.07	1.2	1.06	1.02	1.02	1.26	1.07	1.01	0.99	1.02	0.98	1.01	1
4750	1.06	0.96	1.02	1	0.97	1.06	0.97	1.13	1	0.93	1.04	1.03	0.99	1.08	0.91	0.97	1.13	1	1.03	1.03	1.01	1.05	1.04	1	0.96	1.27	1.02	0.99	1.01	1	0.98	1.03	0.98	1.05	0.97	1.03	1.08	1.26	1.06	0.97	1.01	1.27	1.02	1.01	0.95	1.05	1	1.04	0.92
5000	1.04	0.98	1.02	0.96	0.94	1.03	0.98	1.12	0.95	0.93	1.01	1.01	1.02	1.01	0.91	0.95	1.09	1	1.02	1	0.96	1.01	1.02	1.01	1.01	1.29	1.02	1.03	0.96	1.01	0.98	0.96	0.96	1.08	0.95	1	1.09	1.31	0.95	1.01	1.1	1.31	0.98	0.98	0.96	0.99	1.09	1.01	0.94
[truncated: 349 more columns]

## Sheet: 193_pp1bs_Fig1
	ARS731.5	ARS1215	ARS1217	ARS1223	ARS1103	ARS1021	ARS1218	ARS428	ARS315	ARS508	ARS1330	ARS1107.5	ARS1213	ARS523	ARS516	ARS1529.5	ARS1014	ARS1511	ARS820	ARS922	ARS418	ARS131n	ARS503	ARS131a	ARS432	ARS1211	ARS201	ARS909	ARS317	ARS415	ARS1008	ARS1415	ARS229	ARS1601	ARS1614	ARS731	ARS600.1	ARS913	ARS1018	ARS824	ARS318	ARS720	ARS714	ARS1123	ARS220	ARS1623	ARS1325	ARS316	ARS432.5
-5000	0.88	0.98	1.05	0.95	1	0.87	0.98	0.89	0.93	0.86	0.93	0.93	0.97	1	0.96	0.93	0.84	0.84	0.93	0.83	0.91	1.23	1.19	1.11	0.99	1.01	1.27	0.9	1.11	0.88	0.92	0.94	1.07	1.2	1	0.94	1.41	1.07	0.84	0.92	1.08	0.89	0.94	1.05	1.02	0.99	1.03	1.06	1.11
-4750	0.97	0.99	1.03	0.98	0.99	0.92	0.93	0.94	1.04	0.85	0.86	0.92	0.97	1.15	0.95	0.94	0.86	0.87	0.92	0.87	0.97	1.2	1.17	1	0.98	1.03	1.32	0.91	1.1	0.86	1.02	0.97	1.02	1.21	0.97	0.96	1.51	1.03	0.84	0.93	1.04	0.91	0.95	1.06	0.93	0.98	0.99	0.97	1.14
-4500	0.99	1.05	1.02	0.93	0.99	0.97	0.93	0.91	0.99	0.92	0.9	0.96	0.98	1.12	1	0.88	0.87	0.86	0.9	0.85	0.9	1.32	1.28	1.02	1.03	1	1.24	0.94	1.14	0.84	1.05	0.99	1.03	1.19	0.97	1.06	1.37	1.14	0.9	1.02	1.1	0.92	0.96	1.05	0.92	0.97	1.06	1.04	1.1
-4250	0.82	1.05	1.04	0.93	1	0.92	0.92	0.94	0.93	0.93	0.91	0.99	0.93	1.08	0.92	0.94	0.83	0.9	0.94	0.9	0.93	1.29	1.31	0.94	1	1.06	1.33	0.92	1.16	0.92	0.98	0.98	1.01	1.17	0.97	1.03	1.16	1.17	0.97	0.93	1.09	0.99	0.93	0.99	1	0.95	1.03	0.99	1.06
-4000	0.93	1.13	0.99	1.01	1.06	0.95	1.1	0.94	0.98	0.92	0.92	0.97	0.96	1.09	0.91	0.95	0.89	0.92	0.98	0.86	0.95	1.21	1.26	1.04	1.02	1.09	1.26	1	1.13	0.99	1.16	1.01	1	1.1	1.01	1.01	1.21	1.04	0.95	0.99	1.08	0.96	0.95	1.11	1.02	0.95	1.04	0.99	1.03
-3750	1.09	1.13	1.03	1.01	1.03	0.97	1.09	1.02	1	0.94	0.93	0.99	1	1.09	0.97	0.94	0.94	0.95	0.96	0.88	0.99	1.2	1.21	1.2	1.02	1.03	1.32	0.98	1.08	0.97	1.11	0.99	1.11	1.11	0.99	0.97	1.16	1.04	0.99	1.01	1.09	0.99	0.99	1.04	1.05	0.99	0.98	1.05	1.11
-3500	1.03	1.02	1.06	1.14	1.11	0.94	1.13	1.04	1.1	0.98	0.96	1	0.96	1.08	0.91	0.95	0.97	0.94	1.02	0.98	0.98	1.3	1.18	0.99	1.05	1.04	1.24	1.05	1.14	1.02	1	1.02	1.02	1.09	1.04	1.02	1.14	1.06	1.01	1.02	1.12	1.02	1.02	1.08	1.1	1.01	0.95	1.02	1.09
-3250	1.01	1.11	1.12	1.13	1.14	0.96	1.18	1.14	1.13	1.05	1.03	1.06	1.04	1.07	0.94	1	1.03	0.97	1.09	1	0.98	1.24	1.14	0.86	0.98	1.06	1.15	1.02	1.16	1.04	0.98	1.06	1.01	1.17	1.01	1.1	1.12	1.11	0.93	1.03	1.1	1.03	1.01	1.04	1.02	1.02	1	1.02	1.18
-3000	1.02	1.08	1.04	1.17	1.1	1.04	1.12	1.12	1.09	1.05	1.07	1.06	1.14	1.08	1.01	0.97	1.05	1.05	1.11	1.01	1	1.14	1.12	0.99	1	1.02	1.08	1.05	1.17	1.03	0.99	1.1	1.09	1.19	1.09	1.13	1.12	1.11	1.04	1.01	1.07	1.03	0.98	1.1	1.02	1.01	1.02	1.07	1.08
-2750	1.06	1.07	1.13	1.11	1.13	1.08	1.12	1.06	1.1	1.11	1.05	1.06	1.07	1.18	1.01	1.06	1.03	1.09	1.09	1.03	1.02	1.15	1.18	1.18	0.97	1.07	1.09	1.09	1.08	1.05	1.09	1.11	1.09	1.15	1.14	1.16	1.09	1.14	1.08	0.99	1.14	1.03	0.98	1.01	1.04	1.08	1.01	1.06	1.05
-2500	1.16	1.14	1.08	1.18	1.18	1.1	1.17	1.04	1.12	1.17	1.09	1.06	1.09	1.17	1.08	1.13	1.09	1.12	1.06	1.01	1.08	1.17	1.14	1.05	1.13	1.11	1.12	1.09	1.04	1.04	1.18	1.06	1.11	1.16	1.09	1.11	1.1	1.12	1.1	1.01	1.11	1.11	1.06	1	1.16	1.06	1.16	1.01	1.1
-2250	1.31	1.21	1.09	1.24	1.12	1.1	1.18	1.08	1.18	1.12	1.16	1.04	1.17	1.05	1.15	1.12	1.19	1.17	1.18	1.09	1.21	1.17	1.02	1.03	1.19	1.11	1.11	1.1	1.1	1.14	1.18	1.24	1.11	1.18	1.12	1.12	1.11	1.07	1.13	0.98	1.13	1.12	1.07	1.08	1.19	1.08	1.07	1.07	1.16
-2000	1.28	1.22	1.12	1.25	1.09	1.19	1.1	1.17	1.13	1.2	1.21	1.17	1.23	1.08	1.1	1.12	1.24	1.18	1.28	1.18	1.19	1.14	1.08	1.06	1.07	1.08	1.16	1.18	1.09	1.18	1.17	1.12	1.14	1.2	1.11	1.08	1.2	1.16	1.12	0.99	1.06	1.12	1.11	1.09	1.14	1.14	1.02	1.04	1.04
-1750	1.24	1.23	1.19	1.15	1.18	1.25	1.2	1.24	1.16	1.27	1.26	1.2	1.13	1.06	1.11	1.13	1.23	1.22	1.31	1.24	1.19	1.15	1.05	1.09	1.12	1.14	1.13	1.22	1.08	1.15	1.16	1.11	1.1	1.17	1.12	1.07	1.09	1.17	1.14	1.02	1.02	1.07	1.05	1.04	1.16	1.14	1.06	1.06	1.02
-1500	1.28	1.24	1.27	1.12	1.19	1.26	1.24	1.22	1.22	1.25	1.28	1.21	1.13	1.07	1.21	1.1	1.18	1.2	1.2	1.23	1.19	1.23	1.04	1.07	1.08	1.27	1.25	1.2	1.09	1.12	1.06	1.17	1.15	1.14	1.18	1.09	1.15	1.11	1.12	1.01	1.09	1.09	1.09	1.06	1.05	1.1	1.16	1.03	1.08
-1250	1.32	1.19	1.33	1.16	1.16	1.32	1.28	1.22	1.21	1.22	1.33	1.16	1.15	1.05	1.17	1.18	1.14	1.28	1.16	1.25	1.18	1.22	1.13	1.02	1.17	1.25	1.12	1.25	1.12	1.17	1.05	1.09	1.1	1.05	1.2	1.11	1	1.12	1.23	1.07	1.06	1.1	1.16	1.12	1.1	1.12	1.13	1.07	1.08
-1000	1.29	1.24	1.25	1.23	1.21	1.3	1.32	1.37	1.21	1.25	1.35	1.19	1.19	1.09	1.23	1.24	1.23	1.38	1.19	1.19	1.25	1.2	1.12	0.99	1.2	1.22	1.09	1.2	1.1	1.26	1.08	1.14	1.11	0.99	1.19	1.12	0.98	1.2	1.14	1.04	1.06	1.14	1.12	1.15	1.11	1.12	1.17	1.04	1.08
-750	1.31	1.26	1.25	1.29	1.19	1.29	1.29	1.25	1.15	1.26	1.27	1.22	1.22	1.18	1.29	1.21	1.33	1.26	1.19	1.22	1.21	1.09	1.14	1.08	1.25	1.17	1.04	1.27	1.07	1.21	1.09	1.12	1.13	0.97	1.15	1.16	0.95	1.19	1.17	0.98	1.08	1.14	1.11	1.12	1.15	1.12	1.18	1.05	1.12
-500	1.34	1.25	1.26	1.33	1.24	1.31	1.31	1.2	1.18	1.27	1.28	1.25	1.28	1.09	1.21	1.3	1.27	1.3	1.18	1.19	1.19	1.03	1.02	1.14	1.38	1.2	0.92	1.2	1.14	1.21	1.17	1.2	1.15	1.04	1.23	1.22	1.03	1.16	1.25	1.02	1.05	1.12	1.16	1.07	1.18	1.23	1.15	1.09	1.11
-250	1.39	1.31	1.27	1.34	1.42	1.32	1.24	1.22	1.21	1.41	1.27	1.29	1.32	1.03	1.18	1.3	1.32	1.34	1.21	1.24	1.27	1.04	1.04	1.19	1.35	1.23	1.09	1.18	1.11	1.23	1.27	1.19	1.19	1.09	1.2	1.27	1.1	1.18	1.13	1.06	1.13	1.17	1.19	1.05	1.19	1.22	1.16	1.11	1.16
Midpoint	1.44	1.4	1.28	1.44	1.4	1.33	1.2	1.36	1.35	1.48	1.32	1.27	1.33	1.07	1.25	1.3	1.34	1.26	1.22	1.35	1.32	1.02	1.02	1.17	1.29	1.24	1.07	1.25	1.13	1.29	1.16	1.27	1.25	1.02	1.2	1.33	1.02	1.26	1.12	1.05	1.09	1.23	1.2	1.1	1.21	1.24	1.21	1.14	1.2
250	1.54	1.37	1.34	1.29	1.32	1.3	1.19	1.39	1.22	1.4	1.28	1.26	1.34	0.98	1.23	1.34	1.35	1.34	1.2	1.37	1.34	1.01	1.06	1.07	1.2	1.3	1.06	1.19	1.06	1.18	1.21	1.18	1.22	1.1	1.2	1.19	0.98	1.16	1.27	1.03	1.06	1.2	1.23	1.12	1.16	1.22	1.2	1.23	1.07
500	1.37	1.26	1.21	1.24	1.33	1.33	1.27	1.32	1.15	1.37	1.26	1.26	1.28	1.02	1.25	1.36	1.26	1.24	1.19	1.38	1.19	1	1.04	1.03	1.08	1.19	1.03	1.11	1.02	1.21	1.2	1.16	1.09	0.98	1.19	1.06	1.11	1.14	1.17	1.05	1.06	1.22	1.22	1.09	1.14	1.23	1.19	1.18	1.07
750	1.25	1.18	1.17	1.2	1.25	1.34	1.3	1.24	1.21	1.29	1.38	1.27	1.16	1.02	1.24	1.33	1.23	1.35	1.24	1.35	1.2	1.06	1.05	1.05	1.03	1.17	1.12	1.14	1.09	1.22	1.2	1.14	1.06	1.06	1.15	1.07	0.95	1.15	1.21	0.96	1.01	1.12	1.22	1.08	1.23	1.2	1.18	1.17	1.22
1000	1.26	1.18	1.2	1.24	1.23	1.27	1.24	1.27	1.18	1.24	1.37	1.21	1.13	1.07	1.28	1.32	1.21	1.28	1.31	1.29	1.23	1.03	1.1	1.04	0.99	1.19	1.11	1.17	1.06	1.22	1.19	1.18	1.13	1.09	1.09	1.13	0.98	1.09	1.32	1.1	1.08	1.08	1.17	1.11	1.17	1.17	1.18	1.09	1.19
1250	1.34	1.23	1.13	1.21	1.26	1.27	1.2	1.24	1.24	1.23	1.23	1.26	1.26	1.14	1.33	1.22	1.23	1.36	1.27	1.27	1.26	1.01	1.11	1.14	0.99	1.15	1.05	1.13	1.06	1.27	1.19	1.16	1.17	1.12	1.16	1.16	1.08	1.13	1.26	1.12	1.16	1.13	1.14	1.15	1.17	1.16	1.11	1.08	1.15
1500	1.32	1.23	1.13	1.28	1.22	1.33	1.23	1.26	1.25	1.25	1.22	1.25	1.19	1.09	1.23	1.24	1.2	1.27	1.26	1.26	1.22	0.99	1.07	1.19	1.09	1.14	1.05	1.12	1.08	1.27	1.18	1.23	1.09	1.13	1.17	1.22	0.98	1.1	1.17	1.19	1.16	1.12	1.22	1.13	1.12	1.14	1.07	1.09	1.07
1750	1.27	1.17	1.19	1.19	1.18	1.29	1.18	1.23	1.19	1.21	1.18	1.15	1.16	1.1	1.25	1.23	1.29	1.24	1.13	1.22	1.24	1.05	1.02	1.12	1.11	1.14	0.97	1.14	1.05	1.2	1.14	1.07	1.07	1.08	1.13	1.14	0.97	1.05	1.2	1.22	1.13	1.09	1.13	1.09	1.07	1.06	1.08	1.06	1.07
2000	1.26	1.16	1.23	1.17	1.14	1.23	1.08	1.17	1.16	1.15	1.21	1.12	1.08	1.15	1.23	1.15	1.15	1.22	1.16	1.2	1.19	1.09	1.16	1.18	1.14	1.14	0.98	1.21	1.13	1.17	1.19	1.08	1.09	1.03	1.13	1.09	0.98	1.13	1.15	1.18	1.03	1.11	1.21	1.06	1.1	1.05	1.12	1	1.12
2250	1.18	1.1	1.07	1.16	1.12	1.21	1.13	1.18	1.12	1.15	1.17	1.2	1.15	1.15	1.21	1.19	1.14	1.06	1.09	1.13	1.15	1.1	1.09	1.17	1.1	1.1	0.99	1.15	1.09	0.79	1.17	1.11	1.13	1.02	1.12	1.2	1.01	1.02	1.11	1.13	1.05	1.12	1.17	1.01	1.06	1.1	1.07	1.06	1.03
2500	1.16	1.15	1.11	1.09	1.1	1.2	1.1	1.15	1.13	1.14	1.12	1.28	1.15	1.12	1.09	1.15	1.16	1.1	1.11	1.12	1.09	1.1	1.11	1.16	1.06	1.06	1.06	1.1	1.06	1.17	1.11	1.05	1.06	1	1.01	1.06	1.02	1.05	1.1	1.16	1.03	1.07	1.07	1.04	1.06	1.1	1.05	1.02	1.05
2750	1.14	1.21	1.11	1.12	1.13	1.19	1.12	1.14	1.3	1.1	1.09	1.11	1.1	1.18	1.08	1.06	1.21	1.11	1.11	1.14	1.13	0.99	1.07	1.18	1.03	1.12	1.11	1.17	1.06	1.08	1.04	1.06	1.05	1.02	0.96	1.04	1.16	1.1	1.03	1.14	1.03	1.02	1.04	1.1	1	1.05	1.08	1.05	0.95
3000	1.16	1.09	1.12	1.07	1.13	1.14	1.04	1.08	1.14	1.11	1.01	1.07	1.02	1.08	1.1	1.04	1.12	1.05	1.07	1.15	1.13	1.01	0.99	1.14	1.11	1.14	0.92	1.07	1.01	1.11	0.99	1.07	1.08	0.95	1.09	1.11	1.01	1.05	1.12	1.1	1.04	1.02	1.08	1.03	0.97	1.08	0.96	1.06	0.94
3250	1.15	1.04	1.07	1	1.07	1.11	0.98	1.15	1.12	1.03	1.03	1.07	1.1	1.18	1.11	1.03	1.05	1.03	1.06	1.11	1	1.04	1.01	1.11	1.09	1.05	0.97	1.06	1.08	1.09	0.99	1.09	1.07	1.01	1.07	1.07	1.06	0.99	1.19	1.21	1	1.1	1.04	1.07	0.97	1.04	0.96	1.09	1
3500	1.16	1.08	1.04	0.99	1.07	1.02	1.05	1.11	1.06	0.94	0.99	1.06	1.03	1.14	1.1	1.06	1.03	0.98	1.05	1.03	0.98	0.99	1.05	1.12	1.18	1.01	1.02	1.03	1.16	1.03	1.03	1.05	0.98	1.02	1	1	0.98	0.91	1.1	1.23	1.01	1.09	1.01	1.06	1.05	1.02	1.08	1.09	1.04
3750	1.07	1.1	1.16	1.12	1.03	1	1	0.92	0.99	0.94	0.95	1.02	0.98	1.16	1.03	1.06	1.01	0.96	1.04	0.99	0.95	0.97	1.01	1.1	1.08	0.97	1.04	1.04	1.16	1.03	1.05	1.03	1.06	1.01	1	1	0.95	0.94	0.99	1.17	1.06	1.11	1.06	1.04	1	0.97	0.96	1.1	1.04
4000	1.06	1.06	1.08	1.05	0.98	0.99	0.96	0.97	1.04	0.9	0.95	0.99	0.95	1.14	1.04	0.99	0.96	0.94	0.96	0.97	0.99	0.95	1.07	1.09	1.05	0.96	1.05	1	1.13	1.09	0.96	0.97	1.01	1.04	1.02	0.99	0.97	0.95	0.96	1.22	1.05	1.05	1.04	1.02	0.97	0.91	0.94	1.08	0.99
4250	0.97	1	1.06	0.98	1.02	0.97	0.93	0.97	1.05	0.91	0.93	0.98	1.04	1.21	1.04	1.01	0.88	0.93	0.92	0.92	0.96	0.94	1.03	1.19	1.1	0.91	0.98	0.98	1.03	1.05	1.02	1.06	1.07	1.07	1.02	0.96	1.03	0.96	0.97	1.2	1.06	1.12	1.02	1.09	1	0.93	0.95	1.11	0.96
4500	1	0.98	1.05	0.93	0.96	0.93	0.96	0.97	0.96	0.9	0.94	1	1.04	1.15	1.06	0.97	0.91	0.93	0.9	0.92	0.99	0.95	1.04	1.21	1.16	0.87	0.93	0.96	1.05	0.99	0.98	1.09	1.05	1.09	0.98	0.93	1.08	0.97	0.97	1.22	1.05	1.01	1	1.09	0.99	1.01	1.05	1.09	0.94
4750	0.99	1	1.03	0.96	0.86	0.87	1.05	0.93	0.95	0.91	0.97	0.98	0.99	1.22	0.98	0.93	0.99	0.88	0.95	0.92	0.95	0.94	1.02	1.22	1.04	0.91	0.99	0.99	1.03	0.96	0.94	0.95	1.04	1.04	0.99	0.96	1.08	0.91	0.94	1.23	1.13	1.03	0.97	1.05	0.94	0.93	1.02	1.07	0.92
5000	0.95	0.95	1.01	0.98	0.91	0.82	1.02	0.96	0.97	0.93	0.9	0.94	1	1.23	0.94	0.93	0.99	0.86	0.94	0.93	0.91	1.01	1.03	1.24	1.02	0.94	1	1.03	1.03	0.9	0.97	0.98	1.03	1.06	1.01	0.96	1	0.94	0.94	1.22	1.1	1.04	0.93	1.04	0.92	0.96	1	1.12	0.9
[truncated: 350 more columns]

## Sheet: 191_WT_Fig2,4
ARS1021	ARS922	ARS1529.5	ARS305	ARS1330	ARS315	ARS508	ARS306	ARS1511	ARS607	ARS731.5	ARS428	ARS432.5	ARS1114	ARS432	ARS418	ARS110		ARS1218	ARS1213	ARS1310	ARS1211	ARS1014	ARS1309	ARS108	ARS307	ARS731	ARS208	ARS815	ARS913	ARS510	ARS1019	ARS720	ARS1018	ARS606	ARS202	ARS1113.5	ARS209	ARS415	ARS523	ARS1332	ARS1107.5	ARS1103	ARS201	ARS1012	ARS920	ARS1013	ARS1510	ARS1018.5	ARS1002
1.22	1.29	1.32	1.29	1.24	1.24	1.31	1.33	1.24	1.26	1.18	1.21	1.33	1.19	1.23	1.23	1.21	-5000	0.98	1.23	1.19	1.21	1.21	1.22	1.17	1.22	1.19	1.2	1.26	1.1	1.26	1.13	1.18	1.17	1.17	1.21	0.94	1.23	1.16	1.09	1.11	1.18	1.21	1.47	1.16	1.07	1.19	1.12	0.99	1.45
1.25	1.29	1.33	1.32	1.31	1.28	1.29	1.3	1.26	1.3	1.23	1.23	1.34	1.25	1.25	1.22	1.17	-4750	0.93	1.26	1.21	1.15	1.26	1.21	1.17	1.26	1.24	1.18	1.2	1.18	1.23	1.13	1.18	1.19	1.21	1.21	0.88	1.21	1.19	1.04	1.15	1.19	1.17	1.52	1.18	1.1	1.19	1.15	0.97	1.42
1.3	1.35	1.43	1.33	1.34	1.3	1.3	1.33	1.3	1.35	1.14	1.24	1.4	1.27	1.3	1.29	1.19	-4500	0.91	1.24	1.21	1.17	1.28	1.23	1.21	1.26	1.29	1.19	1.22	1.16	1.23	1.15	1.18	1.25	1.2	1.2	0.93	1.23	1.19	1.06	1.14	1.23	1.16	1.48	1.14	1.15	1.21	1.2	0.97	1.46
1.37	1.37	1.38	1.37	1.34	1.31	1.24	1.36	1.32	1.35	1.15	1.3	1.43	1.29	1.33	1.3	1.25	-4250	0.89	1.27	1.2	1.24	1.23	1.25	1.25	1.28	1.3	1.27	1.26	1.21	1.27	1.23	1.23	1.21	1.21	1.2	0.99	1.27	1.24	1.1	1.17	1.19	1.19	1.44	1.21	1.2	1.24	1.23	0.95	1.45
1.39	1.34	1.38	1.44	1.33	1.35	1.29	1.4	1.35	1.35	1.23	1.32	1.43	1.29	1.27	1.29	1.31	-4000	1.19	1.26	1.23	1.26	1.25	1.31	1.22	1.3	1.26	1.3	1.3	1.31	1.23	1.23	1.26	1.23	1.21	1.24	1.08	1.3	1.24	1.11	1.22	1.21	1.23	1.4	1.19	1.22	1.23	1.18	1.01	1.47
1.35	1.37	1.35	1.44	1.34	1.33	1.34	1.39	1.39	1.33	1.38	1.34	1.46	1.32	1.32	1.32	1.29	-3750	1.31	1.28	1.26	1.25	1.26	1.25	1.22	1.35	1.24	1.32	1.29	1.3	1.29	1.27	1.29	1.23	1.25	1.27	1.07	1.3	1.25	1.13	1.25	1.2	1.28	1.39	1.19	1.2	1.28	1.18	1.02	1.51
1.44	1.33	1.4	1.43	1.38	1.36	1.41	1.34	1.36	1.35	1.4	1.32	1.45	1.3	1.27	1.3	1.32	-3500	1.34	1.34	1.3	1.24	1.25	1.25	1.23	1.32	1.3	1.32	1.32	1.33	1.34	1.29	1.25	1.31	1.26	1.32	1.11	1.34	1.26	1.2	1.24	1.22	1.3	1.38	1.21	1.25	1.3	1.24	0.99	1.48
1.45	1.36	1.43	1.44	1.43	1.36	1.39	1.36	1.43	1.37	1.38	1.36	1.37	1.34	1.25	1.32	1.31	-3250	1.38	1.31	1.33	1.31	1.27	1.31	1.32	1.29	1.3	1.29	1.29	1.34	1.29	1.3	1.29	1.38	1.29	1.3	1.1	1.31	1.28	1.17	1.26	1.24	1.25	1.42	1.24	1.2	1.28	1.27	1.1	1.47
1.47	1.38	1.43	1.45	1.4	1.37	1.37	1.37	1.44	1.42	1.42	1.36	1.36	1.39	1.3	1.39	1.36	-3000	1.36	1.36	1.39	1.38	1.33	1.36	1.34	1.35	1.32	1.33	1.33	1.35	1.32	1.3	1.28	1.3	1.29	1.29	1.14	1.3	1.28	1.16	1.24	1.25	1.26	1.4	1.23	1.21	1.27	1.25	1.13	1.43
1.44	1.42	1.42	1.52	1.43	1.4	1.42	1.49	1.43	1.41	1.41	1.38	1.39	1.36	1.31	1.4	1.35	-2750	1.43	1.4	1.34	1.37	1.36	1.36	1.36	1.37	1.33	1.31	1.35	1.34	1.28	1.34	1.31	1.27	1.31	1.31	1.15	1.36	1.27	1.14	1.26	1.22	1.26	1.35	1.28	1.22	1.31	1.19	1.08	1.46
1.52	1.44	1.48	1.45	1.4	1.43	1.42	1.44	1.41	1.44	1.37	1.39	1.41	1.43	1.33	1.35	1.41	-2500	1.4	1.41	1.37	1.4	1.4	1.34	1.32	1.36	1.33	1.33	1.26	1.33	1.32	1.36	1.3	1.26	1.32	1.32	1.16	1.4	1.28	1.14	1.3	1.23	1.26	1.34	1.3	1.23	1.27	1.26	1.1	1.43
1.53	1.52	1.48	1.45	1.43	1.39	1.46	1.43	1.45	1.42	1.38	1.4	1.44	1.4	1.37	1.36	1.4	-2250	1.4	1.42	1.3	1.39	1.4	1.35	1.38	1.32	1.37	1.39	1.27	1.36	1.33	1.35	1.31	1.22	1.31	1.33	1.22	1.36	1.3	1.15	1.28	1.29	1.26	1.34	1.28	1.24	1.22	1.25	1.12	1.42
1.43	1.51	1.47	1.46	1.47	1.44	1.44	1.38	1.44	1.42	1.38	1.41	1.43	1.35	1.42	1.37	1.44	-2000	1.4	1.37	1.31	1.37	1.39	1.37	1.39	1.38	1.33	1.4	1.31	1.41	1.34	1.31	1.32	1.21	1.31	1.35	1.19	1.4	1.31	1.16	1.29	1.27	1.31	1.34	1.27	1.27	1.25	1.23	1.14	1.37
1.47	1.49	1.48	1.44	1.47	1.44	1.46	1.43	1.48	1.44	1.37	1.44	1.48	1.4	1.35	1.4	1.41	-1750	1.41	1.4	1.33	1.4	1.35	1.35	1.34	1.45	1.4	1.39	1.33	1.39	1.34	1.37	1.29	1.36	1.32	1.38	1.25	1.36	1.33	1.19	1.34	1.3	1.3	1.31	1.31	1.22	1.28	1.25	1.15	1.37
1.49	1.48	1.48	1.48	1.52	1.48	1.43	1.45	1.47	1.43	1.41	1.42	1.46	1.43	1.3	1.45	1.46	-1500	1.43	1.4	1.35	1.36	1.38	1.39	1.34	1.43	1.41	1.39	1.35	1.32	1.34	1.38	1.29	1.3	1.36	1.39	1.27	1.36	1.29	1.22	1.35	1.29	1.33	1.3	1.27	1.26	1.24	1.25	1.13	1.34
1.51	1.48	1.56	1.49	1.54	1.47	1.45	1.47	1.47	1.43	1.45	1.48	1.42	1.4	1.34	1.45	1.44	-1250	1.45	1.41	1.38	1.4	1.41	1.43	1.38	1.44	1.4	1.41	1.43	1.33	1.33	1.36	1.34	1.35	1.34	1.37	1.29	1.4	1.33	1.25	1.33	1.3	1.34	1.35	1.22	1.28	1.26	1.29	1.13	1.34
1.57	1.5	1.59	1.52	1.51	1.5	1.52	1.46	1.49	1.47	1.52	1.48	1.4	1.37	1.37	1.45	1.45	-1000	1.42	1.46	1.4	1.36	1.4	1.4	1.4	1.41	1.47	1.38	1.39	1.37	1.41	1.33	1.43	1.38	1.33	1.41	1.29	1.45	1.31	1.22	1.34	1.25	1.32	1.33	1.25	1.28	1.28	1.28	1.15	1.31
1.47	1.5	1.54	1.53	1.49	1.48	1.54	1.47	1.45	1.5	1.49	1.47	1.4	1.44	1.37	1.43	1.46	-750	1.48	1.5	1.47	1.34	1.36	1.43	1.46	1.37	1.44	1.39	1.4	1.37	1.43	1.4	1.43	1.34	1.34	1.4	1.32	1.43	1.27	1.26	1.28	1.3	1.31	1.32	1.28	1.27	1.29	1.33	1.23	1.23
1.51	1.54	1.5	1.52	1.46	1.42	1.5	1.46	1.56	1.5	1.5	1.45	1.44	1.44	1.37	1.41	1.45	-500	1.48	1.45	1.47	1.4	1.29	1.47	1.4	1.36	1.4	1.41	1.37	1.39	1.41	1.38	1.4	1.39	1.41	1.39	1.3	1.45	1.28	1.3	1.35	1.27	1.29	1.24	1.24	1.34	1.39	1.33	1.23	0.98
1.56	1.54	1.54	1.55	1.53	1.45	1.46	1.45	1.54	1.49	1.45	1.47	1.42	1.42	1.34	1.38	1.34	-250	1.47	1.42	1.42	1.44	1.3	1.45	1.42	1.41	1.39	1.41	1.4	1.4	1.37	1.42	1.34	1.4	1.35	1.34	1.34	1.4	1.32	1.33	1.34	1.25	1.31	1.32	1.26	1.37	1.3	1.29	1.27	1.18
1.51	1.47	1.51	1.52	1.54	1.41	1.44	1.42	1.46	1.42	1.43	1.47	1.43	1.44	1.47	1.38	1.33	Midpoint	1.53	1.42	1.37	1.39	1.29	1.43	1.44	1.43	1.44	1.38	1.37	1.43	1.37	1.36	1.35	1.4	1.37	1.35	1.39	1.37	1.3	1.25	1.32	1.29	1.34	1.31	1.28	1.32	1.28	1.29	1.29	1.15
1.52	1.49	1.56	1.53	1.49	1.43	1.45	1.45	1.43	1.39	1.48	1.36	1.36	1.42	1.39	1.37	1.36	250	1.47	1.35	1.38	1.43	1.42	1.39	1.44	1.46	1.41	1.35	1.39	1.41	1.38	1.35	1.32	1.43	1.4	1.39	1.36	1.39	1.28	1.23	1.29	1.34	1.33	1.22	1.29	1.29	1.28	1.27	1.3	1.16
1.47	1.48	1.57	1.49	1.48	1.49	1.48	1.48	1.41	1.44	1.49	1.36	1.39	1.37	1.32	1.45	1.39	500	1.47	1.34	1.44	1.38	1.41	1.41	1.45	1.42	1.38	1.35	1.37	1.39	1.36	1.4	1.29	1.29	1.38	1.37	1.43	1.39	1.3	1.27	1.32	1.26	1.31	1.21	1.39	1.26	1.26	1.29	1.3	1.12
1.49	1.45	1.5	1.51	1.44	1.49	1.52	1.5	1.45	1.44	1.51	1.42	1.4	1.41	1.3	1.43	1.49	750	1.44	1.31	1.48	1.4	1.4	1.39	1.41	1.44	1.4	1.36	1.38	1.4	1.34	1.4	1.35	1.27	1.36	1.3	1.4	1.48	1.33	1.27	1.33	1.35	1.29	1.19	1.3	1.29	1.26	1.24	1.34	1.1
1.47	1.46	1.44	1.52	1.47	1.53	1.47	1.45	1.44	1.44	1.51	1.44	1.39	1.41	1.29	1.41	1.45	1000	1.46	1.43	1.44	1.37	1.48	1.41	1.42	1.46	1.44	1.4	1.42	1.38	1.36	1.35	1.41	1.25	1.4	1.33	1.35	1.44	1.35	1.29	1.37	1.29	1.27	1.18	1.28	1.32	1.28	1.26	1.36	1.12
1.52	1.44	1.48	1.53	1.53	1.52	1.47	1.43	1.47	1.4	1.48	1.56	1.37	1.46	1.31	1.39	1.42	1250	1.42	1.39	1.46	1.37	1.4	1.41	1.42	1.41	1.41	1.43	1.36	1.35	1.37	1.35	1.4	1.38	1.45	1.33	1.4	1.42	1.33	1.32	1.33	1.32	1.27	1.18	1.28	1.32	1.25	1.23	1.35	1.15
1.46	1.46	1.46	1.52	1.47	1.53	1.49	1.47	1.48	1.36	1.46	1.52	1.38	1.41	1.31	1.41	1.38	1500	1.44	1.38	1.38	1.4	1.36	1.35	1.4	1.32	1.35	1.42	1.36	1.33	1.38	1.32	1.36	1.35	1.42	1.35	1.43	1.42	1.3	1.29	1.29	1.32	1.27	1.18	1.26	1.31	1.28	1.23	1.31	1.12
1.51	1.54	1.48	1.51	1.44	1.5	1.53	1.47	1.49	1.42	1.46	1.51	1.36	1.34	1.33	1.41	1.37	1750	1.38	1.38	1.39	1.42	1.4	1.35	1.41	1.3	1.36	1.38	1.34	1.36	1.39	1.32	1.34	1.38	1.35	1.35	1.4	1.42	1.26	1.34	1.33	1.25	1.3	1.19	1.26	1.29	1.21	1.27	1.37	1.1
1.52	1.51	1.44	1.43	1.43	1.5	1.51	1.45	1.5	1.39	1.4	1.47	1.37	1.42	1.34	1.37	1.4	2000	1.41	1.36	1.35	1.39	1.36	1.39	1.41	1.32	1.32	1.38	1.35	1.39	1.38	1.28	1.34	1.35	1.32	1.3	1.37	1.42	1.26	1.35	1.28	1.25	1.28	1.16	1.28	1.29	1.2	1.24	1.38	1.14
1.53	1.48	1.49	1.37	1.48	1.45	1.49	1.43	1.39	1.36	1.45	1.46	1.37	1.46	1.4	1.4	1.36	2250	1.39	1.37	1.38	1.44	1.35	1.39	1.37	1.35	1.32	1.33	1.33	1.39	1.36	1.32	1.35	1.39	1.3	1.29	1.44	1.4	0.9	1.37	1.26	1.25	1.22	1.14	1.25	1.31	1.22	1.24	1.36	1.1
1.48	1.48	1.43	1.35	1.43	1.41	1.39	1.44	1.37	1.44	1.44	1.44	1.37	1.43	1.43	1.38	1.34	2500	1.36	1.36	1.37	1.41	1.41	1.37	1.35	1.3	1.33	1.28	1.29	1.33	1.37	1.37	1.33	1.4	1.29	1.29	1.44	1.41	1.28	1.33	1.23	1.27	1.27	1.06	1.28	1.29	1.22	1.24	1.33	1.08
1.49	1.47	1.47	1.33	1.4	1.39	1.4	1.42	1.38	1.42	1.42	1.4	1.37	1.37	1.43	1.33	1.35	2750	1.39	1.35	1.36	1.36	1.38	1.31	1.36	1.33	1.34	1.3	1.27	1.27	1.35	1.37	1.35	1.42	1.29	1.28	1.42	1.44	1.29	1.34	1.24	1.3	1.24	1.06	1.21	1.23	1.23	1.22	1.4	1.09
1.43	1.53	1.4	1.38	1.36	1.4	1.37	1.4	1.33	1.37	1.37	1.37	1.34	1.38	1.46	1.34	1.36	3000	1.42	1.3	1.29	1.36	1.41	1.31	1.36	1.3	1.37	1.3	1.25	1.22	1.3	1.35	1.3	1.35	1.34	1.24	1.44	1.39	1.3	1.4	1.24	1.24	1.29	1.14	1.2	1.2	1.23	1.24	1.38	1.07
1.42	1.49	1.39	1.35	1.4	1.4	1.32	1.32	1.37	1.4	1.37	1.36	1.3	1.4	1.45	1.34	1.36	3250	1.39	1.31	1.31	1.33	1.36	1.33	1.31	1.24	1.29	1.3	1.29	1.25	1.33	1.33	1.32	1.3	1.34	1.24	1.42	1.38	1.3	1.42	1.27	1.26	1.26	1.1	1.22	1.22	1.24	1.19	1.42	1.02
1.36	1.43	1.35	1.32	1.42	1.36	1.31	1.35	1.34	1.4	1.41	1.31	1.28	1.43	1.37	1.35	1.34	3500	1.39	1.31	1.27	1.31	1.37	1.28	1.31	1.24	1.3	1.28	1.32	1.21	1.28	1.27	1.27	1.28	1.24	1.2	1.37	1.33	1.33	1.42	1.22	1.26	1.24	1.11	1.22	1.24	1.22	1.25	1.36	1.05
1.39	1.39	1.33	1.34	1.37	1.41	1.34	1.32	1.33	1.35	1.38	1.28	1.27	1.33	1.36	1.33	1.31	3750	1.35	1.33	1.29	1.35	1.27	1.28	1.31	1.24	1.26	1.23	1.31	1.27	1.23	1.24	1.3	1.25	1.24	1.23	1.41	1.2	1.28	1.42	1.21	1.27	1.21	1.04	1.23	1.22	1.18	1.21	1.35	1.04
1.37	1.38	1.29	1.31	1.39	1.38	1.33	1.32	1.26	1.35	1.34	1.34	1.27	1.41	1.39	1.31	1.26	4000	1.33	1.31	1.28	1.3	1.26	1.32	1.29	1.22	1.25	1.25	1.28	1.26	1.27	1.23	1.25	1.29	1.17	1.17	1.41	0	1.26	1.41	1.22	1.25	1.2	1.02	1.23	1.21	1.14	1.22	1.4	0.95
1.35	1.38	1.25	1.25	1.36	1.33	1.3	1.28	1.25	1.36	1.37	1.36	1.27	1.39	1.41	1.28	1.27	4250	1.31	1.24	1.27	1.3	1.3	1.25	1.21	1.23	1.25	1.25	1.28	1.29	1.23	1.19	1.26	1.24	1.21	1.16	1.46	0	1.28	1.44	1.22	1.25	1.14	1.05	1.24	1.19	1.12	1.22	1.4	0.96
1.36	1.35	1.25	1.3	1.36	1.31	1.28	1.25	1.3	1.28	1.36	1.32	1.25	1.3	1.44	1.24	1.28	4500	1.32	1.25	1.32	1.25	1.25	1.24	1.21	1.2	1.18	1.26	1.27	1.25	1.16	1.2	1.25	1.21	1.17	1.14	1.41	0.91	1.25	1.44	1.18	1.23	1.16	1.03	1.22	1.15	1.14	1.15	1.35	0.96
1.34	1.32	1.29	1.24	1.33	1.29	1.23	1.28	1.25	1.33	1.29	1.33	1.24	1.3	1.43	1.2	1.28	4750	1.25	1.22	1.31	1.27	1.25	1.18	1.21	1.2	1.15	1.24	1.25	1.23	1.18	1.22	1.24	1.23	1.12	1.11	1.34	0.95	1.21	1.42	1.14	1.21	1.15	1	1.18	1.16	1.12	1.15	1.35	0.98
1.33	1.34	1.33	1.19	1.25	1.28	1.23	1.24	1.2	1.28	1.3	1.24	1.24	1.25	1.48	1.26	1.27	5000	1.21	1.22	1.28	1.2	1.23	1.16	1.21	1.2	1.14	1.2	1.19	1.22	1.15	1.21	1.16	1.21	1.15	1.16	1.42	0.98	1.19	1.41	1.14	1.22	1.15	1.01	1.14	1.13	1.12	1.13	1.32	1
[truncated: 350 more columns]

## Sheet: 151_ndbf4_Fig2
	ARS922	ARS1021	ARS305	ARS1529.5	ARS731.5	ARS508	ARS1103	ARS306	ARS315	ARS1330	ARS607	ARS1511	ARS432.5	ARS1018	ARS110	ARS428	ARS1014	ARS1332	ARS432	ARS1310	ARS511	ARS731	ARS202	ARS1223	ARS1107.5	ARS1019	ARS1012	ARS1218	ARS1008	ARS815	ARS1013	ARS1513.5	ARS913	ARS1623	ARS418	ARS516	ARS1217	ARS1211	ARS1213	ARS1510	ARS820	ARS1215	ARS909	ARS415	ARS1614	ARS606	ARS1109	ARS1303	ARS209
-5000	1.12	1.09	1.14	1.08	0.99	1.05	1.16	1.11	1.09	1.04	1.09	1.04	1.26	1.07	1.06	1.06	1.03	1.14	1.11	1.01	1.03	1.03	1.11	1.05	1.07	1.06	0.99	0.95	1.11	1.07	1.13	1.06	1.1	1.04	1.05	1.07	1.1	1.05	1.05	1.08	1.01	1.06	1.04	1.02	1.01	1.02	0.96	1.08	1.12
-4750	1.18	1.14	1.17	1.09	1.1	1.13	1.19	1.11	1.17	1.09	1.16	1.13	1.36	1.07	1.11	1.06	1.07	1.14	1.22	1	1.06	1.03	1.17	1.14	1.06	1.14	1.09	0.99	1.12	1.07	1.16	1.07	1.14	1.11	1.07	1.05	1.13	1.07	1.09	1.1	1.06	1.09	1.07	1.02	1.05	1.02	1.02	1.11	1.16
-4500	1.17	1.14	1.24	1.07	1.09	1.17	1.25	1.18	1.19	1.11	1.14	1.14	1.35	1.14	1.16	1.07	1.1	1.18	1.2	1.07	1.12	1.11	1.17	1.2	1.1	1.11	1.1	1	1.12	1.12	1.19	1.05	1.12	1.12	1.05	1.08	1.2	1.1	1.09	1.08	1.09	1.13	1.09	1.09	1.08	1.06	1.05	1.13	1.13
-4250	1.19	1.14	1.24	1.11	1.03	1.28	1.22	1.19	1.21	1.12	1.19	1.17	1.3	1.19	1.25	1.09	1.11	1.16	1.23	1.12	1.18	1.15	1.2	1.12	1.13	1.14	1.11	1.03	1.21	1.09	1.21	1.04	1.14	1.11	1.12	1.11	1.2	1.2	1.11	1.08	1.12	1.15	1.12	1.12	1.1	1.06	1.14	1.15	1.13
-4000	1.26	1.25	1.26	1.15	1.06	1.26	1.29	1.26	1.25	1.14	1.21	1.21	1.3	1.21	1.22	1.15	1.21	1.23	1.3	1.13	1.19	1.2	1.24	1.18	1.14	1.15	1.13	1.23	1.23	1.11	1.25	1.08	1.16	1.17	1.14	1.15	1.16	1.23	1.17	1.09	1.21	1.14	1.13	1.16	1.18	1.09	1.22	1.22	1.18
-3750	1.25	1.25	1.27	1.17	1.21	1.22	1.3	1.28	1.26	1.16	1.24	1.19	1.39	1.23	1.27	1.17	1.25	1.28	1.28	1.15	1.15	1.21	1.27	1.2	1.18	1.17	1.16	1.26	1.25	1.19	1.29	1.15	1.17	1.16	1.17	1.16	1.18	1.18	1.25	1.12	1.21	1.17	1.16	1.14	1.2	1.16	1.19	1.23	1.23
-3500	1.34	1.28	1.28	1.21	1.24	1.26	1.33	1.3	1.31	1.24	1.23	1.2	1.42	1.24	1.28	1.25	1.24	1.32	1.23	1.17	1.22	1.24	1.28	1.23	1.2	1.17	1.19	1.26	1.26	1.26	1.29	1.23	1.23	1.16	1.22	1.14	1.18	1.22	1.21	1.13	1.19	1.2	1.27	1.17	1.22	1.2	1.19	1.23	1.27
-3250	1.36	1.31	1.28	1.24	1.29	1.3	1.36	1.38	1.29	1.31	1.3	1.23	1.47	1.25	1.28	1.29	1.26	1.32	1.19	1.26	1.27	1.25	1.23	1.26	1.26	1.23	1.21	1.34	1.26	1.29	1.28	1.26	1.32	1.21	1.24	1.21	1.19	1.26	1.25	1.15	1.19	1.21	1.25	1.22	1.23	1.19	1.16	1.23	1.36
-3000	1.34	1.27	1.32	1.26	1.35	1.34	1.41	1.37	1.27	1.33	1.34	1.28	1.37	1.31	1.28	1.25	1.3	1.28	1.17	1.27	1.29	1.23	1.33	1.25	1.27	1.26	1.25	1.34	1.28	1.33	1.31	1.25	1.23	1.22	1.25	1.17	1.21	1.28	1.23	1.23	1.23	1.23	1.21	1.2	1.26	1.27	1.22	1.25	1.42
-2750	1.4	1.33	1.38	1.32	1.32	1.32	1.43	1.39	1.31	1.36	1.36	1.3	1.32	1.36	1.36	1.25	1.23	1.33	1.21	1.3	1.31	1.26	1.35	1.25	1.26	1.28	1.29	1.33	1.23	1.32	1.26	1.24	1.28	1.26	1.33	1.25	1.28	1.27	1.2	1.27	1.25	1.29	1.24	1.22	1.27	1.26	1.18	1.22	1.32
-2500	1.4	1.35	1.37	1.34	1.35	1.35	1.46	1.44	1.34	1.39	1.36	1.32	1.34	1.48	1.38	1.38	1.32	1.34	1.29	1.33	1.31	1.28	1.38	1.28	1.3	1.31	1.29	1.34	1.3	1.36	1.35	1.25	1.35	1.37	1.35	1.3	1.28	1.33	1.29	1.24	1.26	1.29	1.29	1.26	1.28	1.27	1.2	1.23	1.33
-2250	1.43	1.4	1.43	1.37	1.43	1.37	1.41	1.45	1.35	1.4	1.41	1.39	1.36	1.4	1.35	1.35	1.33	1.36	1.31	1.36	1.28	1.29	1.4	1.34	1.3	1.29	1.28	1.33	1.23	1.37	1.42	1.38	1.32	1.31	1.39	1.31	1.26	1.31	1.28	1.28	1.25	1.3	1.27	1.31	1.34	1.32	1.21	1.29	1.33
-2000	1.47	1.42	1.47	1.4	1.39	1.39	1.45	1.47	1.37	1.43	1.36	1.41	1.37	1.32	1.36	1.44	1.33	1.33	1.28	1.37	1.3	1.32	1.31	1.38	1.3	1.35	1.31	1.37	1.24	1.37	1.42	1.38	1.33	1.34	1.45	1.33	1.33	1.32	1.31	1.33	1.31	1.31	1.28	1.31	1.3	1.35	1.26	1.28	1.39
-1750	1.56	1.47	1.54	1.4	1.42	1.42	1.39	1.48	1.38	1.45	1.45	1.4	1.35	1.44	1.31	1.39	1.39	1.33	1.28	1.43	1.36	1.34	1.38	1.41	1.34	1.33	1.26	1.42	1.24	1.37	1.41	1.42	1.38	1.35	1.42	1.32	1.36	1.35	1.41	1.43	1.33	1.33	1.29	1.35	1.27	1.34	1.29	1.3	1.35
-1500	1.5	1.46	1.54	1.44	1.46	1.43	1.4	1.51	1.4	1.45	1.45	1.41	1.39	1.43	1.37	1.39	1.37	1.32	1.34	1.41	1.38	1.4	1.37	1.35	1.35	1.33	1.35	1.41	1.3	1.33	1.4	1.33	1.34	1.33	1.42	1.31	1.31	1.46	1.34	1.42	1.36	1.36	1.32	1.31	1.31	1.37	1.25	1.37	1.31
-1250	1.45	1.51	1.51	1.45	1.47	1.48	1.45	1.47	1.44	1.45	1.42	1.44	1.37	1.46	1.39	1.39	1.37	1.39	1.36	1.44	1.43	1.46	1.37	1.37	1.33	1.33	1.42	1.39	1.26	1.3	1.33	1.3	1.4	1.32	1.39	1.37	1.31	1.4	1.31	1.41	1.39	1.3	1.33	1.31	1.34	1.41	1.27	1.3	1.35
-1000	1.49	1.5	1.49	1.47	1.41	1.45	1.44	1.41	1.41	1.49	1.4	1.52	1.35	1.46	1.41	1.39	1.41	1.45	1.37	1.42	1.38	1.43	1.41	1.44	1.39	1.34	1.42	1.39	1.31	1.28	1.34	1.38	1.4	1.32	1.45	1.39	1.35	1.38	1.33	1.41	1.44	1.31	1.31	1.37	1.35	1.39	1.28	1.32	1.38
-750	1.51	1.46	1.54	1.52	1.45	1.41	1.39	1.46	1.38	1.48	1.41	1.51	1.37	1.42	1.46	1.43	1.47	1.38	1.38	1.42	1.4	1.44	1.4	1.44	1.38	1.4	1.41	1.45	1.32	1.35	1.39	1.49	1.39	1.35	1.44	1.4	1.39	1.34	1.32	1.32	1.39	1.39	1.37	1.35	1.36	1.37	1.3	1.31	1.46
-500	1.46	1.5	1.6	1.57	1.44	1.47	1.42	1.54	1.44	1.48	1.46	1.48	1.38	1.42	1.47	1.46	1.52	1.34	1.39	1.46	1.4	1.44	1.38	1.34	1.43	1.4	1.4	1.42	1.39	1.38	1.36	1.42	1.35	1.38	1.36	1.36	1.36	1.38	1.37	1.35	1.37	1.47	1.47	1.39	1.43	1.41	1.34	1.36	1.43
-250	1.47	1.46	1.56	1.58	1.5	1.58	1.45	1.53	1.42	1.53	1.51	1.52	1.45	1.43	1.55	1.48	1.56	1.41	1.4	1.44	1.44	1.5	1.43	1.38	1.49	1.38	1.33	1.41	1.46	1.32	1.39	1.53	1.48	1.37	1.41	1.42	1.4	1.44	1.4	1.38	1.36	1.54	1.49	1.41	1.43	1.48	1.33	1.38	1.48
Midpoint	1.56	1.46	1.5	1.67	1.58	1.63	1.51	1.54	1.48	1.58	1.6	1.53	1.4	1.4	1.57	1.52	1.49	1.48	1.41	1.45	1.47	1.54	1.47	1.45	1.49	1.39	1.34	1.4	1.41	1.41	1.37	1.55	1.45	1.45	1.45	1.43	1.48	1.44	1.44	1.48	1.37	1.48	1.51	1.45	1.41	1.52	1.33	1.42	1.49
250	1.57	1.51	1.57	1.55	1.53	1.55	1.44	1.44	1.46	1.59	1.51	1.54	1.38	1.47	1.51	1.53	1.49	1.49	1.39	1.45	1.44	1.48	1.45	1.43	1.46	1.44	1.39	1.42	1.49	1.42	1.43	1.46	1.34	1.46	1.48	1.43	1.49	1.41	1.43	1.48	1.39	1.37	1.4	1.41	1.29	1.38	1.37	1.4	1.4
500	1.53	1.57	1.47	1.47	1.5	1.54	1.48	1.46	1.41	1.47	1.52	1.48	1.38	1.49	1.38	1.51	1.5	1.48	1.26	1.48	1.46	1.41	1.42	1.4	1.45	1.35	1.36	1.4	1.43	1.37	1.39	1.43	1.42	1.4	1.4	1.47	1.38	1.34	1.44	1.46	1.37	1.35	1.3	1.37	1.3	1.36	1.46	1.33	1.38
750	1.51	1.58	1.45	1.52	1.48	1.48	1.42	1.5	1.44	1.52	1.52	1.52	1.44	1.5	1.45	1.44	1.5	1.4	1.24	1.38	1.39	1.43	1.4	1.32	1.41	1.36	1.39	1.42	1.32	1.36	1.42	1.34	1.38	1.32	1.3	1.43	1.34	1.34	1.28	1.42	1.37	1.34	1.31	1.3	1.3	1.34	1.39	1.33	1.37
1000	1.51	1.52	1.44	1.49	1.49	1.48	1.45	1.47	1.44	1.53	1.58	1.45	1.44	1.46	1.37	1.39	1.43	1.43	1.21	1.34	1.37	1.42	1.43	1.36	1.42	1.38	1.37	1.43	1.3	1.34	1.36	1.34	1.35	1.38	1.38	1.35	1.34	1.39	1.36	1.42	1.37	1.36	1.3	1.33	1.31	1.36	1.34	1.36	1.38
1250	1.49	1.49	1.41	1.48	1.48	1.44	1.39	1.42	1.39	1.5	1.57	1.41	1.41	1.35	1.39	1.36	1.41	1.42	1.24	1.37	1.36	1.37	1.44	1.39	1.44	1.43	1.43	1.34	1.4	1.42	1.32	1.39	1.36	1.38	1.42	1.34	1.35	1.33	1.43	1.41	1.42	1.36	1.27	1.36	1.32	1.39	1.36	1.34	1.36
1500	1.46	1.56	1.43	1.46	1.51	1.39	1.4	1.4	1.42	1.44	1.5	1.39	1.43	1.35	1.38	1.39	1.4	1.43	1.28	1.37	1.3	1.43	1.38	1.47	1.37	1.39	1.39	1.35	1.39	1.36	1.31	1.39	1.33	1.38	1.44	1.33	1.28	1.31	1.37	1.36	1.34	1.39	1.3	1.34	1.3	1.37	1.36	1.31	1.36
1750	1.49	1.55	1.45	1.42	1.51	1.37	1.39	1.39	1.41	1.43	1.48	1.38	1.38	1.36	1.37	1.4	1.41	1.37	1.26	1.42	1.29	1.35	1.32	1.4	1.35	1.37	1.42	1.39	1.38	1.32	1.31	1.32	1.37	1.35	1.37	1.37	1.28	1.27	1.35	1.32	1.37	1.37	1.27	1.3	1.29	1.32	1.3	1.27	1.42
2000	1.47	1.5	1.54	1.42	1.4	1.38	1.39	1.37	1.37	1.47	1.44	1.36	1.36	1.33	1.4	1.4	1.41	1.38	1.36	1.35	1.32	1.4	1.35	1.42	1.39	1.34	1.36	1.37	1.39	1.33	1.34	1.3	1.34	1.31	1.41	1.36	1.29	1.28	1.32	1.29	1.43	1.34	1.29	1.25	1.25	1.3	1.35	1.27	1.35
2250	1.44	1.47	1.44	1.46	1.37	1.42	1.34	1.36	1.37	1.37	1.36	1.4	1.34	1.36	1.35	1.39	1.32	1.36	1.35	1.35	1.41	1.47	1.35	1.37	1.34	1.34	1.32	1.36	1.32	1.31	1.31	1.3	1.32	1.32	1.39	1.32	1.29	1.27	1.31	1.34	1.36	1.28	1.29	1.04	1.29	1.26	1.31	1.26	1.32
2500	1.42	1.41	1.46	1.38	1.43	1.49	1.36	1.36	1.37	1.34	1.36	1.41	1.32	1.37	1.34	1.35	1.35	1.36	1.3	1.35	1.39	1.33	1.27	1.34	1.32	1.34	1.31	1.32	1.32	1.36	1.3	1.27	1.31	1.33	1.32	1.34	1.28	1.26	1.32	1.28	1.29	1.25	1.31	1.31	1.28	1.27	1.35	1.26	1.31
2750	1.45	1.4	1.4	1.41	1.41	1.44	1.34	1.37	1.44	1.27	1.3	1.3	1.29	1.35	1.34	1.32	1.34	1.37	1.3	1.33	1.39	1.28	1.24	1.3	1.31	1.33	1.31	1.28	1.31	1.35	1.24	1.26	1.37	1.3	1.3	1.3	1.24	1.29	1.3	1.29	1.28	1.31	1.28	1.24	1.24	1.23	1.38	1.28	1.28
3000	1.46	1.4	1.36	1.35	1.38	1.38	1.3	1.27	1.39	1.25	1.28	1.31	1.25	1.34	1.28	1.29	1.26	1.35	1.39	1.42	1.32	1.3	1.19	1.21	1.28	1.32	1.34	1.26	1.24	1.31	1.19	1.27	1.28	1.28	1.28	1.33	1.24	1.24	1.26	1.26	1.24	1.21	1.25	1.26	1.28	1.2	1.3	1.23	1.3
3250	1.35	1.39	1.37	1.3	1.35	1.31	1.25	1.28	1.36	1.24	1.22	1.28	1.25	1.39	1.27	1.34	1.26	1.32	1.42	1.39	1.3	1.26	1.16	1.2	1.21	1.28	1.31	1.17	1.26	1.25	1.2	1.24	1.23	1.26	1.1	1.27	1.23	1.2	1.27	1.17	1.2	1.18	1.22	1.28	1.29	1.22	1.24	1.24	1.3
3500	1.32	1.35	1.34	1.26	1.36	1.24	1.32	1.26	1.32	1.27	1.2	1.24	1.21	1.31	1.28	1.34	1.27	1.26	1.47	1.39	1.24	1.24	1.2	1.21	1.26	1.26	1.3	1.16	1.31	1.22	1.17	1.19	1.15	1.31	1.06	1.24	1.22	1.21	1.22	1.19	1.26	1.15	1.2	1.2	1.19	1.18	1.27	1.16	1.26
3750	1.3	1.36	1.26	1.22	1.32	1.19	1.31	1.18	1.29	1.23	1.16	1.25	1.2	1.23	1.25	1.16	1.2	1.19	1.37	1.33	1.21	1.24	1.18	1.22	1.22	1.2	1.24	1.13	1.23	1.19	1.12	1.2	1.17	1.23	1.06	1.19	1.24	1.16	1.2	1.24	1.18	1.12	1.19	1.18	1.19	1.14	1.23	1.07	1.32
4000	1.3	1.32	1.2	1.28	1.22	1.18	1.23	1.17	1.25	1.16	1.1	1.23	1.15	1.22	1.18	1.25	1.16	1.12	1.32	1.18	1.19	1.21	1.12	1.19	1.24	1.16	1.19	1.13	1.2	1.15	1.09	1.17	1.1	1.21	1.05	1.21	1.21	1.15	1.19	1.16	1.16	1.1	1.15	1.19	1.21	1.1	1.19	1.04	0
4250	1.23	1.33	1.19	1.28	1.22	1.19	1.21	1.12	1.28	1.15	1.08	1.2	1.12	1.18	1.2	1.23	1.18	1.11	1.34	1.17	1.21	1.08	1.09	1.17	1.16	1.18	1.2	1.08	1.18	1.12	1.07	1.14	1.04	1.17	1.07	1.2	1.17	1.18	1.17	1.13	1.1	1.08	1.12	1.16	1.1	1.06	1.11	1.09	0
4500	1.24	1.2	1.11	1.24	1.24	1.14	1.16	1.09	1.24	1.13	1.04	1.1	1.09	1.16	1.19	1.21	1.18	1.09	1.36	1.15	1.17	1.05	1.1	1.13	1.12	1.18	1.17	1.1	1.09	1.14	1.07	1.1	1.09	1.09	1.04	1.15	1.17	1.11	1.15	1.09	1.1	1.06	1.09	1.18	1.1	1.01	1.1	1.11	0.96
4750	1.24	1.2	1.1	1.16	1.19	1.09	1.09	1.04	1.17	1.12	1.06	1.15	1.06	1.12	1.11	1.18	1.15	1.08	1.37	1.09	1.17	1.05	1.13	1.13	1.09	1.12	1.12	1.07	1.09	1.09	1.04	1.09	1.05	1.08	1.03	1.06	1.12	1.12	1.08	1.08	1.09	1.07	1.13	1.13	1.05	1.02	1.12	1.08	0.97
5000	1.18	1.09	1.09	1.1	1.15	1.09	1.09	1.03	1.14	1.09	1.03	1.07	1.04	1.07	1.06	1.18	1.11	1.02	1.35	1.04	1.16	1.03	1.07	1.1	1.05	1.05	1.09	1.03	1.05	1.09	0.95	1.05	1.03	1.06	0.98	1.02	1.14	1.08	1.04	1.06	1.09	1.09	1.08	1.14	1.08	0.99	1.03	1.07	0.95
[truncated: 350 more columns]

## Sheet: 156_ndbf4Cdc7_Fig2
	ARS922	ARS315	ARS1103	ARS1019	ARS305	ARS1021	ARS731.5	ARS1623	ARS1217	ARS1511	ARS1018	ARS306	ARS432.5	ARS508	ARS428	ARS1510	ARS432	ARS1529.5	ARS1014	ARS1626.5	ARS1303	ARS607	ARS820	ARS1307	ARS1332	ARS1310	ARS1218	ARS1013	ARS1012	ARS110	ARS516	ARS1513.5	ARS1223	ARS731	ARS202	ARS815	ARS415	ARS714	ARS1220	ARS511	ARS1330	ARS1614	ARS1215	ARS1109	ARS718	ARS1213	ARS518	ARS1107.5	ARS909
-5000	0.93	0.9	0.99	0.99	0.97	0.97	0.92	0.91	1.01	0.92	0.93	0.89	1.15	0.95	0.96	0.94	1	0.94	0.91	0.93	1.04	0.94	0.93	0.94	0.93	0.91	0.99	1.02	0.96	0.96	0.96	0.91	0.95	0.93	1.02	0.9	0.9	1.01	0.97	0.96	0.92	0.91	0.96	0.89	1	0.91	1.06	0.94	0.94
-4750	0.96	0.97	0.99	0.99	0.96	1.01	0.94	0.94	1.03	0.94	0.94	0.92	1.21	0.87	0.94	0.95	1.06	1	0.94	0.96	1.02	1	0.97	0.93	0.96	0.9	0.94	1.01	0.94	0.97	0.94	0.95	1	0.93	1	0.9	0.93	1.01	0.99	0.94	0.94	0.91	0.92	0.92	0.95	0.94	1.11	0.93	0.96
-4500	0.97	1.04	1.01	0.96	1.01	0.94	0.95	0.93	1.04	0.95	1	0.97	1.23	0.93	0.92	0.95	1.08	1	0.94	0.99	0.95	1.01	0.99	0.99	0.97	0.89	0.98	1.04	0.95	0.96	0.99	0.98	0.99	1.02	1.02	0.93	0.94	0.97	1.02	0.98	0.91	0.95	0.97	0.99	0.97	0.95	1.02	0.97	0.95
-4250	1.02	1	1.09	0.99	1.02	1	0.96	1	1.05	0.92	1	0.97	1.13	0.98	0.95	0.96	1.09	1.01	0.98	1.03	1.02	1.04	0.97	0.99	0.99	0.95	0.98	1.07	1	0.98	0.96	1.01	1.01	1	1.04	1	0.96	1	1.05	1.02	0.92	0.96	0.94	1.05	0.93	0.99	1	1	0.94
-4000	1.06	1.01	1.1	1	1.05	1.02	0.97	1.03	1.02	1	1.02	1.01	1.09	0.97	1.02	1.02	1.11	0.97	0.98	1.06	1.08	0.99	1.01	1	1.06	0.94	1.12	1.12	1.02	0.98	0.95	1	1.04	1.02	1.03	1.03	1	1.02	1.03	1	0.95	1.01	0.97	1.07	0.98	1.04	1.02	1	0.98
-3750	1.08	1.07	1.11	1.02	1.08	1	0.98	0.99	1.03	0.99	1.01	1.01	1.09	1	1.01	0.98	1.08	0.98	1	1.11	1.12	1.04	1	0.99	1.05	0.95	1.15	1.15	1.01	1.04	0.98	0.99	1.04	1.04	1.09	1.06	1	1.02	1.01	0.96	1	1	1.06	1.06	1.02	1.06	1.06	1.02	0.96
-3500	1.08	1.12	1.16	1.06	1.09	1.03	1	1.02	1.01	1	1.06	1.01	1.11	1.1	1.02	1.05	1.08	1	1.01	1.26	1.09	1.03	1.05	1.05	1.05	0.99	1.14	1.12	1.04	1.07	1.01	1.02	1.09	1.08	1.06	1.08	1.02	1.02	1.02	1.01	1.03	1.04	1.12	1.04	1.06	1.02	1.06	1	1
-3250	1.09	1.2	1.13	1.1	1.1	1.02	1.07	1.05	1.07	1.04	1.1	1.11	1.2	1.15	1.02	1.07	1.04	1.04	1.01	1.12	1.08	1.06	1.08	1.1	1.09	1.08	1.14	1.13	1.07	1.09	1.03	1.03	1.07	1.1	1.09	1.12	1.07	1.07	0.98	1.02	1.04	1.1	1.1	1.07	1.07	1.07	1.04	1.05	1.09
-3000	1.15	1.14	1.18	1.11	1.13	1.06	1.09	1.07	1.07	1.09	1.13	1.14	1.13	1.13	1.03	1.09	1.03	1.05	1.08	1.07	1.12	1.1	1.12	1.13	1.09	1.05	1.14	1.14	1.12	1.1	1.03	1.06	1.14	1.09	1.13	1.17	1.12	1.08	1.05	1.07	1.03	1.16	1.12	1.11	1.04	1.09	1.11	1.12	1.05
-2750	1.18	1.12	1.26	1.16	1.09	1.1	1.16	1.12	1.13	1.13	1.17	1.18	1.17	1.12	1.07	1.1	1	1.07	1.08	1.11	1.12	1.17	1.12	1.14	1.15	1.13	1.21	1.21	1.15	1.17	1.03	1.07	1.15	1.05	1.14	1.18	1.13	1.08	1.08	1.16	1.06	1.12	1.11	1.05	1.15	1.11	1.1	1.12	1.08
-2500	1.21	1.12	1.25	1.15	1.17	1.11	1.16	1.21	1.16	1.17	1.26	1.23	1.14	1.17	1.19	1.1	1.06	1.13	1.15	1.2	1.15	1.19	1.17	1.2	1.08	1.14	1.18	1.25	1.12	1.14	1.1	1.14	1.18	1.14	1.2	1.22	1.12	1.15	1.2	1.17	1.13	1.16	1.19	1.04	1.21	1.06	1.09	1.15	1.09
-2250	1.17	1.14	1.22	1.23	1.2	1.16	1.22	1.25	1.18	1.19	1.22	1.28	1.11	1.17	1.2	1.11	1.19	1.15	1.23	1.17	1.13	1.19	1.24	1.21	1.16	1.15	1.18	1.26	1.13	1.15	1.19	1.18	1.2	1.08	1.24	1.23	1.2	1.14	1.28	1.13	1.22	1.17	1.2	1.05	1.18	1.13	1.16	1.12	1.12
-2000	1.24	1.22	1.24	1.29	1.19	1.23	1.21	1.3	1.21	1.2	1.22	1.27	1.15	1.25	1.26	1.2	1.19	1.13	1.24	1.21	1.22	1.25	1.23	1.23	1.21	1.21	1.18	1.25	1.14	1.18	1.24	1.21	1.2	1.13	1.2	1.15	1.25	1.2	1.25	1.17	1.24	1.17	1.16	1.1	1.18	1.19	1.15	1.13	1.16
-1750	1.29	1.26	1.26	1.27	1.29	1.19	1.25	1.32	1.21	1.23	1.21	1.3	1.17	1.28	1.22	1.28	1.22	1.19	1.26	1.22	1.26	1.35	1.3	1.27	1.21	1.22	1.17	1.29	1.21	1.19	1.21	1.22	1.2	1.22	1.22	1.18	1.24	1.2	1.21	1.29	1.25	1.23	1.16	1.19	1.18	1.23	1.21	1.14	1.3
-1500	1.33	1.3	1.35	1.27	1.36	1.28	1.29	1.29	1.25	1.25	1.19	1.28	1.21	1.28	1.23	1.32	1.29	1.19	1.26	1.24	1.3	1.3	1.29	1.25	1.21	1.26	1.25	1.33	1.25	1.23	1.26	1.28	1.21	1.28	1.24	1.2	1.19	1.18	1.25	1.26	1.27	1.25	1.18	1.18	1.23	1.24	1.2	1.21	1.23
-1250	1.31	1.3	1.25	1.24	1.27	1.28	1.27	1.25	1.28	1.29	1.24	1.29	1.17	1.28	1.23	1.36	1.33	1.25	1.23	1.23	1.28	1.3	1.31	1.22	1.2	1.31	1.23	1.28	1.26	1.24	1.22	1.35	1.27	1.33	1.24	1.21	1.19	1.23	1.29	1.29	1.31	1.26	1.2	1.2	1.26	1.2	1.26	1.24	1.29
-1000	1.31	1.3	1.22	1.23	1.3	1.26	1.25	1.25	1.33	1.34	1.37	1.32	1.23	1.3	1.3	1.35	1.27	1.3	1.29	1.24	1.34	1.24	1.22	1.33	1.25	1.29	1.27	1.31	1.25	1.28	1.22	1.38	1.3	1.31	1.27	1.24	1.27	1.22	1.27	1.22	1.29	1.29	1.28	1.22	1.2	1.24	1.24	1.22	1.29
-750	1.31	1.35	1.3	1.29	1.28	1.29	1.25	1.28	1.32	1.29	1.33	1.32	1.27	1.32	1.31	1.29	1.3	1.33	1.31	1.33	1.23	1.26	1.23	1.28	1.21	1.28	1.28	1.33	1.29	1.29	1.24	1.37	1.34	1.27	1.31	1.27	1.3	1.22	1.24	1.23	1.25	1.24	1.31	1.19	1.23	1.24	1.24	1.19	1.33
-500	1.31	1.34	1.3	1.31	1.39	1.37	1.31	1.31	1.29	1.38	1.29	1.34	1.3	1.4	1.31	1.34	1.36	1.31	1.38	1.32	1.28	1.3	1.25	1.28	1.27	1.32	1.33	1.29	1.33	1.28	1.25	1.3	1.29	1.29	1.28	1.32	1.25	1.24	1.24	1.25	1.34	1.3	1.35	1.22	1.29	1.26	1.27	1.26	1.5
-250	1.36	1.32	1.3	1.33	1.38	1.38	1.38	1.37	1.28	1.36	1.27	1.34	1.26	1.44	1.37	1.3	1.34	1.36	1.41	1.41	1.32	1.33	1.26	1.33	1.25	1.31	1.31	1.25	1.28	1.44	1.35	1.32	1.31	1.3	1.34	1.3	1.31	1.31	1.29	1.3	1.32	1.33	1.42	1.22	1.31	1.36	1.32	1.29	1.56
Midpoint	1.49	1.36	1.32	1.33	1.4	1.35	1.47	1.48	1.34	1.41	1.27	1.37	1.37	1.44	1.43	1.41	1.38	1.37	1.35	1.38	1.38	1.36	1.35	1.42	1.37	1.38	1.3	1.22	1.31	1.51	1.33	1.38	1.32	1.35	1.35	1.29	1.26	1.35	1.29	1.31	1.33	1.36	1.4	1.29	1.32	1.4	1.31	1.33	1.43
250	1.42	1.44	1.29	1.41	1.43	1.41	1.41	1.35	1.37	1.41	1.35	1.28	1.35	1.37	1.5	1.37	1.24	1.38	1.4	1.3	1.39	1.34	1.37	1.38	1.34	1.37	1.3	1.3	1.33	1.42	1.35	1.33	1.24	1.28	1.36	1.3	1.31	1.35	1.25	1.26	1.35	1.28	1.36	1.3	1.35	1.38	1.3	1.33	1.32
500	1.45	1.35	1.31	1.33	1.38	1.41	1.34	1.36	1.29	1.36	1.33	1.29	1.32	1.35	1.37	1.39	1.11	1.37	1.36	1.3	1.31	1.39	1.32	1.33	1.3	1.29	1.36	1.27	1.29	1.27	1.34	1.24	1.24	1.27	1.3	1.28	1.27	1.3	1.23	1.33	1.33	1.26	1.25	1.34	1.33	1.35	1.25	1.32	1.2
750	1.43	1.32	1.29	1.31	1.33	1.38	1.31	1.29	1.27	1.34	1.32	1.33	1.33	1.31	1.35	1.39	1.08	1.38	1.35	1.29	1.24	1.31	1.32	1.21	1.26	1.26	1.28	1.33	1.25	1.25	1.32	1.19	1.24	1.29	1.26	1.3	1.19	1.35	1.24	1.26	1.33	1.29	1.29	1.25	1.27	1.3	1.2	1.28	1.16
1000	1.42	1.28	1.27	1.33	1.28	1.32	1.29	1.31	1.27	1.39	1.29	1.39	1.32	1.3	1.25	1.31	1.04	1.28	1.3	1.25	1.3	1.29	1.28	1.27	1.29	1.29	1.24	1.21	1.22	1.24	1.31	1.22	1.25	1.26	1.23	1.27	1.24	1.3	1.21	1.22	1.26	1.24	1.33	1.28	1.3	1.27	1.17	1.23	1.19
1250	1.37	1.31	1.29	1.3	1.29	1.34	1.31	1.28	1.28	1.4	1.33	1.39	1.24	1.26	1.2	1.3	1.09	1.28	1.29	1.27	1.3	1.29	1.26	1.27	1.31	1.3	1.2	1.17	1.3	1.22	1.28	1.23	1.2	1.27	1.21	1.27	1.29	1.24	1.19	1.25	1.25	1.25	1.33	1.3	1.27	1.31	1.2	1.26	1.21
1500	1.33	1.27	1.27	1.26	1.31	1.32	1.25	1.28	1.23	1.32	1.22	1.32	1.23	1.22	1.31	1.2	1.12	1.23	1.26	1.25	1.28	1.31	1.24	1.24	1.35	1.26	1.21	1.16	1.27	1.21	1.23	1.3	1.22	1.29	1.17	1.25	1.33	1.3	1.22	1.2	1.24	1.28	1.27	1.27	1.23	1.24	1.2	1.22	1.18
1750	1.3	1.21	1.28	1.33	1.27	1.29	1.28	1.24	1.22	1.28	1.22	1.24	1.2	1.26	1.23	1.18	1.15	1.21	1.22	1.2	1.23	1.31	1.25	1.26	1.28	1.2	1.25	1.19	1.33	1.2	1.26	1.29	1.23	1.27	1.18	1.25	1.26	1.27	1.25	1.16	1.26	1.26	1.22	1.24	1.24	1.19	1.15	1.18	1.19
2000	1.28	1.22	1.22	1.25	1.23	1.26	1.21	1.29	1.29	1.23	1.21	1.24	1.14	1.19	1.22	1.19	1.21	1.2	1.2	1.14	1.19	1.24	1.27	1.2	1.26	1.22	1.18	1.1	1.21	1.21	1.24	1.24	1.25	1.23	1.13	1.21	1.14	1.25	1.19	1.19	1.21	1.21	1.17	1.3	1.26	1.12	1.19	1.22	1.16
2250	1.26	1.24	1.19	1.22	1.23	1.29	1.22	1.26	1.26	1.15	1.21	1.16	1.14	1.24	1.22	1.17	1.23	1.16	1.13	1.11	1.2	1.16	1.25	1.19	1.22	1.18	1.2	1.11	1.17	1.14	1.22	1.21	1.2	1.26	1.06	1.18	0.99	1.2	1.2	1.23	1.21	1.18	1.13	1.22	1.19	1.15	1.19	1.17	1.22
2500	1.22	1.26	1.2	1.21	1.27	1.28	1.3	1.2	1.18	1.16	1.21	1.17	1.12	1.17	1.16	1.19	1.13	1.21	1.15	1.13	1.12	1.21	1.21	1.14	1.23	1.13	1.17	1.07	1.16	1.12	1.22	1.18	1.13	1.21	1.06	1.21	1.21	1.14	1.23	1.15	1.16	1.1	1.12	1.2	1.16	1.1	1.15	1.23	1.14
2750	1.2	1.3	1.15	1.26	1.2	1.28	1.22	1.17	1.09	1.14	1.2	1.15	1.06	1.12	1.14	1.19	1.09	1.15	1.16	1.11	1.11	1.05	1.14	1.1	1.18	1.2	1.14	1.05	1.19	1.16	1.17	1.1	1.12	1.13	1.07	1.14	1.16	1.1	1.13	1.15	1.12	1.14	1.11	1.19	1.11	1.11	1.1	1.11	1.13
3000	1.21	1.21	1.15	1.2	1.11	1.22	1.12	1.14	1.08	1.11	1.21	1.08	1.08	1.13	1.15	1.21	1.09	1.12	1.11	1.03	1.05	1	1.05	1.13	1.12	1.23	1.07	1.02	1.1	1.12	1.22	1.09	1.05	1.11	1.03	1.13	1.2	1.12	1.18	1.11	1.07	1.07	1.06	1.15	1.02	1.1	1.02	1.09	1.1
3250	1.14	1.16	1.12	1.14	1.07	1.18	1.14	1.06	1.07	1.04	1.19	1.06	1.06	1.06	1.13	1.08	1.11	1.07	1.06	1.03	1.03	1.03	1.05	1.05	1.12	1.2	1.02	0.99	1.11	1.09	1.16	1.09	1.04	1.06	1.02	1.05	1.13	1.08	1.2	1.11	1.05	1.04	1.05	1.12	0.98	1.11	1.02	1.09	1.03
3500	1.09	1.08	1.1	1.11	1.07	1.1	1.1	1.06	1.08	1.06	1.08	1	1.03	1.03	1.06	1.07	1.2	1.06	1.05	1.08	0.98	1.02	1.12	0.99	1.17	1.15	0.99	1.02	1.07	1.03	1.08	1.06	1.05	1.03	1.05	1.05	1.04	1.05	1.03	1.08	1.04	1.02	1.03	1.05	1.06	1	1.04	1.06	1.01
3750	1.12	1.04	1.09	1.07	1.03	1.06	1.1	1	1.1	1.01	1.05	0.97	1.01	0.99	1.01	1.06	1.13	1.03	0.99	1.09	0.99	0.98	1.06	1.02	1.05	1.14	0.97	0.98	1.05	1.02	1.01	1.05	1.05	1.01	1.05	1.07	1.02	1.04	1.02	1.05	1.01	0.99	1.01	1.1	1.03	1.01	1.07	1.07	1
4000	1.1	1.08	1.09	1.03	1.03	1.03	1.02	1.01	1.05	1.05	1	1.03	1.02	0.98	0.98	0.99	1.17	1.07	1.01	1.05	1	0.95	0.97	1.05	0.96	1.03	0.96	0.99	1.02	1.02	1.05	1	1.02	1.03	0.99	0.98	1.06	1	1	1.06	1.02	0.99	0.96	1.06	0.98	0.98	0.99	1.03	0.98
4250	1	1.04	1.05	1.05	1.01	0.95	1.01	1	1.03	1.04	0.99	0.98	0.99	0.96	1.03	0.97	1.14	1.11	1.02	1.04	0.99	0.99	0.98	1.05	0.93	1.05	0.96	1	0.99	1	1.08	0.94	1.03	0.96	0.97	0.97	1.06	0.96	0.97	1	0.97	0.98	0.93	1.04	0.96	1.02	0.99	1.03	1
4500	0.98	0.99	0.97	1.02	0.95	0.97	1.05	0.97	1.02	1	0.96	0.96	0.92	0.95	1.03	0.95	1.11	1.08	1.01	0.98	0.99	0.97	0.94	0.98	0.95	0.94	0.95	1	1.02	0.96	1	0.96	1.01	0.96	1	0.93	1.05	0.96	0.94	1.01	0.97	1.01	0.93	0.97	0.95	1.01	1.05	1.02	0.93
4750	0.98	0.95	0.94	1.04	0.97	0.95	1.02	0.96	1.05	0.98	0.94	0.93	0.93	0.93	1	0.98	1.15	1.02	1.03	1	0.99	0.94	0.96	0.97	0.99	0.96	1	0.97	0.98	0.96	0.91	0.99	0.97	0.94	1.03	0.94	1.03	0.93	0.96	0.98	0.98	1.02	0.88	0.94	0.96	0.98	1.04	0.99	0.92
5000	0.99	0.96	0.93	0.99	0.95	0.92	0.99	0.94	0.99	0.96	0.96	0.93	0.94	0.96	0.98	0.93	1.17	1.02	1.04	0.94	0.93	0.89	0.98	0.96	0.96	0.94	0.98	0.9	0.99	0.97	0.92	0.97	0.97	0.95	1.07	0.91	1	0.93	0.94	0.97	0.91	0.95	0.89	0.95	0.98	0.91	1	0.96	0.95
[truncated: 350 more columns]

## Sheet: 145_WT_Fig3
	ARS1330	ARS1021	ARS1529.5	ARS922	ARS1511	ARS305	ARS428	ARS731.5	ARS508	ARS110	ARS432.5	ARS418	ARS1213	ARS1114	ARS306	ARS1218	ARS432	ARS607	ARS1211	ARS1310	ARS1019	ARS1014	ARS202	ARS1103	ARS1018	ARS720	ARS208	ARS731	ARS1309	ARS1510	ARS606	ARS307	ARS1513	ARS511	ARS1012	ARS815	ARS1113.5	ARS1107.5	ARS209	ARS1013	ARS1332	ARS510	ARS913	ARS719	ARS1217	ARS415	ARS1303	ARS516	ARS108
-5000	1.22	1.15	1.2	1.22	1.27	1.16	1.19	1.11	1.19	1.17	1.22	1.17	1.19	1.15	1.21	0.98	1.12	1.23	1.14	1.21	1.07	1.17	1.21	1.03	1.13	1.09	1.16	1.14	1.18	1.08	1.14	1.12	1.11	1.1	1.1	1.12	0.87	1.14	1.17	1.19	1.07	1.1	1.09	1.06	1.09	1.14	1.06	1.15	1.07
-4750	1.27	1.15	1.26	1.23	1.23	1.27	1.23	1.17	1.19	1.12	1.24	1.17	1.2	1.17	1.18	0.92	1.18	1.18	1.2	1.16	1.14	1.22	1.19	1.07	1.13	1.14	1.17	1.11	1.15	1.05	1.18	1.14	1.11	1.09	1.14	1.13	0.86	1.14	1.14	1.17	1.12	1.12	1.13	1.11	1.11	1.13	1.06	1.17	1.08
-4500	1.35	1.14	1.27	1.25	1.23	1.26	1.16	1.19	1.21	1.1	1.32	1.16	1.25	1.2	1.2	0.86	1.19	1.22	1.21	1.1	1.13	1.2	1.28	0.99	1.16	1.13	1.22	1.1	1.12	1.11	1.17	1.14	1.13	1.13	1.17	1.16	0.85	1.15	1.18	1.17	1.25	1.15	1.09	1.18	1.1	1.15	1.14	1.19	1.06
-4250	1.31	1.15	1.28	1.22	1.24	1.25	1.21	1.23	1.22	1.18	1.28	1.2	1.2	1.18	1.2	0.8	1.2	1.24	1.03	1.16	1.22	1.21	1.25	1.04	1.26	1.11	1.24	1.14	1.14	1.19	1.18	1.13	1.11	1.07	1.2	1.15	0.91	1.16	1.26	1.18	1.25	1.22	1.03	1.22	1.11	1.16	1.17	1.17	1.07
-4000	1.28	1.21	1.26	1.21	1.23	1.25	1.26	1.18	1.19	1.22	1.32	1.21	1.15	1.17	1.27	1.09	1.2	1.26	1.1	1.21	1.23	1.21	1.2	1.11	1.27	1.17	1.19	1.16	1.11	1.2	1.2	1.17	1.11	1.12	1.19	1.15	1.01	1.15	1.21	1.21	1.23	1.17	1.07	1.23	1.13	1.19	1.12	1.16	1.07
-3750	1.23	1.28	1.29	1.21	1.24	1.32	1.24	1.24	1.21	1.26	1.32	1.29	1.1	1.22	1.26	1.19	1.23	1.3	1.16	1.2	1.19	1.18	1.18	1.14	1.22	1.18	1.15	1.2	1.13	1.21	1.16	1.19	1.16	1.16	1.17	1.18	1.02	1.16	1.23	1.19	1.23	1.18	1.09	1.24	1.2	1.16	1.09	1.17	1.09
-3500	1.32	1.27	1.31	1.27	1.3	1.36	1.28	1.29	1.29	1.27	1.31	1.31	1.19	1.23	1.26	1.17	1.18	1.27	1.22	1.25	1.18	1.19	1.17	1.22	1.24	1.17	1.19	1.21	1.16	1.21	1.18	1.2	1.18	1.2	1.17	1.18	1.07	1.2	1.22	1.21	1.24	1.21	1.14	1.22	1.23	1.26	1.17	1.19	1.13
-3250	1.31	1.33	1.34	1.31	1.29	1.35	1.34	1.29	1.27	1.34	1.31	1.28	1.25	1.29	1.27	1.22	1.13	1.23	1.28	1.26	1.17	1.18	1.21	1.3	1.24	1.24	1.24	1.23	1.22	1.21	1.28	1.2	1.19	1.15	1.18	1.2	1.13	1.16	1.23	1.23	1.31	1.15	1.18	1.23	1.21	1.17	1.22	1.18	1.13
-3000	1.3	1.3	1.33	1.32	1.35	1.35	1.38	1.32	1.28	1.31	1.31	1.29	1.3	1.25	1.27	1.28	1.21	1.21	1.24	1.22	1.18	1.22	1.23	1.27	1.22	1.21	1.25	1.25	1.24	1.22	1.23	1.21	1.14	1.22	1.21	1.13	1.15	1.21	1.26	1.24	1.26	1.14	1.19	1.18	1.18	1.21	1.24	1.16	1.12
-2750	1.32	1.28	1.31	1.34	1.33	1.33	1.37	1.33	1.3	1.27	1.28	1.28	1.37	1.27	1.27	1.3	1.22	1.27	1.26	1.25	1.29	1.23	1.17	1.21	1.16	1.2	1.23	1.29	1.2	1.28	1.22	1.22	1.14	1.23	1.19	1.15	1.13	1.18	1.31	1.25	1.24	1.12	1.18	1.13	1.16	1.22	1.18	1.2	1.16
-2500	1.36	1.33	1.33	1.35	1.33	1.33	1.33	1.31	1.32	1.31	1.29	1.25	1.33	1.26	1.32	1.32	1.27	1.31	1.25	1.19	1.29	1.28	1.2	1.2	0.98	1.21	1.23	1.28	1.27	1.26	1.25	1.24	1.21	1.21	1.21	1.22	1.13	1.16	1.32	1.28	1.27	1.19	1.13	1.11	1.18	1.18	1.21	1.16	1.16
-2250	1.38	1.34	1.34	1.29	1.35	1.29	1.35	1.28	1.33	1.36	1.33	1.29	1.32	1.32	1.34	1.36	1.28	1.35	1.26	1.2	1.25	1.3	1.25	1.33	0.91	1.24	1.31	1.29	1.28	1.25	1.25	1.28	1.21	1.22	1.23	1.23	1.13	1.17	1.33	1.25	1.28	1.29	1.17	1.15	1.2	1.25	1.18	1.21	1.21
-2000	1.37	1.31	1.33	1.3	1.39	1.3	1.42	1.29	1.29	1.37	1.28	1.25	1.32	1.28	1.32	1.34	1.3	1.33	1.26	1.24	1.25	1.26	1.23	1.26	1.08	1.28	1.26	1.3	1.32	1.25	1.26	1.2	1.23	1.18	1.24	1.24	1.15	1.19	1.27	1.25	1.24	1.23	1.22	1.19	1.22	1.26	1.21	1.22	1.18
-1750	1.32	1.38	1.33	1.36	1.33	1.22	1.37	1.23	1.3	1.32	1.3	1.31	1.36	1.31	1.35	1.32	1.34	1.35	1.29	1.23	1.25	1.23	1.25	1.29	1.22	1.25	1.23	1.26	1.25	1.21	1.22	1.26	1.26	1.27	1.25	1.25	1.17	1.23	1.3	1.26	1.22	1.19	1.22	1.22	1.22	1.26	1.26	1.22	1.21
-1500	1.36	1.4	1.34	1.38	1.36	1.32	1.33	1.34	1.29	1.36	1.28	1.33	1.45	1.28	1.31	1.32	1.29	1.4	1.29	1.28	1.32	1.28	1.31	1.31	1.23	1.26	1.28	1.22	1.27	1.23	1.19	1.25	1.25	1.23	1.28	1.21	1.2	1.22	1.32	1.27	1.28	1.13	1.21	1.25	1.2	1.27	1.19	1.22	1.23
-1250	1.32	1.45	1.35	1.42	1.34	1.4	1.3	1.32	1.33	1.37	1.32	1.31	1.42	1.32	1.32	1.36	1.3	1.42	1.26	1.34	1.34	1.25	1.32	1.27	1.29	1.29	1.32	1.2	1.3	1.28	1.23	1.25	1.25	1.27	1.25	1.19	1.18	1.26	1.35	1.27	1.26	1.28	1.31	1.29	1.19	1.24	1.21	1.26	1.23
-1000	1.35	1.43	1.29	1.39	1.33	1.42	1.26	1.36	1.31	1.37	1.34	1.32	1.44	1.22	1.35	1.39	1.29	1.37	1.34	1.37	1.33	1.21	1.32	1.25	1.3	1.25	1.37	1.23	1.33	1.25	1.28	1.32	1.22	1.2	1.25	1.21	1.17	1.26	1.35	1.37	1.26	1.31	1.3	1.32	1.15	1.21	1.25	1.19	1.2
-750	1.42	1.44	1.33	1.39	1.35	1.37	1.35	1.4	1.38	1.36	1.29	1.36	1.43	1.28	1.38	1.39	1.28	1.36	1.33	1.32	1.29	1.19	1.31	1.3	1.25	1.3	1.27	1.27	1.36	1.23	1.3	1.34	1.3	1.25	1.26	1.22	1.22	1.28	1.34	1.26	1.25	1.25	1.3	1.23	1.2	1.14	1.27	1.19	1.29
-500	1.42	1.42	1.37	1.4	1.34	1.35	1.38	1.42	1.38	1.25	1.33	1.4	1.39	1.37	1.35	1.35	1.32	1.36	1.34	1.27	1.32	1.3	1.27	1.32	1.29	1.3	1.29	1.23	1.31	1.24	1.28	1.29	1.26	1.3	1.27	1.25	1.23	1.27	1.38	1.24	1.25	1.3	1.29	1.25	1.19	0.99	1.23	1.21	1.29
-250	1.43	1.33	1.37	1.36	1.35	1.34	1.32	1.34	1.22	1.25	1.33	1.42	1.34	1.26	1.33	1.37	1.3	1.38	1.33	1.34	1.33	1.18	1.25	1.38	1.31	1.24	1.31	1.21	1.32	1.25	1.29	1.23	1.24	1.27	1.27	1.27	1.29	1.17	1.34	1.24	1.24	1.24	1.28	1.26	1.23	1.07	1.2	1.19	1.27
Midpoint	1.41	1.38	1.3	1.35	1.27	1.25	1.31	1.34	1.28	1.17	1.31	1.26	1.26	1.17	1.3	1.38	1.25	1.3	1.33	1.37	1.29	1.17	1.25	1.34	1.3	1.19	1.27	1.31	1.28	1.25	1.19	1.21	1.24	1.27	1.37	1.27	1.25	1.14	1.28	1.21	1.21	1.24	1.19	1.25	1.23	1.14	1.14	1.2	1.23
250	1.48	1.36	1.29	1.33	1.28	1.24	1.25	1.36	1.3	1.23	1.34	1.18	1.21	1.17	1.29	1.31	1.29	1.34	1.25	1.35	1.3	1.2	1.31	1.3	1.26	1.23	1.27	1.38	1.28	1.28	1.25	1.29	1.32	1.27	1.26	1.3	1.27	1.1	1.33	1.14	1.2	1.2	1.23	1.23	1.21	1.22	1.13	1.19	1.21
500	1.41	1.3	1.34	1.35	1.34	1.27	1.31	1.38	1.36	1.36	1.33	1.27	1.17	1.3	1.33	1.32	1.28	1.35	1.25	1.26	1.33	1.25	1.31	1.28	1.23	1.33	1.22	1.3	1.28	1.28	1.33	1.19	1.34	1.24	1.24	1.27	1.26	1.18	1.26	1.19	1.2	1.28	1.23	1.13	1.24	1.25	1.17	1.17	1.18
750	1.43	1.36	1.37	1.37	1.4	1.38	1.4	1.38	1.34	1.32	1.34	1.29	1.1	1.39	1.36	1.31	1.22	1.36	1.36	1.31	1.29	1.32	1.32	1.27	1.19	1.24	1.24	1.28	1.29	1.24	1.3	1.28	1.4	1.27	1.24	1.28	1.32	1.17	1.31	1.16	1.24	1.3	1.26	1.09	1.27	1.22	1.26	1.18	1.23
1000	1.43	1.38	1.4	1.38	1.37	1.39	1.38	1.33	1.36	1.32	1.3	1.35	1.19	1.39	1.31	1.27	1.21	1.3	1.33	1.31	1.29	1.31	1.25	1.31	1.2	1.28	1.27	1.26	1.25	1.24	1.21	1.28	1.34	1.27	1.21	1.23	1.28	1.22	1.34	1.14	1.17	1.25	1.28	1.16	1.28	1.25	1.03	1.24	1.25
1250	1.37	1.37	1.41	1.33	1.37	1.38	1.37	1.3	1.35	1.29	1.29	1.27	1.22	1.38	1.29	1.3	1.23	0.97	1.32	1.3	1.28	1.31	1.31	1.28	1.27	1.27	1.29	1.19	1.31	1.28	1.19	1.25	1.26	1.27	1.14	1.2	1.31	1.32	1.27	1.19	1.17	1.3	1.23	1.19	1.25	1.23	1.23	1.22	1.25
1500	1.32	1.39	1.38	1.31	1.31	1.4	1.35	1.31	1.37	1.34	1.31	1.29	1.26	1.37	1.31	1.34	1.22	0.95	1.3	1.26	1.31	1.32	1.29	1.32	1.33	1.25	1.29	1.2	1.28	1.29	1.2	1.25	1.28	1.24	1.19	1.19	1.28	1.3	1.26	1.22	1.17	1.3	1.24	1.23	1.2	1.15	1.2	1.19	1.21
1750	1.29	1.41	1.32	1.27	1.33	1.34	1.3	1.29	1.34	1.36	1.28	1.31	1.29	1.4	1.27	1.39	1.22	1.11	1.34	1.29	1.37	1.37	1.27	1.3	1.32	1.25	1.22	1.19	1.31	1.26	1.2	1.22	1.26	1.22	1.16	1.17	1.32	1.31	1.17	1.21	1.2	1.26	1.27	1.24	1.23	1.15	1.2	1.18	1.12
2000	1.31	1.36	1.33	1.31	1.31	1.37	1.3	1.29	1.37	1.38	1.24	1.32	1.32	1.4	1.25	1.36	1.24	1.22	1.28	1.32	1.28	1.36	1.26	1.28	1.35	1.23	1.23	1.15	1.24	1.26	1.24	1.27	1.29	1.22	1.14	1.15	1.22	1.29	1.25	1.15	1.18	1.21	1.25	1.18	1.21	1.17	1.24	1.23	1.19
2250	1.32	1.37	1.34	1.25	1.34	1.28	1.27	1.27	1.31	1.33	1.25	1.28	1.29	1.28	1.25	1.31	1.32	1.28	1.31	1.29	1.27	1.3	1.28	1.27	1.34	1.25	1.2	1.21	1.25	1.29	1.23	1.25	1.3	1.22	1.19	1.24	1.28	1.19	1.35	1.12	1.17	1.16	1.23	1.18	1.16	0.86	1.19	1.16	1.25
2500	1.33	1.4	1.35	1.32	1.27	1.14	1.31	1.27	1.32	1.31	1.21	1.28	1.3	1.23	1.32	1.23	1.28	1.18	1.34	1.31	1.28	1.25	1.31	1.27	1.36	1.23	1.23	1.22	1.17	1.18	1.25	1.27	1.29	1.26	1.22	1.28	1.37	1.22	1.35	1.14	1.11	1.16	1.23	1.25	1.15	1.2	1.2	1.22	1.25
2750	1.31	1.35	1.38	1.36	1.3	1.29	1.32	1.27	1.29	1.31	1.25	1.33	1.27	1.23	1.24	1.24	1.32	1.23	1.33	1.32	1.24	1.27	1.26	1.26	1.33	1.21	1.19	1.24	1.24	1.19	1.3	1.2	1.25	1.27	1.21	1.27	1.26	1.35	1.3	1.15	1.14	1.25	1.15	1.24	1.2	1.24	1.18	1.22	1.28
3000	1.33	1.29	1.33	1.33	1.27	1.28	1.3	1.32	1.27	1.32	1.22	1.25	1.27	1.28	1.25	1.29	1.32	1.28	1.24	1.27	1.28	1.31	1.25	1.24	1.29	1.25	1.18	1.2	1.24	1.17	1.22	1.15	1.13	1.16	1.15	1.21	1.17	1.25	1.28	1.19	1.21	1.14	1.1	1.2	1.21	1.23	1.15	1.2	1.29
3250	1.33	1.37	1.3	1.32	1.28	1.24	1.19	1.31	1.26	1.28	1.25	1.25	1.27	1.29	1.23	1.32	1.31	1.29	1.22	1.21	1.24	1.32	1.2	1.2	1.22	1.22	1.15	1.2	1.19	1.18	1.21	1.16	1.05	1.13	1.12	1.18	1.17	1.23	1.26	1.16	1.15	1.13	1.12	1.18	1.17	1.23	1.15	1.13	1.26
3500	1.33	1.31	1.3	1.29	1.29	1.21	1.2	1.28	1.26	1.26	1.18	1.29	1.24	1.32	1.24	1.33	1.31	1.22	1.23	1.23	1.17	1.28	1.06	1.23	1.15	1.2	1.1	1.22	1.19	1.19	1.2	1.11	0.94	1.15	1.14	1.19	1.3	1.22	1.2	1.18	1.11	1.17	1.14	1.15	1.17	1.21	1.19	1.17	1.22
3750	1.32	1.31	1.29	1.3	1.29	1.24	1.23	1.27	1.24	1.27	1.18	1.28	1.26	1.31	1.23	1.3	1.31	1.24	1.23	1.23	1.22	1.25	1.07	1.28	1.2	1.19	1.12	1.23	1.18	1.2	1.16	1.11	1.02	1.23	1.15	1.17	1.39	1.14	1.58	1.18	1.15	1.21	1.19	1.12	1.16	1.2	1.16	1.12	1.15
4000	1.3	1.33	1.2	1.29	1.28	1.25	1.24	1.27	1.22	1.18	1.18	1.21	1.24	1.26	1.21	1.25	1.28	1.22	1.2	1.18	1.19	1.25	1.17	1.25	1.24	1.23	1.12	1.18	1.12	1.17	1.18	1.14	1.15	1.17	1.19	1.16	1.39	1.13	0	1.21	1.16	1.1	1.18	1.1	1.13	1.17	1.17	1.1	1.11
4250	1.26	1.23	1.23	1.28	1.23	1.2	1.25	1.22	1.18	1.2	1.17	1.25	1.27	1.2	1.11	1.25	1.29	1.2	1.24	1.19	1.24	1.23	1.18	1.18	1.19	1.2	1.14	1.18	1.15	1.17	1.13	1.13	1.2	1.16	1.16	1.14	1.38	1.14	0	1.18	1.13	1.08	1.15	1.1	1.18	1.17	1.13	1.08	1.03
4500	1.32	1.22	1.16	1.27	1.1	1.22	1.25	1.21	1.16	1.16	1.18	1.18	1.17	1.16	1.14	1.35	1.33	1.21	1.2	1.17	1.21	1.16	1.15	1.13	1.18	1.17	1.13	1.17	1.12	1.16	1.1	1.17	1.21	1.15	1.18	1.16	1.37	1.17	0.91	1.08	1.12	1.09	1.13	1.08	1.15	1.14	1.17	1.03	0.98
4750	1.25	1.21	1.27	1.22	1.09	1.21	1.18	1.18	1.16	1.15	1.13	1.18	1.18	1.18	1.09	1.3	1.28	1.2	1.2	1.18	1.17	1.14	1.21	1.12	1.23	1.17	1.08	1.17	1	1.13	1.07	1.18	1.18	1.15	1.18	1.17	1.4	1.18	0.97	1.14	1.09	1.12	1.06	1.08	1.12	1.17	1.16	1.07	1.05
5000	1.2	1.22	1.25	1.21	1.17	1.17	1.18	1.23	1.15	1.15	1.19	1.2	1.21	1.22	1.16	1.22	1.3	1.15	1.2	1.19	1.16	1.11	1.16	1.15	1.21	1.17	1.08	1.12	0.76	1.17	1.07	1.06	1.13	1.14	1.21	1.19	1.4	1.1	0.99	1.1	1.09	1.07	1.05	1.08	1.09	1.12	1.14	1.11	1.07
[truncated: 350 more columns]

## Sheet: 216_WT_Fig3
	ARS922	ARS1021	ARS731.5	ARS1303	ARS1103	ARS1019	ARS131n	ARS1332	ARS305	ARS508	ARS1215	ARS306	ARS1213	ARS820	ARS315	ARS1623	ARS1510	ARS720	ARS511	ARS1217	ARS1018	ARS1220	ARS516	ARS607	ARS202	ARS1510.5	ARS413	ARS714	ARS1618	ARS813	ARS523	ARS1529.5	ARS1206	ARS1008	ARS727	ARS1206.5	ARS815	ARS1614	ARS1511	ARS909	ARS1109	ARS1218	ARS416	ARS1018.5	ARS404	ARS432.5	ARS1619	ARS425	ARS1330
-5000	1.06	1.01	0.89	0.92	0.95	0.94	1.34	1.12	1.01	0.96	0.97	1.01	0.93	1.01	0.89	0.93	0.98	0.95	0.94	0.89	0.9	0.94	0.95	0.98	0.97	0.94	1.03	0.93	0.99	0.94	0.95	1.01	0.92	0.98	1.09	0.96	0.91	0.99	0.99	0.94	0.95	1.01	0.91	0.94	0.98	1.09	0.97	0.98	0.97
-4750	1.05	1.03	0.94	0.99	1.08	0.97	1.36	1.05	1.01	0.92	0.97	1	0.97	0.98	0.89	0.9	0.96	0.97	1.02	0.95	0.94	0.97	0.96	0.95	1	0.96	0.96	0.92	1	0.94	0.98	0.97	0.96	1.05	1.12	1.02	0.88	0.97	0.96	0.93	0.89	1	0.91	0.95	1.02	1.08	0.98	0.98	0.96
-4500	1.1	0.99	0.98	0.99	1.03	0.97	1.26	1.03	0.99	0.95	0.99	0.98	1.01	0.95	0.93	0.91	0.91	0.94	1.06	0.96	0.98	0.99	0.94	0.92	1.05	1.05	0.93	0.96	0.97	1	1.02	1.02	0.96	1.03	1.08	1.08	0.91	0.97	1	0.97	0.9	1	0.88	1.01	1.06	1.11	1.05	0.97	0.94
-4250	1.08	0.93	0.97	0.96	1.1	0.98	1.29	1	0.91	0.92	0.98	1.02	0.99	0.95	0.93	1	0.97	0.95	1.03	1	1.01	0.98	1	0.99	1.03	1.04	0.93	0.94	0.98	1.03	0.97	0.98	0.92	0.97	1.06	1.19	0.96	0.92	0.99	0.98	0.99	1.06	0.86	1.05	1.01	1.1	1.01	0.97	0.94
-4000	1.09	1.02	0.99	0.94	1.06	1.02	1.29	0.99	0.96	0.97	0.97	1.08	1	0.99	0.95	0.96	1.03	0.89	0.99	1.02	0.95	0.97	1.04	0.99	0.99	1.05	0.99	0.99	0.97	0.98	0.94	1.07	1	1	1.03	1.25	0.95	0.92	1	0.97	1.07	1.08	0.89	0.94	1.02	1	0.96	0.99	1.01
-3750	1.01	1	1.01	0.99	0.98	1.02	1.26	1.03	1.03	1.03	0.97	1.03	1.15	1.02	0.96	0.99	0.97	0.96	0.96	1.05	0.92	1.03	1.01	1.02	1.09	1.01	0.97	1.06	0.99	1.03	0.93	1.04	1.02	1.03	0.98	1.29	0.97	0.96	1	0.95	0.98	1.04	0.87	0.94	1	1.01	0.99	1.03	0.98
-3500	1.06	1.04	1.01	1.09	0.98	1.02	1.25	1.02	0.99	1.03	1	0.99	1.03	1.02	0.96	0.95	0.96	0.98	0.97	0.99	0.93	1.03	1.04	0.98	1.04	1.07	0.94	1.06	0.95	1	0.95	1.01	1.01	1.07	0.95	1.28	1.04	0.98	1.04	1.02	1.02	1.05	0.98	0.94	0.97	1.02	1.03	0.97	0.99
-3250	1.13	1.1	1.05	1.14	1.01	1.07	1.16	1.05	1.1	1	1.06	1.05	1.01	1.01	1	0.97	1.01	0.98	0.93	1.06	0.98	1.07	1.05	1.02	1.03	1.03	0.94	1.11	0.98	0.98	1.01	1.07	0.96	1.05	1.03	1.29	1.09	1.03	1.08	1.03	1.03	1.09	1.03	0.99	0.97	1.04	1.03	0.96	1.02
-3000	1.13	1.1	1.07	1.17	1.04	1.05	1.16	1.06	1.18	1.03	1.09	1.08	1.1	1.11	1.07	1.04	1.05	1.03	1.02	1.04	1.01	0.93	1.08	1.01	1.1	1.05	0.95	1.08	1.02	0.98	1.06	1.1	1.02	1.08	1	1.36	0.98	1.03	1.04	1.1	1.03	1.09	1.04	0.97	0.99	1.06	1	0.99	1.05
-2750	1.13	1.1	1.13	1.19	1.09	1.1	1.14	1.13	1.2	1.17	1.12	1.16	1.15	1.13	1.09	1.07	1.11	1.09	1.07	1.14	1.05	0.95	1.11	1.04	1.13	1.07	1.03	1.13	1.02	1.08	1.08	1.08	1.08	1.1	1	1.38	1.04	1.04	1.06	1.07	1.04	1.12	1.08	0.98	1.01	1.07	1.05	1.07	1.07
-2500	1.16	1.12	1.18	1.22	1.14	1.16	1.13	1.17	1.16	1.21	1.15	1.22	1.2	1.09	1.1	1.1	1.16	1.16	1.14	1.18	1.19	1.04	1.14	1.12	1.17	1.12	1.03	1.15	1.07	1.11	1.11	1.07	1.19	1.19	1.05	1.35	1.14	1.06	1.08	1.06	1.09	1.18	1.16	1.01	0.98	1.17	1.08	1.05	1.08
-2250	1.2	1.18	1.24	1.22	1.27	1.19	1.09	1.21	1.23	1.2	1.17	1.25	1.22	1.12	1.15	1.15	1.18	1.24	1.21	1.27	1.24	1.09	1.15	1.24	1.17	1.18	1.05	1.17	1.15	1.14	1.13	1.09	1.25	1.16	1.08	1.39	1.19	1.12	1.13	1.14	1.08	1.22	1.24	0.96	1.03	1.19	1.14	1.02	1.13
-2000	1.26	1.22	1.31	1.32	1.23	1.21	1.08	1.29	1.25	1.2	1.29	1.23	1.29	1.16	1.25	1.17	1.22	1.32	1.28	1.29	1.17	1.18	1.16	1.25	1.26	1.16	1.2	1.21	1.25	1.24	1.08	1.11	1.29	1.05	1.13	1.39	1.26	1.21	1.26	1.21	1.09	1.3	1.26	0.96	1.15	1.19	1.23	1.08	1.22
-1750	1.29	1.24	1.35	1.42	1.33	1.26	1.1	1.39	1.24	1.29	1.32	1.29	1.32	1.28	1.23	1.29	1.27	1.31	1.28	1.32	1.21	1.29	1.22	1.31	1.38	1.2	1.21	1.29	1.23	1.29	1.19	1.17	1.28	1.13	1.21	1.41	1.23	1.3	1.24	1.21	1.18	1.29	1.36	0.94	1.19	1.23	1.25	1.09	1.28
-1500	1.33	1.33	1.34	1.45	1.35	1.36	1.13	1.39	1.29	1.43	1.39	1.33	1.3	1.31	1.27	1.32	1.28	1.32	1.36	1.34	1.3	1.35	1.27	1.39	1.36	1.24	1.32	1.28	1.25	1.29	1.23	1.23	1.29	1.32	1.25	1.45	1.29	1.38	1.23	1.2	1.29	1.33	1.4	0.94	1.19	1.24	1.29	1.08	1.26
-1250	1.4	1.4	1.4	1.47	1.39	1.41	1.16	1.39	1.26	1.46	1.41	1.27	1.33	1.26	1.36	1.34	1.32	1.3	1.39	1.37	1.29	1.39	1.3	1.33	1.36	1.22	1.31	1.27	1.29	1.34	1.36	1.23	1.36	1.19	1.32	1.46	1.33	1.43	1.31	1.22	1.32	1.33	1.41	0.97	1.21	1.22	1.27	1.09	1.28
-1000	1.42	1.49	1.46	1.47	1.45	1.41	1.17	1.43	1.37	1.44	1.42	1.35	1.39	1.32	1.42	1.37	1.38	1.36	1.4	1.43	1.29	1.31	1.34	1.37	1.45	1.22	1.36	1.4	1.29	1.33	1.37	1.26	1.38	1.13	1.36	1.28	1.37	1.42	1.33	1.34	1.34	1.34	1.41	0.97	1.24	1.2	1.34	1.08	1.3
-750	1.46	1.45	1.45	1.5	1.45	1.42	1.22	1.46	1.4	1.4	1.43	1.38	1.33	1.38	1.34	1.4	1.38	1.38	1.39	1.47	1.36	1.39	1.35	1.41	1.46	1.43	1.37	1.4	1.43	1.37	1.42	1.33	1.35	1.2	1.35	1.35	1.44	1.41	1.41	1.37	1.39	1.31	1.43	0.98	1.32	1.25	1.38	1.13	1.29
-500	1.41	1.52	1.45	1.47	1.42	1.34	1.22	1.46	1.42	1.39	1.39	1.38	1.33	1.4	1.36	1.44	1.36	1.38	1.42	1.42	1.36	1.44	1.32	1.34	1.34	1.77	1.41	1.37	1.38	1.36	1.43	1.3	1.39	1.27	1.3	1.29	1.44	1.44	1.4	1.44	1.31	1.29	1.44	1.02	1.37	1.34	1.36	1.2	1.26
-250	1.49	1.47	1.44	1.49	1.45	1.36	1.26	1.4	1.35	1.41	1.44	1.38	1.38	1.39	1.49	1.39	1.43	1.37	1.4	1.39	1.36	1.42	1.33	1.38	1.31	1.79	1.43	1.35	1.38	1.5	1.43	1.37	1.39	1.36	1.31	1.28	1.44	1.5	1.38	1.42	1.36	1.35	1.41	1.02	1.44	1.31	1.32	1.34	1.29
Midpoint	1.57	1.53	1.42	1.44	1.48	1.38	1.27	1.44	1.4	1.42	1.53	1.35	1.4	1.37	1.39	1.48	1.42	1.33	1.39	1.37	1.47	1.39	1.4	1.46	1.33	1.69	1.49	1.43	1.39	1.63	1.44	1.45	1.41	1.42	1.43	1.24	1.35	1.45	1.42	1.4	1.31	1.34	1.39	1.02	1.45	1.29	1.4	1.33	1.38
250	1.49	1.54	1.41	1.35	1.48	1.31	1.23	1.42	1.44	1.4	1.5	1.36	1.39	1.41	1.3	1.41	1.3	1.46	1.39	1.37	1.41	1.4	1.36	1.42	1.35	1.5	1.36	1.49	1.42	1.52	1.32	1.34	1.45	1.41	1.41	1.27	1.3	1.38	1.36	1.47	1.3	1.36	1.4	1.07	1.39	1.29	1.43	1.38	1.42
500	1.47	1.52	1.43	1.39	1.47	1.39	1.18	1.43	1.43	1.41	1.41	1.41	1.42	1.34	1.34	1.35	1.34	1.39	1.36	1.4	1.44	1.42	1.3	1.37	1.31	1.33	1.36	1.42	1.42	1.45	1.33	1.3	1.46	1.38	1.42	1.2	1.29	1.39	1.37	1.38	1.34	1.37	1.33	1.05	1.42	1.34	1.38	1.4	1.26
750	1.47	1.53	1.42	1.4	1.42	1.4	1.14	1.41	1.42	1.39	1.44	1.43	1.3	1.35	1.42	1.43	1.37	1.36	1.38	1.37	1.48	1.42	1.3	1.38	1.3	1.26	1.41	1.48	1.42	1.41	1.3	1.34	1.28	1.31	1.35	1.11	1.31	1.37	1.35	1.37	1.32	1.27	1.33	1.1	1.39	1.32	1.38	1.35	1.26
1000	1.48	1.47	1.41	1.37	1.39	1.46	1.14	1.35	1.45	1.44	1.38	1.38	1.27	1.33	1.45	1.4	1.36	1.34	1.37	1.39	1.41	1.41	1.36	1.53	1.25	1.27	1.38	1.43	1.4	1.32	1.23	1.34	1.35	1.36	1.3	1.1	1.29	1.35	1.3	1.41	1.35	1.28	1.34	1.16	1.35	1.35	1.37	1.37	1.28
1250	1.46	1.5	1.38	1.34	1.38	1.43	1.05	1.29	1.49	1.37	1.34	1.25	1.31	1.39	1.47	1.39	1.36	1.35	1.32	1.34	1.26	1.34	1.38	1.59	1.28	1.23	1.39	1.26	1.36	1.36	1.22	1.34	1.29	1.29	1.32	1.01	1.29	1.35	1.32	1.31	1.38	1.25	1.32	1.19	1.33	1.28	1.3	1.42	1.25
1500	1.39	1.46	1.38	1.31	1.32	1.48	1.12	1.21	1.36	1.37	1.27	1.3	1.26	1.4	1.36	1.33	1.31	1.33	1.29	1.27	1.34	1.33	1.39	1.4	1.26	1.19	1.37	1.26	1.35	1.32	1.16	1.29	1.28	1.27	1.36	0.98	1.28	1.25	1.3	1.26	1.38	1.25	1.36	1.21	1.29	1.22	1.22	1.37	1.28
1750	1.37	1.4	1.33	1.32	1.27	1.43	1.13	1.21	1.35	1.31	1.21	1.31	1.22	1.39	1.34	1.32	1.28	1.35	1.29	1.17	1.31	1.28	1.32	1.22	1.17	1.13	1.34	1.14	1.25	1.24	1.12	1.27	1.24	1.29	1.38	0.93	1.22	1.19	1.26	1.22	1.25	1.19	1.32	1.26	1.22	1.29	1.17	1.28	1.24
2000	1.37	1.32	1.31	1.26	1.28	1.35	1.19	1.19	1.23	1.28	1.24	1.25	1.2	1.33	1.27	1.32	1.28	1.27	1.2	1.14	1.33	1.23	1.36	1.17	1.08	1.14	1.33	1.12	1.27	1.15	1.12	1.24	1.27	1.28	1.25	0.94	1.23	1.09	1.24	1.15	1.32	1.13	1.31	1.36	1.18	1.22	1.17	1.32	1.15
2250	1.33	1.33	1.31	1.2	1.25	1.2	1.41	1.17	1.22	1.25	1.2	1.21	1.17	1.2	1.24	1.31	1.26	1.2	1.14	1.08	1.25	1.2	1.26	1.15	1.08	1.06	1.23	1.08	1.22	1.11	1.1	1.15	1.2	1.27	1.2	0.93	1.2	1.1	1.19	1.15	1.24	1.08	1.19	1.41	1.14	1.14	1.1	1.3	1.13
2500	1.31	1.3	1.25	1.13	1.14	1.15	1.47	1.11	1.2	1.19	1.16	1.17	1.17	1.12	1.2	1.21	1.21	1.22	1.12	1.09	1.21	1.18	1.21	1.03	1.11	1.06	1.23	1.1	1.16	1.11	1.12	1.07	1.11	1.17	1.12	0.94	1.22	1.12	1.09	1.12	1.15	1.05	1.11	1.41	1.1	1.06	1.11	1.29	1.13
2750	1.3	1.24	1.24	1.09	1.06	1.14	1.3	1.05	1.1	1.14	1.1	1.14	1.13	1.09	1.19	1.13	1.12	1.19	1.09	1.11	1.15	1.12	1.17	1.03	1.09	1.06	1.15	1.1	1.05	1.02	1.06	1.07	1.1	1.13	1.05	0.96	1.15	1.1	1.07	1.07	1.18	1.07	1.06	1.42	1.1	1.05	1.08	1.25	1.12
3000	1.15	1.17	1.17	1.1	1.05	1.08	1.21	1.03	1.03	1.07	1.02	1.09	1.06	1.05	1.1	1.08	1.06	1.1	1.09	1.03	1.13	1.05	1.1	1.05	1.08	1	1.06	1.03	1.03	0.98	1.03	1.04	1.01	1.15	1.03	0.96	1.08	1.08	1.01	1.03	1.16	1.05	1.02	1.34	1.09	1.01	1.02	1.21	1.09
3250	1.14	1.1	1.09	1.05	1.04	1.01	1.14	1.05	1.05	1.06	1.03	1.04	1.07	1.06	1.06	1.05	1.06	1.03	1.02	1.03	1.15	1.02	1.01	1	1.01	0.98	1.01	1	1.05	0.95	1.1	1.05	0.98	1.11	1	0.99	1.04	0.98	0.97	1.07	1.08	1.05	0.99	1.36	1.06	1.03	1	1.11	1.11
3500	1.12	1.14	1.1	0.99	1.04	0.98	1.14	1.08	0.98	1.04	0.98	1	1.04	1.05	1.09	1	1.05	1.01	0.96	1	1.05	1.02	0.99	0.93	0.99	0.95	1.02	0.98	1	0.99	1.09	1.1	0.93	1.01	0.98	0.97	1.02	0.97	0.98	1.01	1.01	1.01	0.96	1.38	1.05	1	1.07	1.07	1.07
3750	1.11	1.08	1.08	0.95	0.98	0.99	1.07	1.05	0.97	0.99	1.01	1.01	1.04	1	0.99	1.01	1.07	0.99	0.96	0.96	0.97	1.05	0.94	0.93	1.06	0.96	0.97	0.97	0.98	0.94	1.07	1.07	0.94	0.98	0.97	0.96	0.98	0.96	0.98	0.98	1	0.94	0.92	1.31	1	0.95	1.04	1.06	1.03
4000	1.08	1.08	0.95	0.94	1	1.02	1.04	1	0.94	0.91	0.97	0.96	1.02	0.99	0.98	0.94	0.99	0.97	0.98	0.97	0.94	0.98	0.97	0.89	1.02	0.99	0.92	0.95	0.98	0.92	1.05	1.04	0.93	0.98	0.95	0.93	0.98	0.94	0.97	0.99	0.94	0.92	0.95	1.39	0.99	0.97	0.95	1.05	1.03
4250	1.07	1.06	0.93	1.04	0.96	0.99	1.04	0.98	0.93	0.9	0.94	0.94	1.02	1	1.01	0.96	0.99	0.95	1	0.99	0.92	0.96	0.99	0.93	0.99	0.99	0.95	1	0.92	0.96	1.14	1.06	0.94	1	0.92	0.94	0.98	0.9	0.98	0.96	0.95	0.91	0.91	1.4	0.99	0.98	0.94	1.04	1.02
4500	1.05	0.97	0.98	1.02	0.96	1.01	1.04	0.97	0.91	0.86	0.93	0.92	0.96	1.02	1	0.94	0.97	0.95	0.97	0.96	0.9	0.95	0.93	0.95	0.95	0.95	0.95	0.95	0.96	0.96	1.15	1.02	0.96	0.97	0.95	0.94	0.96	0.94	0.93	0.94	0.92	0.92	0.86	1.46	0.94	0.98	0.94	0.99	1.01
4750	0.95	0.99	0.98	0.95	0.94	0.99	1.02	0.95	0.95	0.92	0.95	0.93	0.98	1.03	0.94	0.95	0.98	0.98	0.97	0.95	0.97	0.96	0.93	0.94	0.93	0.95	0.97	0.96	0.97	0.97	1.19	1	0.96	0.96	0.93	0.96	0.98	0.97	0.96	0.99	0.95	0.92	0.87	1.43	1.01	0.99	0.94	0.99	1.02
5000	0.91	1	0.99	0.92	0.95	1	1	0.92	0.99	0.95	0.93	0.91	0.92	0.96	0.97	0.96	0.95	0.93	1	0.92	0.95	0.94	0.95	0.93	0.92	0.93	0.96	0.98	0.99	0.93	1.17	1.03	0.99	0.94	0.97	0.96	0.94	0.95	0.92	1	0.96	0.94	0.85	1.48	1.05	1	0.9	0.97	1.01
[truncated: 350 more columns]

## Sheet: 338_rif1-1322_Fig4
	ARS1529.5	ARS306	ARS1021	ARS922	ARS305	ARS1330	ARS607	ARS428	ARS731.5	ARS508	ARS1114	ARS1511	ARS1014	ARS131n	ARS208	ARS201	ARS824	ARS1310	ARS1218	ARS510	ARS110	ARS108	ARS1213	ARS1211	ARS523	ARS1113.5	ARS1309	ARS503	ARS131a	ARS1002	ARS307	ARS1019	ARS315	ARS418	ARS1601	ARS209	ARS432.5	ARS606	ARS1018	ARS432	ARS1216.5	ARS1422	ARS802	ARS600.1	ARS913	ARS720	ARS815	ARS1018.5	ARS731
-5000	1.19	1.24	1.22	1.23	1.18	1.17	1.24	1.13	1.11	1.2	1.14	1.17	1.17	1.48	1.06	1.57	0.95	1.12	0.89	1.11	1.06	1.06	1.11	1.1	1.01	0.89	1.09	1.6	0.97	1.59	1.1	1.07	1.09	1.09	1.47	1.07	1.17	1.06	1.07	1.06	1.17	1.18	1.46	1.53	1.08	1.05	1.03	0.94	1.02
-4750	1.2	1.26	1.24	1.24	1.22	1.2	1.18	1.18	1.11	1.19	1.12	1.23	1.18	1.49	1.1	1.58	0.94	1.14	0.95	1.13	1.13	1.11	1.15	1.07	1	0.9	1.07	1.55	0.98	1.54	1.13	1.1	1.09	1.07	1.48	1.1	1.16	1.05	1.07	1.15	1.17	1.22	1.45	1.56	1.12	1.04	1.06	0.9	1.03
-4500	1.22	1.26	1.23	1.2	1.25	1.18	1.23	1.19	1.07	1.2	1.13	1.19	1.15	1.54	1.13	1.58	0.94	1.12	0.93	1.13	1.16	1.16	1.14	1.05	1.07	0.91	1.07	1.52	0.99	1.51	1.12	1.1	1.12	1.12	1.44	1.08	1.2	1.07	1.08	1.1	1.16	1.23	1.44	1.6	1.1	1.05	1.08	0.91	1.02
-4250	1.24	1.27	1.2	1.28	1.28	1.24	1.24	1.19	1.07	1.22	1.19	1.27	1.19	1.55	1.22	1.54	1	1.1	0.94	1.16	1.16	1.15	1.15	1.07	1.01	0.96	1.1	1.53	0.99	1.5	1.12	1.1	1.11	1.16	1.46	1.16	1.27	1.1	1.08	1.13	1.17	1.23	1.43	1.48	1.07	1.08	1.05	0.93	1.06
-4000	1.28	1.33	1.22	1.26	1.31	1.26	1.22	1.21	1.1	1.25	1.22	1.24	1.21	1.57	1.26	1.47	0.98	1.11	1.11	1.2	1.22	1.13	1.17	1.09	1.03	0.99	1.13	1.53	1	1.51	1.16	1.16	1.17	1.18	1.41	1.19	1.24	1.17	1.13	1.17	1.18	1.2	1.44	1.45	1.1	1.08	1.05	0.95	1.08
-3750	1.31	1.33	1.29	1.23	1.34	1.27	1.29	1.17	1.23	1.28	1.23	1.26	1.2	1.56	1.22	1.45	0.99	1.21	1.19	1.21	1.17	1.1	1.15	1.11	1.09	0.93	1.15	1.47	0.99	1.5	1.17	1.13	1.21	1.15	1.36	1.25	1.21	1.17	1.15	1.14	1.18	1.25	1.4	1.51	1.13	1.09	1.13	1.01	1.12
-3500	1.36	1.37	1.33	1.24	1.32	1.32	1.31	1.2	1.23	1.28	1.22	1.3	1.26	1.51	1.27	1.48	0.98	1.18	1.18	1.2	1.17	1.11	1.16	1.16	1.03	0.97	1.17	1.42	1.02	1.51	1.18	1.18	1.19	1.16	1.41	1.24	1.23	1.14	1.13	1.09	1.17	1.23	1.4	1.49	1.08	1.08	1.11	0.97	1.12
-3250	1.42	1.31	1.37	1.33	1.35	1.3	1.32	1.24	1.28	1.22	1.28	1.29	1.28	1.49	1.27	1.47	1	1.21	1.2	1.2	1.19	1.19	1.19	1.22	1.03	1	1.14	1.48	0.98	1.44	1.21	1.17	1.17	1.15	1.46	1.22	1.24	1.12	1.13	1.07	1.17	1.26	1.36	1.47	1.12	1.09	1.11	0.95	1.11
-3000	1.4	1.3	1.41	1.37	1.32	1.3	1.36	1.25	1.28	1.28	1.27	1.3	1.2	1.46	1.25	1.45	1.07	1.25	1.21	1.18	1.21	1.25	1.24	1.18	1.03	1.03	1.22	1.51	1.08	1.43	1.21	1.15	1.15	1.18	1.51	1.23	1.28	1.15	1.19	1.1	1.17	1.27	1.37	1.43	1.17	1.1	1.14	0.98	1.11
-2750	1.39	1.31	1.35	1.39	1.41	1.29	1.31	1.31	1.31	1.33	1.3	1.27	1.25	1.45	1.23	1.46	1.05	1.2	1.26	1.17	1.25	1.24	1.23	1.23	1.02	1.07	1.24	1.43	0.95	1.46	1.21	1.2	1.16	1.23	1.42	1.25	1.28	1.23	1.19	1.14	1.16	1.33	1.39	1.45	1.13	1.1	1.11	0.99	1.1
-2500	1.39	1.37	1.37	1.46	1.42	1.34	1.38	1.3	1.32	1.35	1.29	1.33	1.25	1.44	1.25	1.42	1.02	1.14	1.33	1.28	1.31	1.19	1.24	1.25	1	1.12	1.27	1.4	1	1.36	1.27	1.22	1.21	1.17	1.34	1.27	1.28	1.21	1.17	1.12	1.15	1.29	1.36	1.42	1.16	1.1	1.11	1.02	1.1
-2250	1.41	1.4	1.44	1.4	1.4	1.37	1.39	1.32	1.3	1.33	1.32	1.36	1.3	1.43	1.3	1.44	1.04	1.25	1.34	1.24	1.33	1.2	1.28	1.23	1.07	1.13	1.21	1.39	1.04	1.34	1.2	1.22	1.2	1.18	1.35	1.3	1.24	1.22	1.1	1.07	1.14	1.31	1.26	1.38	1.15	1.18	1.13	1.01	1.1
-2000	1.39	1.43	1.39	1.46	1.36	1.4	1.47	1.37	1.31	1.4	1.3	1.33	1.32	1.44	1.36	1.32	1.05	1.25	1.32	1.28	1.29	1.23	1.32	1.25	1.11	1.14	1.26	1.38	1.02	1.36	1.27	1.18	1.22	1.21	1.35	1.31	1.29	1.17	1.1	1.15	1.14	1.31	1.19	1.35	1.19	1.18	1.15	1.05	1.15
-1750	1.46	1.41	1.43	1.41	1.36	1.41	1.47	1.37	1.39	1.39	1.35	1.35	1.32	1.4	1.42	1.4	1.11	1.29	1.26	1.27	1.29	1.29	1.3	1.28	1.12	1.12	1.26	1.37	1.06	1.32	1.26	1.27	1.24	1.23	1.36	1.33	1.25	1.2	1.25	1.15	1.15	1.27	1.19	1.41	1.23	1.2	1.13	1.06	1.14
-1500	1.51	1.41	1.4	1.41	1.39	1.39	1.47	1.39	1.35	1.43	1.32	1.29	1.38	1.4	1.35	1.38	1.11	1.3	1.32	1.26	1.35	1.3	1.33	1.28	1.15	1.13	1.32	1.32	1.03	1.29	1.29	1.25	1.2	1.2	1.38	1.31	1.24	1.21	1.24	1.14	1.17	1.31	1.18	1.41	1.19	1.22	1.19	1.07	1.2
-1250	1.47	1.5	1.4	1.34	1.49	1.39	1.42	1.39	1.36	1.42	1.32	1.35	1.33	1.36	1.33	1.36	1.15	1.27	1.33	1.33	1.35	1.31	1.33	1.28	1.14	1.19	1.31	1.31	1.01	1.26	1.26	1.26	1.25	1.27	1.3	1.35	1.23	1.23	1.2	1.2	1.18	1.38	1.24	1.33	1.2	1.25	1.2	1.1	1.14
-1000	1.48	1.47	1.46	1.41	1.48	1.38	1.45	1.42	1.41	1.41	1.27	1.3	1.31	1.37	1.29	1.34	1.17	1.29	1.34	1.35	1.3	1.31	1.32	1.31	1.17	1.22	1.35	1.29	1.03	1.27	1.32	1.26	1.24	1.26	1.23	1.35	1.22	1.22	1.24	1.14	1.18	1.35	1.17	1.15	1.17	1.22	1.18	1.1	1.21
-750	1.5	1.49	1.44	1.47	1.5	1.39	1.49	1.37	1.42	1.4	1.38	1.41	1.31	1.39	1.31	1.33	1.15	1.27	1.38	1.31	1.3	1.29	1.29	1.3	1.14	1.23	1.37	1.27	1.05	1.25	1.29	1.26	1.27	1.25	1.16	1.33	1.18	1.27	1.22	1.18	1.19	1.4	1.07	0.95	1.15	1.21	1.19	1.1	1.16
-500	1.49	1.46	1.41	1.46	1.41	1.42	1.55	1.36	1.4	1.33	1.37	1.45	1.31	1.36	1.36	1.26	1.17	1.33	1.38	1.31	1.26	1.31	1.26	1.3	1.15	1.22	1.29	1.14	1.11	1.11	1.28	1.25	1.28	1.29	1.16	1.28	1.21	1.24	1.29	1.22	1.19	1.37	1.08	0.96	1.19	1.21	1.2	1.16	1.15
-250	1.44	1.45	1.42	1.44	1.38	1.44	1.43	1.4	1.36	1.34	1.33	1.43	1.3	1.26	1.34	1.26	1.16	1.29	1.35	1.27	1.24	1.3	1.28	1.3	1.16	1.28	1.37	1.11	1.15	1.17	1.31	1.3	1.25	1.26	1.18	1.35	1.19	1.3	1.32	1.24	1.19	1.41	1.17	0.94	1.15	1.24	1.28	1.13	1.16
Midpoint	1.46	1.49	1.39	1.44	1.45	1.43	1.39	1.36	1.36	1.39	1.35	1.35	1.33	1.19	1.35	1.25	1.18	1.27	1.34	1.3	1.23	1.31	1.28	1.33	1.12	1.27	1.3	1.19	1.13	1.15	1.31	1.25	1.25	1.27	1.16	1.33	1.22	1.33	1.31	1.22	1.2	1.34	1.12	0.96	1.2	1.24	1.18	1.18	1.19
250	1.46	1.51	1.43	1.42	1.45	1.43	1.33	1.38	1.36	1.38	1.35	1.32	1.3	1.19	1.32	1.15	1.22	1.3	1.39	1.33	1.29	1.31	1.25	1.28	1.12	1.3	1.31	1.17	1.18	1.17	1.32	1.23	1.22	1.26	1.11	1.33	1.26	1.3	1.31	1.24	1.2	1.33	1.13	0.99	1.23	1.19	1.17	1.17	1.24
500	1.47	1.43	1.44	1.5	1.44	1.39	1.35	1.48	1.41	1.41	1.36	1.37	1.33	1.18	1.33	1.16	1.22	1.34	1.36	1.29	1.3	1.35	1.21	1.29	1.15	1.29	1.3	1.18	1.18	1.12	1.31	1.24	1.25	1.32	1.08	1.3	1.21	1.29	1.24	1.16	1.2	1.24	1.08	0.95	1.24	1.19	1.18	1.15	1.32
750	1.43	1.47	1.45	1.46	1.47	1.39	1.38	1.46	1.44	1.38	1.41	1.34	1.37	1.24	1.34	1.14	1.28	1.42	1.38	1.28	1.31	1.34	1.19	1.35	1.22	1.32	1.31	1.11	1.27	1.09	1.31	1.29	1.31	1.23	1.07	1.37	1.19	1.27	1.17	1.15	1.2	1.2	1.08	0.97	1.18	1.21	1.15	1.2	1.21
1000	1.43	1.45	1.49	1.43	1.44	1.37	1.37	1.4	1.44	1.38	1.4	1.3	1.33	1.17	1.31	1.13	1.36	1.38	1.35	1.31	1.32	1.35	1.26	1.31	1.24	1.3	1.3	1.06	1.34	1.05	1.29	1.27	1.29	1.23	1.07	1.37	1.21	1.3	1.17	1.13	1.19	1.11	1.07	0.97	1.18	1.21	1.19	1.22	1.21
1250	1.46	1.51	1.51	1.39	1.48	1.36	1.27	1.38	1.37	1.36	1.41	1.36	1.4	1.07	1.33	1.18	1.35	1.33	1.28	1.32	1.28	1.33	1.23	1.37	1.26	1.35	1.29	1.01	1.36	1.06	1.27	1.25	1.25	1.22	1.06	1.35	1.18	1.29	1.21	1.14	1.19	0.97	1.07	0.95	1.19	1.21	1.16	1.22	1.21
1500	1.45	1.47	1.49	1.45	1.48	1.38	1.36	1.35	1.36	1.39	1.43	1.4	1.38	1.08	1.31	1.15	1.39	1.32	1.35	1.31	1.32	1.32	1.24	1.31	1.3	1.32	1.27	1.01	1.38	1.08	1.25	1.26	1.21	1.24	1.03	1.36	1.21	1.24	1.26	1.18	1.18	0.94	1.04	0.92	1.2	1.15	1.16	1.18	1.2
1750	1.44	1.45	1.44	1.41	1.44	1.33	1.35	1.4	1.38	1.38	1.38	1.4	1.28	1.17	1.25	1.14	1.42	1.3	1.29	1.3	1.28	1.29	1.29	1.32	1.36	1.32	1.23	1.07	1.38	1.06	1.23	1.19	1.22	1.23	1.03	1.37	1.16	1.22	1.22	1.17	1.18	0.97	1.03	1	1.16	1.17	1.16	1.27	1.12
2000	1.42	1.42	1.43	1.41	1.41	1.35	1.32	1.39	1.42	1.37	1.36	1.36	1.33	1.12	1.24	1.1	1.4	1.33	1.31	1.31	1.25	1.24	1.26	1.29	1.37	1.27	1.24	1.01	1.39	1.07	1.2	1.18	1.21	1.21	1.01	1.34	1.13	1.25	1.25	1.16	1.17	1	1.06	0.98	1.17	1.17	1.15	1.25	1.15
2250	1.4	1.38	1.46	1.39	1.36	1.39	1.28	1.36	1.36	1.34	1.36	1.32	1.32	1.13	1.28	1.04	1.42	1.3	1.28	1.32	1.28	1.31	1.27	1.27	1.4	1.38	1.17	0.99	1.41	1.06	1.2	1.19	1.24	1.24	1.02	1.31	1.15	1.22	1.28	1.2	1.18	1.04	1.03	0.96	1.17	1.16	1.14	1.26	1.16
2500	1.38	1.36	1.46	1.42	1.34	1.38	1.28	1.37	1.35	1.3	1.34	1.29	1.26	1.08	1.24	1.03	1.48	1.27	1.24	1.32	1.28	1.27	1.24	1.23	1.39	1.37	1.14	0.99	1.41	1.02	1.16	1.21	1.19	1.24	1.06	1.29	1.14	1.17	1.25	1.27	1.18	0.96	1.01	0.96	1.16	1.14	1.13	1.26	1.18
2750	1.35	1.35	1.41	1.35	1.34	1.35	1.29	1.35	1.4	1.27	1.36	1.3	1.28	1.08	1.27	1.02	1.54	1.24	1.24	1.24	1.28	1.25	1.21	1.2	1.39	1.33	1.15	0.99	1.45	1.03	1.14	1.27	1.18	1.22	1.06	1.23	1.18	1.15	1.18	1.24	1.18	0.96	1	0.98	1.08	1.17	1.16	1.26	1.13
3000	1.31	1.36	1.39	1.32	1.34	1.39	1.26	1.35	1.36	1.26	1.36	1.29	1.29	1.07	1.29	1.02	1.5	1.21	1.25	1.19	1.24	1.29	1.23	1.19	1.37	1.35	1.21	0.99	1.41	1	1.13	1.23	1.18	1.19	1.02	1.27	1.14	1.15	1.17	1.21	1.17	1	1.03	0.99	1.09	1.19	1.1	1.25	1.09
3250	1.31	1.36	1.33	1.34	1.34	1.34	1.32	1.32	1.32	1.25	1.31	1.3	1.28	1.07	1.25	1.03	1.46	1.25	1.28	1.18	1.17	1.26	1.25	1.19	1.43	1.35	1.23	0.98	1.41	0.95	1.12	1.2	1.21	1.24	1.02	1.27	1.13	1.15	1.16	1.23	1.17	1	0.99	0.95	1.06	1.12	1.12	1.3	1.07
3500	1.35	1.38	1.33	1.36	1.3	1.33	1.33	1.34	1.3	1.23	1.33	1.22	1.24	1.04	1.2	1	1.52	1.25	1.23	1.21	1.12	1.22	1.25	1.17	1.46	1.36	1.17	0.96	1.41	0.94	1.11	1.17	1.18	1.14	0.99	1.18	1.13	1.15	1.18	1.24	1.17	1.02	1.01	0.93	1.16	1.1	1.13	1.25	1.1
3750	1.36	1.31	1.28	1.3	1.27	1.26	1.26	1.27	1.29	1.2	1.3	1.26	1.22	1.03	1.17	1	1.52	1.2	1.18	1.21	1.14	1.19	1.21	1.17	1.44	1.41	1.18	0.99	1.46	0.94	1.09	1.18	1.16	1.12	0.96	1.31	1.1	1.16	1.17	1.28	1.17	0.98	0.94	0.91	1.14	1.1	1.11	1.23	1.07
4000	1.29	1.26	1.3	1.31	1.28	1.22	1.25	1.26	1.27	1.17	1.21	1.15	1.25	1.06	1.13	0.96	1.53	1.22	1.18	1.19	1.18	1.19	1.2	1.15	1.42	1.4	1.19	0.98	1.45	0.95	1.1	1.19	1.17	1.12	0.98	0	1.09	1.15	1.17	1.28	1.17	0.97	0.95	0.94	1.07	1.09	1.09	1.24	1.03
4250	1.24	1.19	1.31	1.29	1.21	1.19	1.21	1.24	1.21	1.14	1.19	1.17	1.19	1.03	1.12	1.01	1.54	1.15	1.18	1.19	1.2	1.11	1.21	1.15	1.45	1.41	1.15	0.92	1.46	0.96	1.1	1.17	1.16	1.11	1.02	0	1.1	1.11	1.15	1.28	1.17	0.95	0.98	0.97	1.13	1.06	1.05	1.29	1.06
4500	1.18	1.19	1.27	1.3	1.18	1.22	1.16	1.19	1.23	1.17	1.19	1.16	1.16	1.01	1.07	0.99	1.55	1.17	1.17	1.1	1.13	1.07	1.19	1.16	1.46	1.43	1.1	0.95	1.5	0.94	1.13	1.15	1.13	1.09	1.03	1	1.1	1.1	1.19	1.24	1.17	0.95	0.98	0.97	1.12	1.09	1.07	1.27	1.07
4750	1.18	1.16	1.23	1.28	1.17	1.22	1.15	1.18	1.22	1.2	1.21	1.16	1.21	1	1.1	0.99	1.47	1.14	1.16	1.06	1.12	1.14	1.17	1.17	1.46	1.38	1.04	0.93	1.49	0.96	1.09	1.12	1.13	1.11	0.96	0.98	1.1	1.11	1.15	1.29	1.17	0.94	1.01	0.94	1.11	1.07	1.1	1.25	1.02
5000	1.23	1.2	1.21	1.23	1.21	1.19	1.16	1.18	1.22	1.14	1.18	1.12	1.11	1.03	1.11	1.01	1.5	1.13	1.14	1.08	1.11	1.14	1.11	1.13	1.49	1.36	1	0.92	1.5	0.97	1.01	1.1	1.06	1.11	0.93	0.96	1.1	1.09	1.11	1.25	1.18	0.97	0.97	0.95	1.05	1.09	1.07	1.26	1.01
[truncated: 350 more columns]

[truncated: 1 more sheets: 358_rirf1-HOOK_Fig4]
