# Supplementary figures and images for: The role of Rif1 in telomere length regulation is separable from its role in origin firing
Source: eLife journal article supplement (doi:10.7554/elife.58066), 2020-06-29

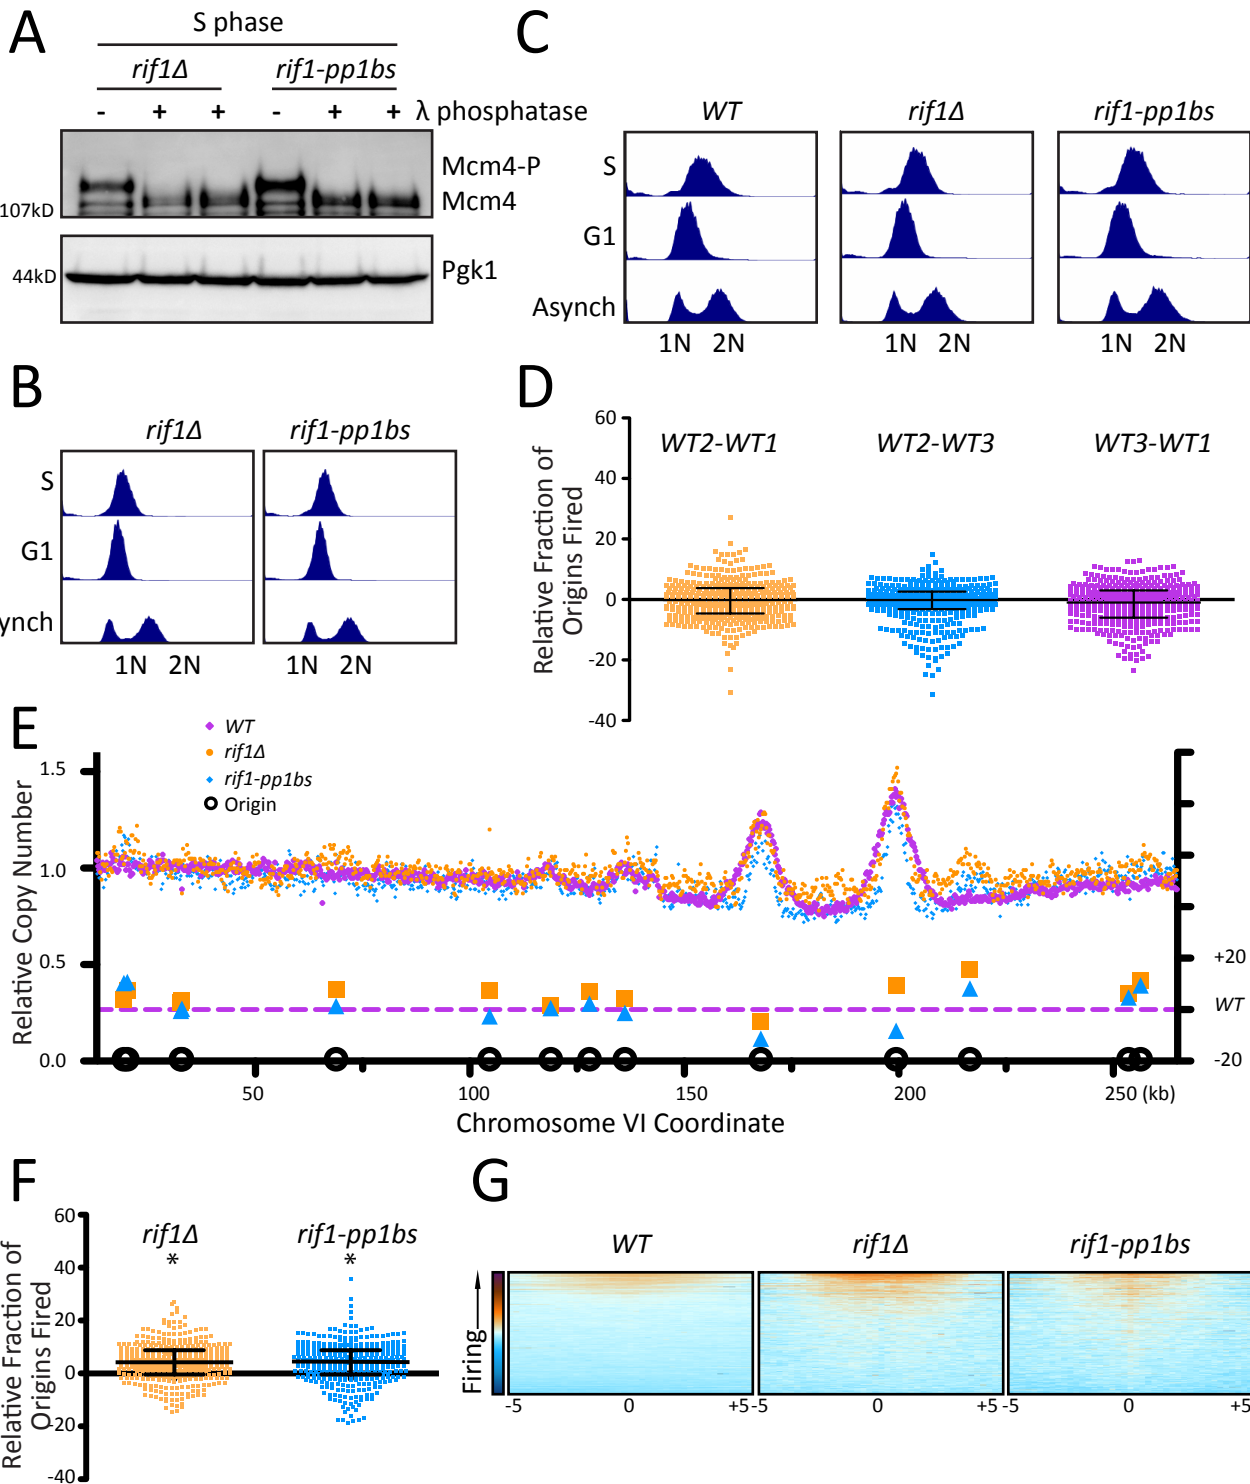

Supplement: supp [file elife_poa_e58066_Figure_1_figure_supplement_1.pdf › elife_poa_e58066_Figure_1_figure_supplement_1.pdf]

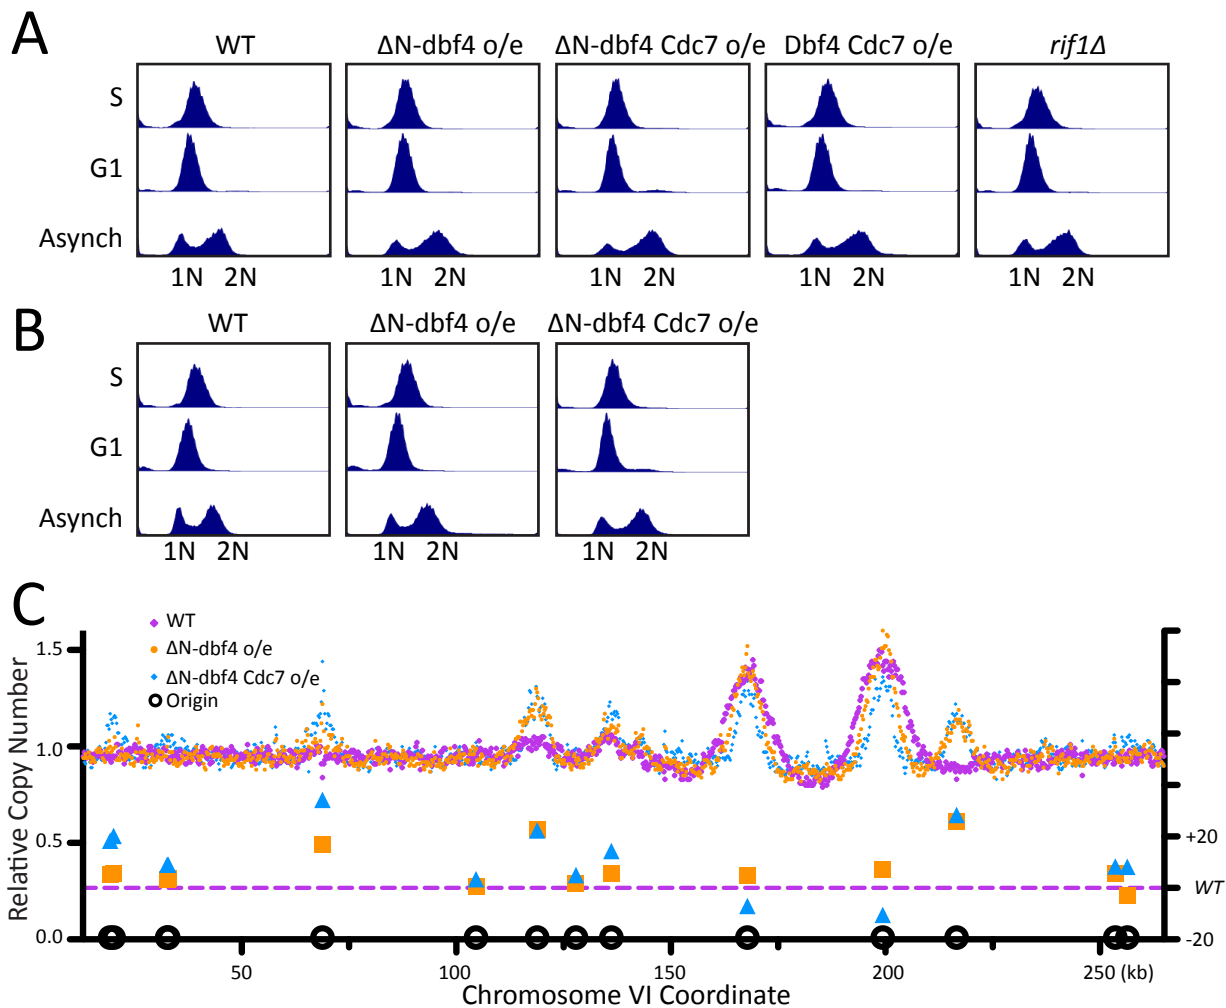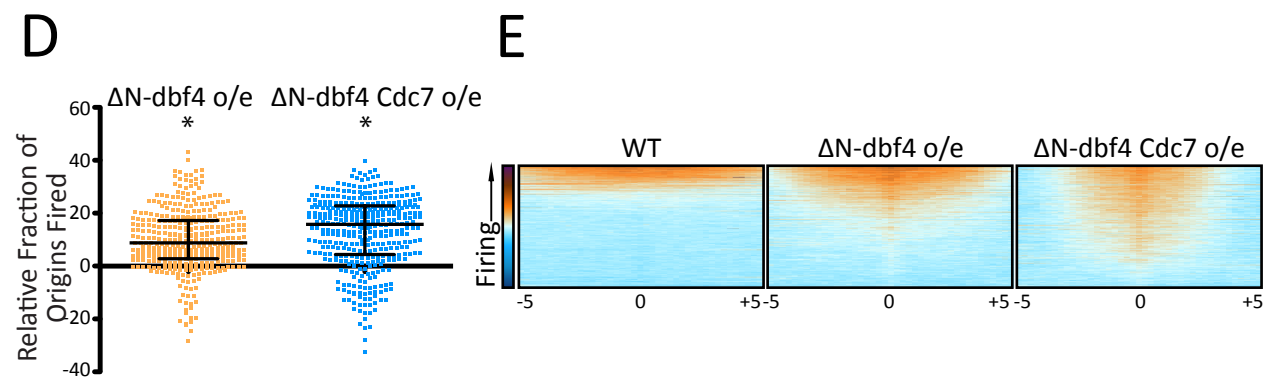

Supplement: supp [file elife_poa_e58066_Figure_2_figure_supplement_1.pdf › elife_poa_e58066_Figure_2_figure_supplement_1.pdf]

**A**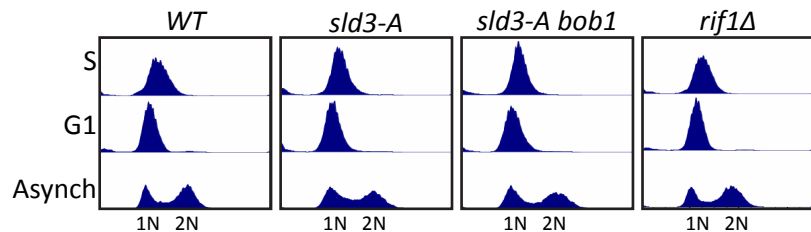**B**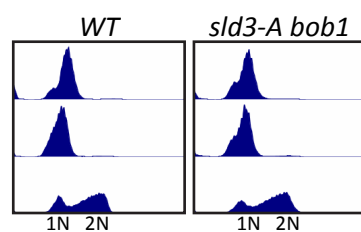**C**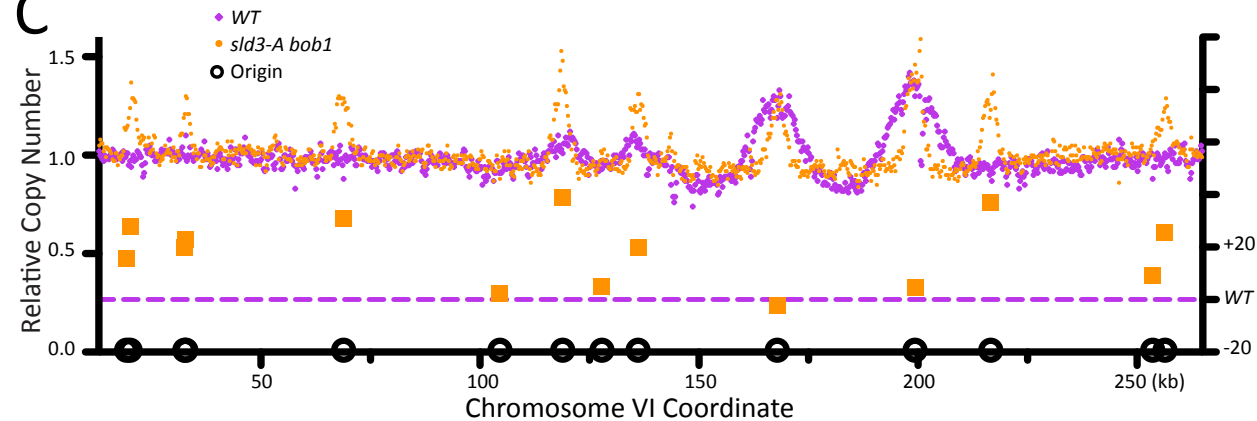**D**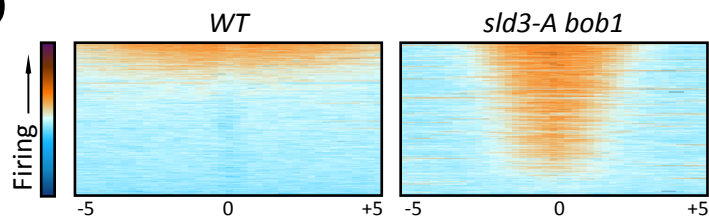

Supplement: supp [file elife_poa_e58066_Figure_3_figure_supplement_1.pdf › elife_poa_e58066_Figure_3_figure_supplement_1.pdf]

**A**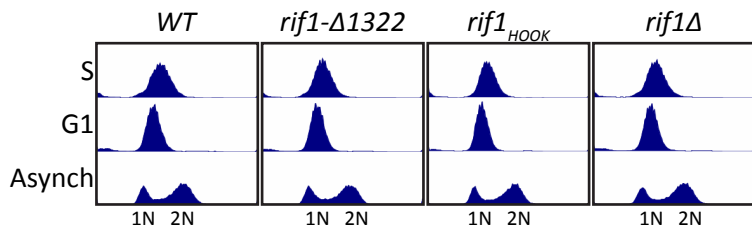**B**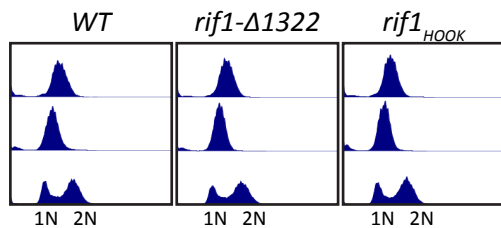**C**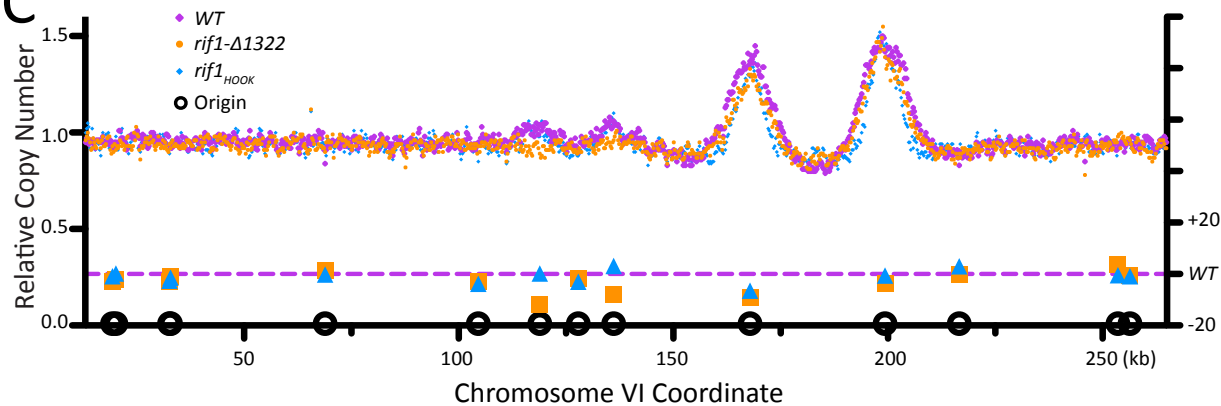**D**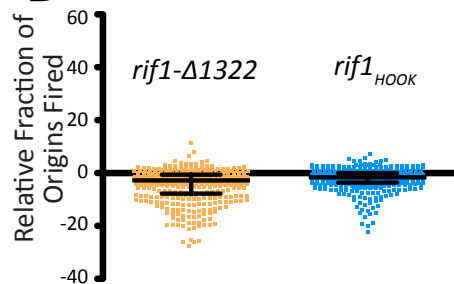**E**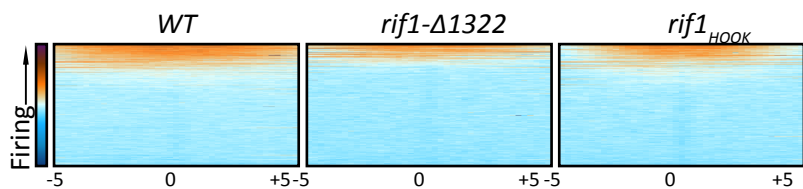

Supplement: supp [file elife_poa_e58066_Figure_4_figure_supplement_1.pdf › elife_poa_e58066_Figure_4_figure_supplement_1.pdf]
